# Supplementary material for: Automated recognition of retroviral sequences in genomic data—RetroTector©
Source: PubMed Central journal article supplement — Nucleic Acids Res. 2007 Jul 17;35(15):4964–76. doi: 10.1093/nar/gkm515 (PMC1976444; doi:10.1093/nar/gkm515), 2007-07-17

# Supplementary Data Contents

(please use links below or bookmarks to navigate)

---

- S1 - [Mutational Models](#)
- S2 - [Retrovirus Structures](#)
- S3 - [Motifs](#)
- S4 - [RetroTector output HERV-Fc1](#)
  - 1. [LTRID](#)
  - 2. [RetroVID](#)
  - 3. [ORFID](#)
    - 3.1. [ORFID-Gag](#)
      - 3.1.1. [Gag Putein](#)
    - 3.2. [ORFID-Pro](#)
      - 3.2.1. [Pro Putein](#)
    - 3.3. [ORFID-Pol](#)
      - 3.3.1. [Pol Putein](#)
    - 3.4. [ORFID-Env](#)
      - 3.4.1. [Env Putein](#)
  - 4. [XonID](#)
  - 5. [Chainview](#)
- S5 - [Genes in Reference Retroviruses](#)
- S6 - [RetroTector vs. RepeatMasker](#)
- S7 - [RetroTector vs. HERVd](#)
- S8 - [Detailed comparison of ReTe with RepeatMasker](#)
- S9 - [ReTe vs RM, galGal3 canFam2 and hg18](#)
- S10 - [ReTe vs RM galGal3](#)
- S11 - [ReTe vs RM canFam2](#)
- S12 - [ReTe vs RM hg18](#)
- S13 - [ReTe vs RM galGal3 smaller set](#)
- S14 - [ReTe vs RM canFam2 smaller set](#)
- S15 - [ReTe vs RM hg18 smaller set](#)
- S16 - [Description of some proviral chains missed in older or recent versions of RM](#)
- S17 - [Two ERVs missed by RM.pdf](#)

# MUTATIONAL MODELS USED TO RECONSTRUCT DEGRADED RETROVIRAL SEQUENCES

In order to test the detection limit of RetroTector with regard to degraded retroviral sequences, such as old integrations, a test set was created. This test set consists of a retroviral sequence that has been mutated to varying degrees according to four different models.

## Data set

The test set sequences are all based on the complete genome of HIV-1, isolate MN (HIVMNCG, Genbank accession number M17449), with degradation ranging from 1 to 60 or 90 percent mutations, with one percent intervals. To avoid biases and increase variability, all test set sequences are based on the original, unmutated HIVMNCG, as opposed to letting the highly degraded sequences build upon the less degraded ones. For each level of degradation, and for each model, 20 sequences were generated.

RetroTector is designed for the analysis of genomes, so each test set sequence was surrounded by an insertional repeat and 16000 random bases, to be in a proper context.

## Random model

The first model uses equal probabilities for all positions to be substituted, and equal probabilities for all nucleotides (i.e. 0.25). This is also known as the Jukes-Cantor model. Mutation ranging from 1 to 60 % with 1 % intervals, and 20 sequences generated for each level, yields a set of 1200 sequences.

## Kimura model

This model uses substitution frequencies according to Kimura's two parameter model, where transitions are twice as probable as transversions. All positions in the sequence have the same probability of mutation. As above, 1200 sequences were generated.

## Indel model

Most endogenous retroviruses seem to lack function. Without function, there is no selection to keep the ERV intact. A reasonable hypothesis is that the mutational decay of non-functional retroviral integrations is similar to that of pseudogenes. In this model, substitutions follow the same pattern as in the Kimura model. Insertions and deletions are added according to the frequencies found by analyzing data sets of human and murid pseudogenes (Gu and Li, 1995; Ophir and Graur, 1997).

Ophir and Graur (1997) state that deletions occur on average once every 40 substitutions and insertions once every 100 substitutions. The mean size of deletions is 4.67 and the standard deviation is 0.90. Therefore, the upper limit for number of bases deleted is set to  $4.67 + 2 \times 0.90$ , or approximately 7, since this should cover 95% of all cases, assuming a normal distribution. Gu and Li give a formula for the size distribution (which is not normal, but mean + 2\*SD should still cover most cases) of deletions:

$$F(\text{probability of bases deleted}) = 0.52 * (\text{number of bases deleted})^{-1.86}$$

Insertions have a mean size of 8.03 and a standard deviation of 2.46, so the upper limit is set to 13 bases. The formula according to Gu and Li is  $F = 0.54 * (\text{No. of bases inserted})^{-1.95}$

When the model calls for a deletion, a random number between 0 and 1 is generated. According to the formula above, the number of bases to be deleted is determined by the following boundaries:

|                      |                            |
|----------------------|----------------------------|
| $x \leq 0.52$        | 1 base deleted             |
| $0.52 < x \leq 0.66$ | 2 bases deleted            |
| $0.66 < x \leq 0.73$ | 3 bases deleted            |
| $0.73 < x \leq 0.77$ | 4 bases deleted and so on. |

Mutation degree lies between 1 and 60 %, with 1 % distance between sets. Twenty sets gives a total of 1200 sequences.

### **Exogenous model**

An active retrovirus has exogenous as well as endogenous phases, and is subjected to selectional pressure during each of these. Mutations that adversely affect the ability of the retrovirus to infect and replicate, are eliminated from the population.

This model uses the 217 complete genomes from HIV-1 and SIV that are aligned on codon level in the HIV Sequence Database at Los Alamos Laboratories, US. The statistics for substitutions and gaps for each position in this alignment is calculated, and these statistics are then the basis for the model.

When the model calls for a substitution, the frequency of nucleotides in the corresponding position in the alignment determines the probability of which nucleotide to substitute for. Deletions and insertions are also dependent on the large alignment from Los Alamos: bases can only be deleted if there is a gap in some of the other sequences, and the probability is ruled by the frequency of gap in the alignment. Only whole codons are deleted, using these borders (they follow the rules from the indel model):

|                    |                      |
|--------------------|----------------------|
| $x \leq 0.7$       | One codon removed    |
| $0.7 < x \leq 0.9$ | Two codons removed   |
| $0.9 < x \leq 1$   | Three codons removed |

Insertions are dependent on the other sequences in the alignment, that decide the probabilities for different bases to be inserted. Only whole codons are inserted.

The model was run with mutation ranging from 1 to 90 percent mutation, with 20 sequences for each level, i.e. 1800 reconstructed sequences.

## RESULTS

### Random model

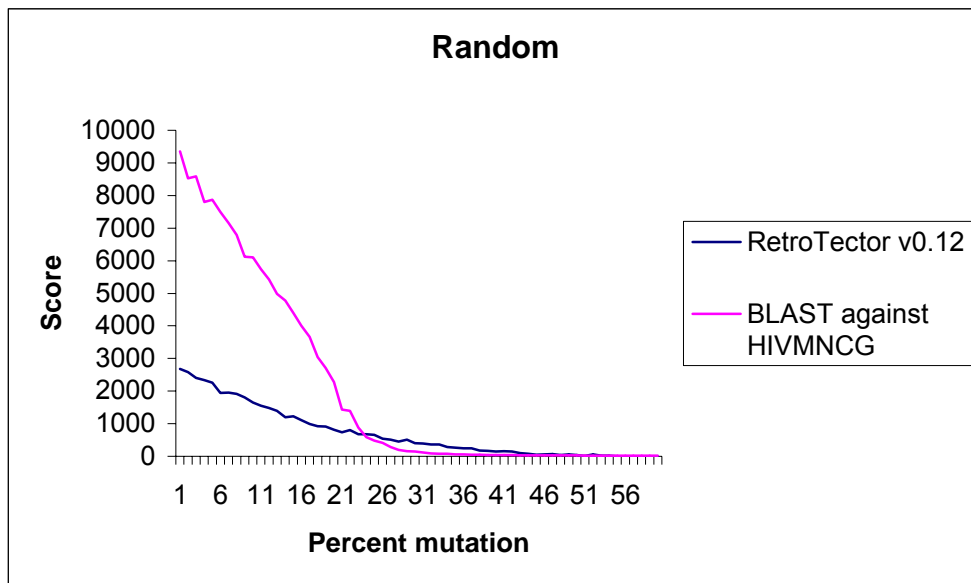

Figure S1.1: Average scores for 20 sets of random mutation.

When looking at the trend in this diagram, it is clear that BLAST has a steeper slant. This shows that BLAST is more negatively affected by the degradation of the sequence (figure S1.1).

After normalising by dividing each score with the score for the original, unmutated HIVMNCG, the graphs show that for low degrees of mutation, BLAST and RetroTector perform equally well, which was expected. However, when the mutations increase (around 15 % and up), RetroTector is much better at recognising the sequence as a retrovirus (figure S1.2). As discussed elsewhere in this work, a reasonable limit for recognition as a “retrovirus” is a RetroTector chain score of 300.

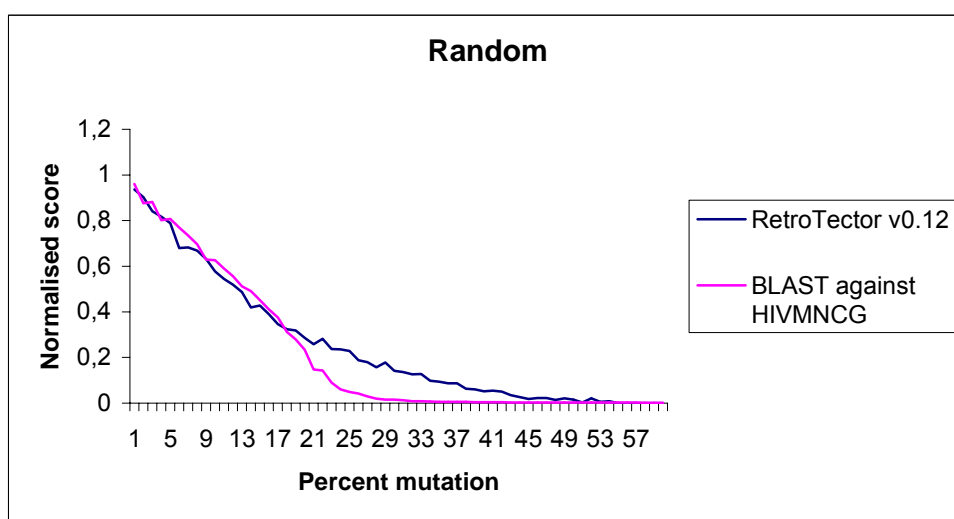

Figure S1.2: Average normalised scores for 20 sets of random mutation.

Now the objection can be raised that RetroTector scores the sequence according to rules for a general retrovirus, whereas BLAST compares to the original sequence HIVMNCG, and therefore cannot take advantage of conservative mutations like RetroTector. To address this, one sequence from each degree of mutation was matched against the entire non-redundant nucleotide database from GenBank (figures S1.3 and S1.4). Due to time restrictions, all 20 sets could not be analysed in this way. Since the mutation models are ruled by random variables, stochastic variations in the sequences produced must be taken into account.

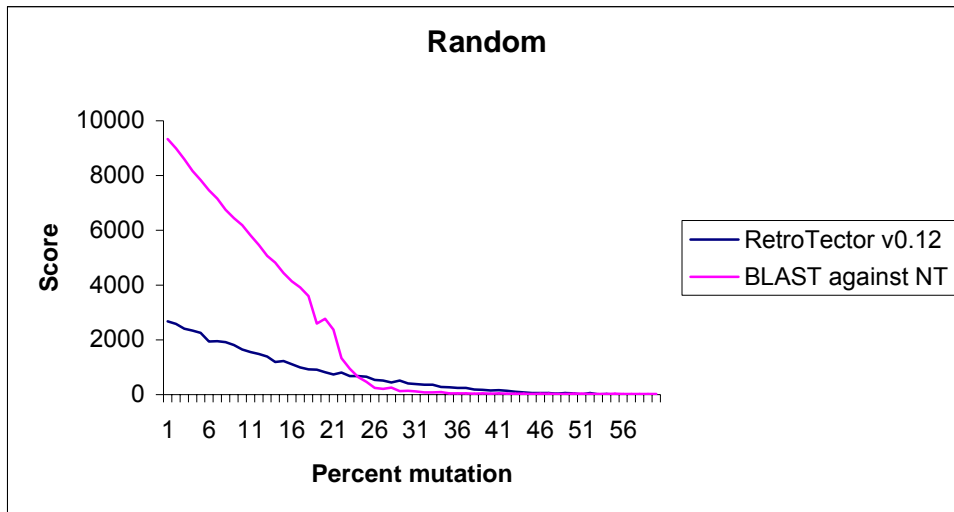

Figure S1.3: Score for one sequence matched with BLAST against the nt database, compared to the average score for 20 sequences analysed with RetroTector.

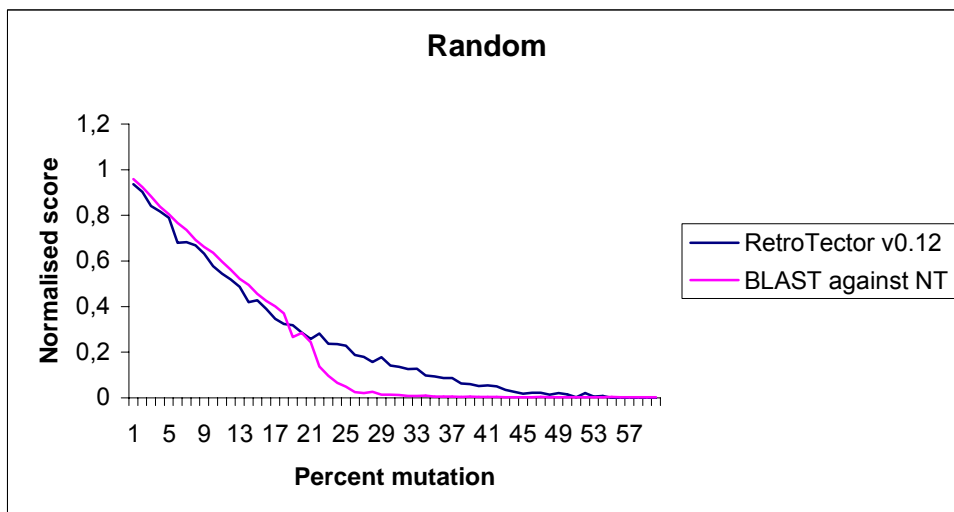

Figure S1.4: Normalised score for one sequence matched with BLAST against the nt database, compared to the average normalised score for 20 sequences analysed with RetroTector.

The trend is the same even when BLAST can choose between all sequences in the nonredundant nucleotide sequence (NT) database from Genbank. RetroTector still is better at

recognising retroviral properties when the degree of mutation increases above around 20 %. When the degree of mutation is low, BLAST obtains the highest score when matching against the original HIVMNCG. When mutation increases, other accessions take over, mainly sequences coding for one or a few specific HIV-1 proteins like env. When the sequence is highly degraded (above 40 % degradation), BLAST reports the highest scores against completely unrelated entries in the database, like mouse BAC clones and human clones. In this model, the highest scores came from matching against HIVMNCG.

### Kimura model

When the mutation model takes a step closer to reality, the trend seen with the randomly mutated sequences is even clearer. BLAST scores drop fast and vanish at around 30%, while RetroTector detects the sequence as retroviral up till 45% mutation. (figures S1.5 to S1.8).

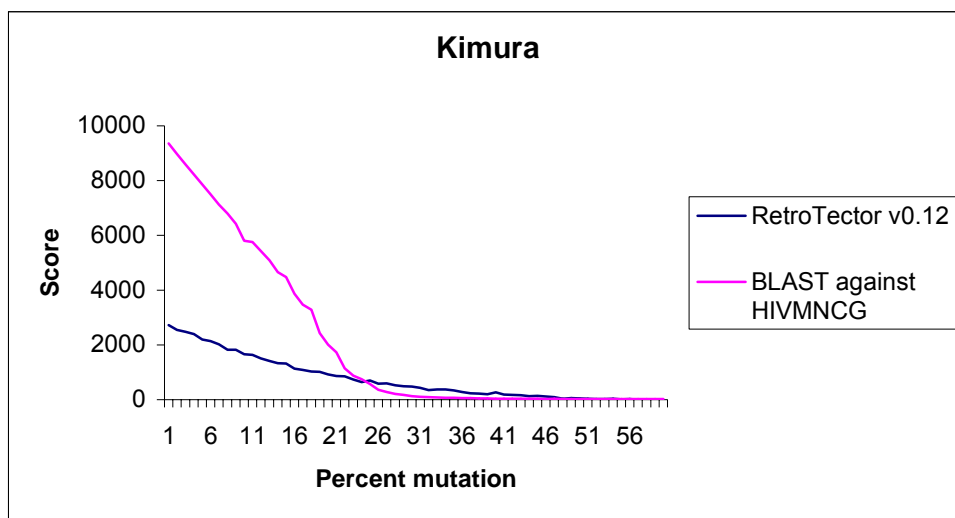

Figure S1.5: Average scores for 20 sets of mutation according to the Kimura model.

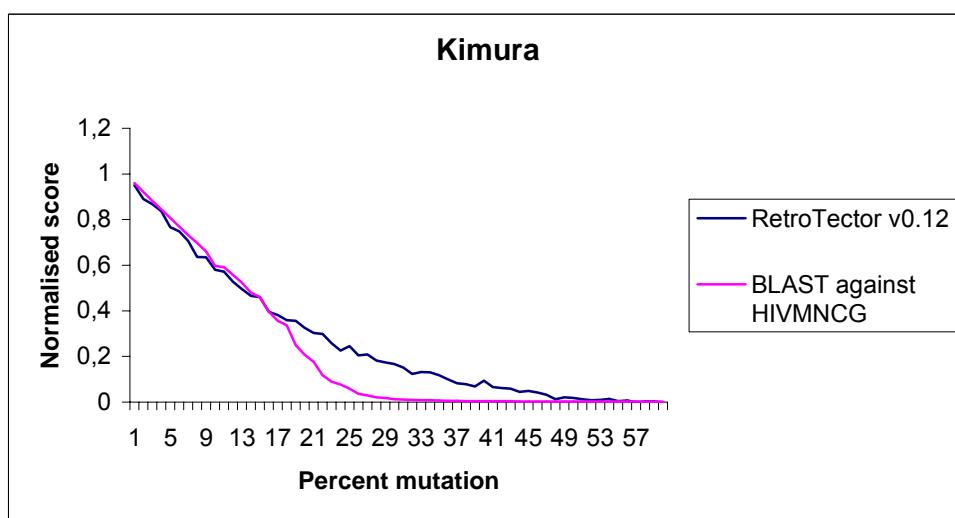

Figure S1.6: Average normalised scores for 20 sets of mutation according to the Kimura model.

When analysing one sequence from each percent mutation with BLAST and the nt database, 37 highest-scoring hits is against HIVMNCG. A few hits are to other whole-genome HIV-1 sequences, and quite many against parts of HIV-1 genomes like env or gag, as in the random model. As the sequence is almost totally degraded, a few hits to completely unrelated sequences appear.

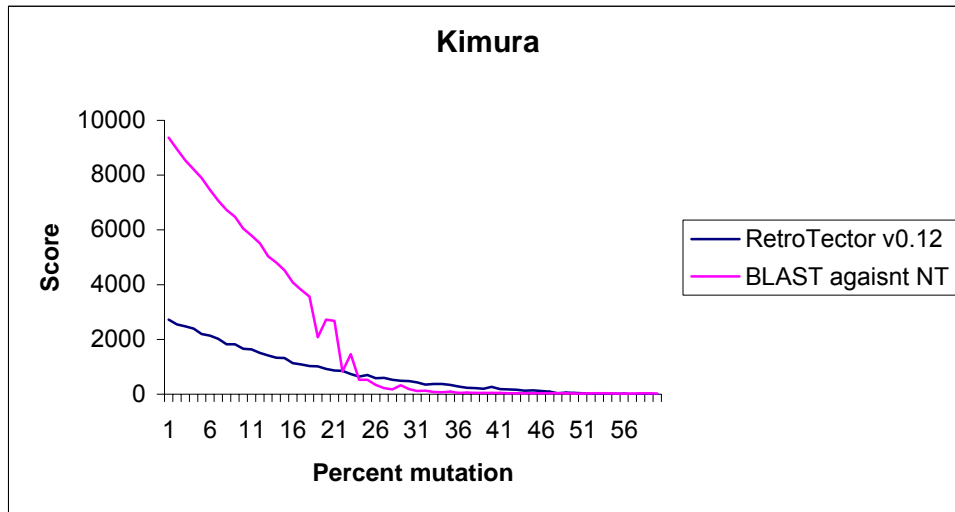

Figure S1.7: Score for one sequence matched with BLAST against the nt database, compared to the average score for 20 sequences analysed with RetroTector.

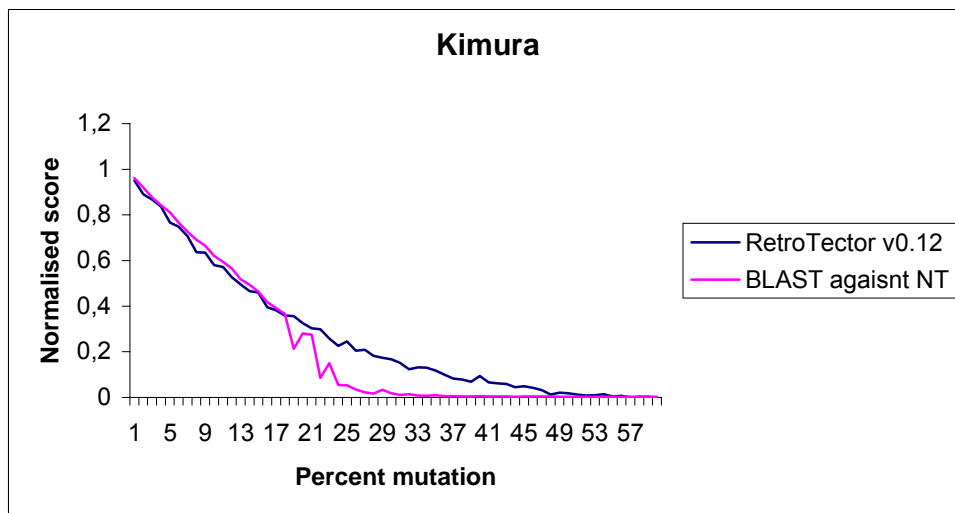

Figure S1.8: Normalised score for one sequence at each level of mutation analysed with BLAST and the nt database, compared to the average normalised score for 20 sequences analysed with RetroTector.

### Indel model

In this model, not only substitutions alter the sequences, but deletions and insertions allow the sequences to degrade even faster. This is reflected in the scores that drop much faster than in

the previous two models. Here, RetroTector shows a clear dominance even for sequences with a low degree of mutation (figures S1.9 to S1.12).

The indel model is the model that comes closest to mimicking the real situation for endogenous retroviruses. A mutation level of 20 % would reflect an element that integrated 100 million years ago, assuming a mutation rate of 0.2 % divergence per million years (Li, 1997). BLAST does not recognize an element this degraded, but RetroTector is still able to detect it (fig S1.9).

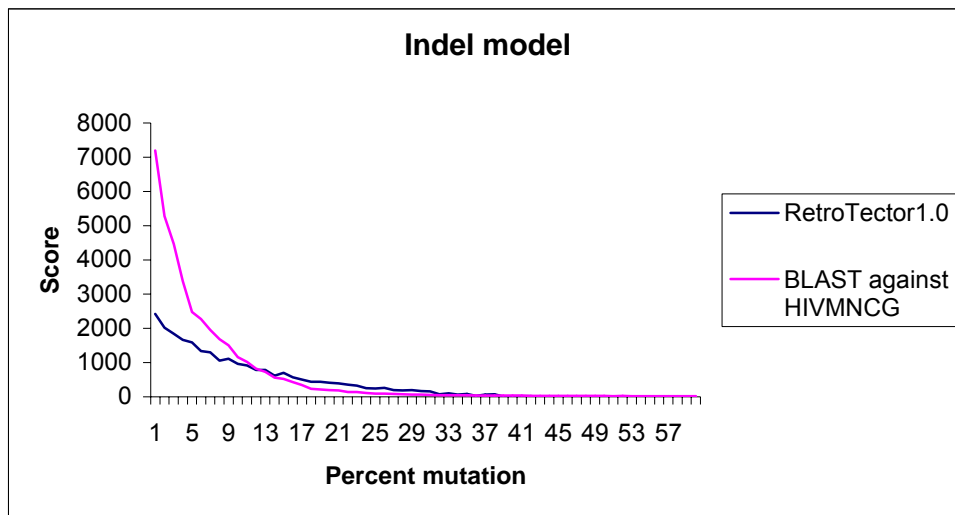

Figure S1.9. Average score for 20 sets of sequences mutated according to the indel model.

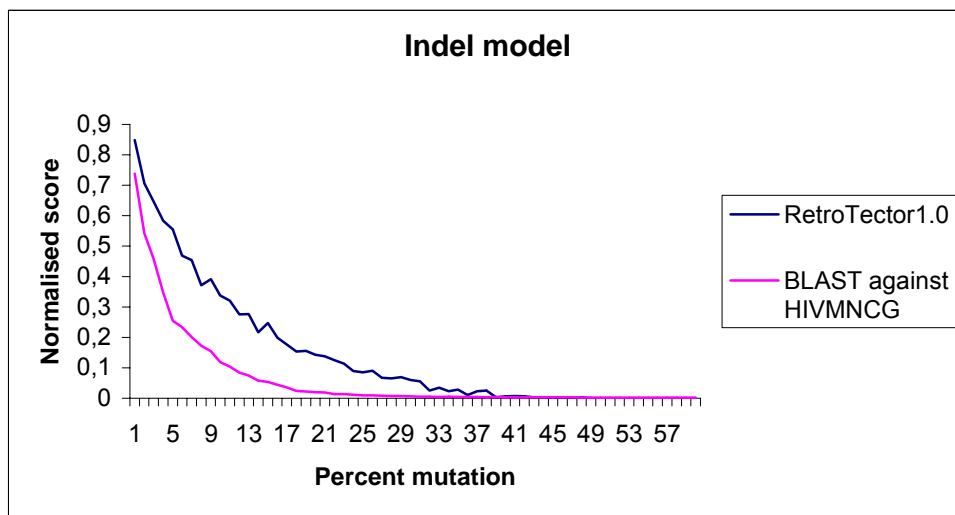

Figure S1.10: Average normalised score for the indel model sequences.



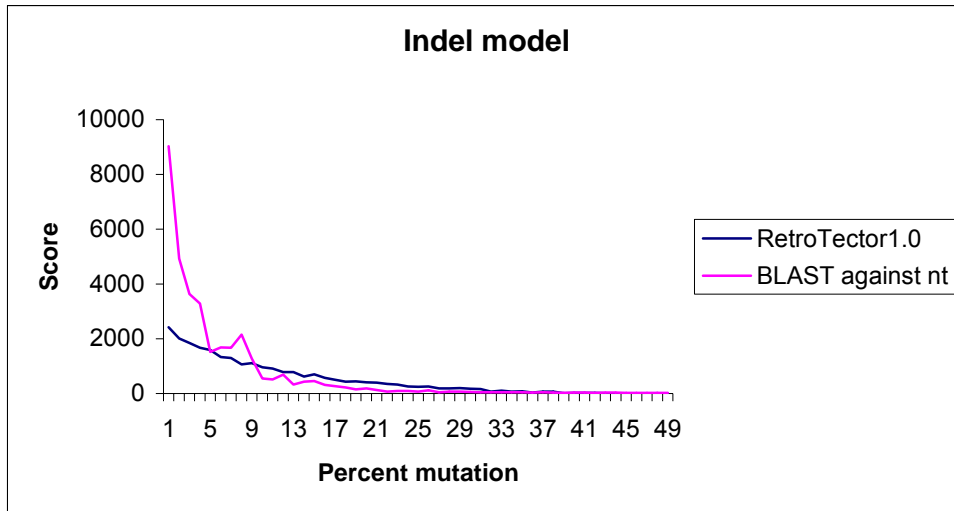

Figure S1.11: Score for one sequence analysed with BLAST and nt compared to the average score for 20 sequences analysed with RetroTector.

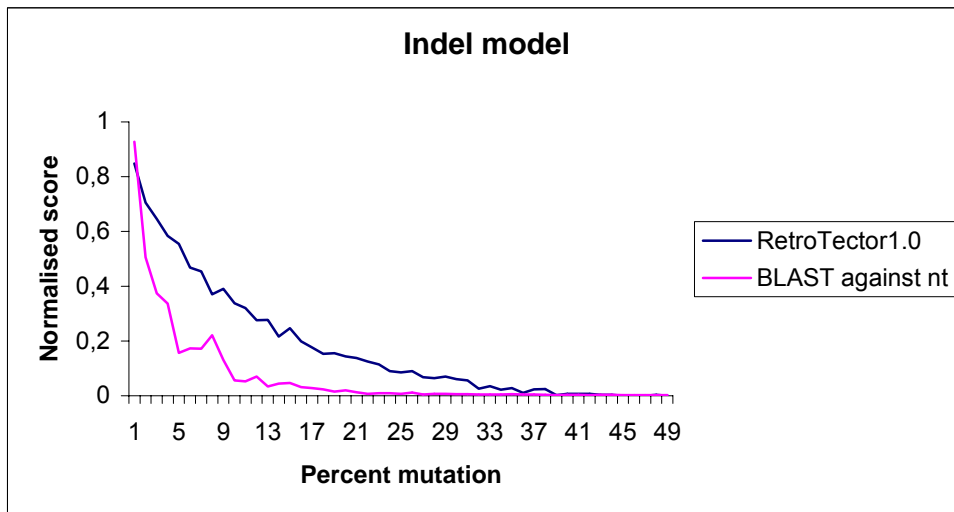

Figure S1.12: Normalised score for one sequence analysed with BLAST and nt, together with the average normalised score for 20 sequences assessed with RetroTector.

### *Puteins*

RetroTector attempts to reconstruct the retroviral proteins. Study of the Pol puteins shows that as the mutation of the sequence increases, it becomes more difficult for RetroTector to achieve a perfect replica of the original protein, since this information is lost during the mutation process. Yet, at a mutation level as high as 20 %, over half of the residues in the putein are identical to the original protein.

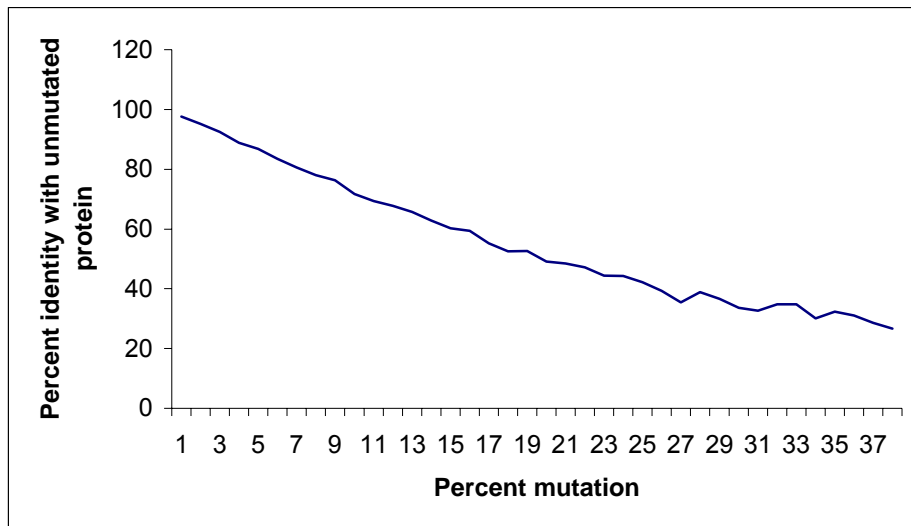

Figure S1.13: Sequence identity for Pol proteins in the indel model.

### Exogenous model

This model uses real data to mimic mutation of an exogenous retrovirus under selectional pressure. Our expectation was that BLAST would find it easier to keep up with RetroTector when most mutations are discarded due to the statistic from Los Alamos. However, this is the model that truly demonstrated the power of RetroTector when compared to BLAST – RetroTector scores stays on a constant high level, with a normalised score close to 1, whereas BLAST scores drops as in the previous studies (figures S1.14 to S1.17).

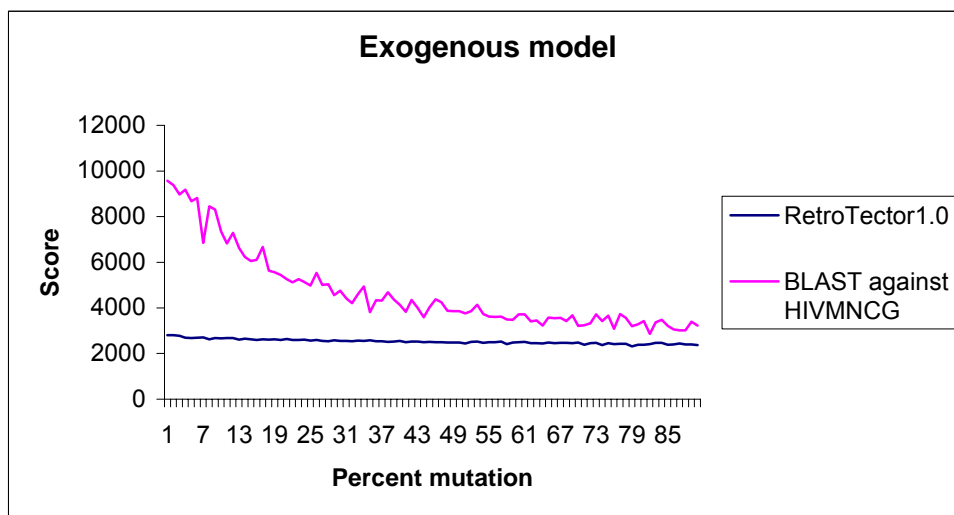

Figure S1.14: Average scores for sequences mutated according to real data, reflecting the properties of exogenous HIV-1. Note that the RetroTector score remains virtually constant.

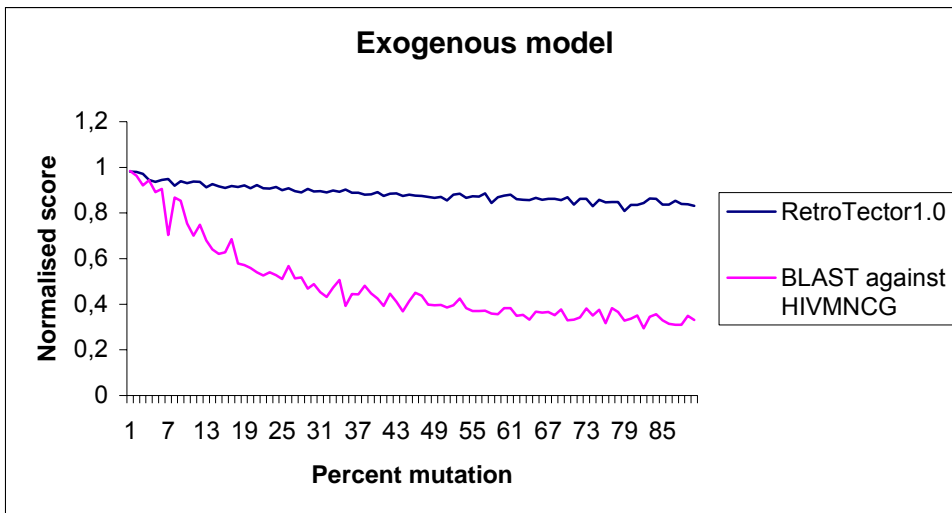

Figure S1.15: Normalised score for the exogenous model sequences.

When BLAST is free to utilise the entire nt database, the scores still drop, although not as much as in the previous models. HIVMNCG is the highest scoring match in 35 out of 90 cases, and other HIV-1 sequences yield the rest.

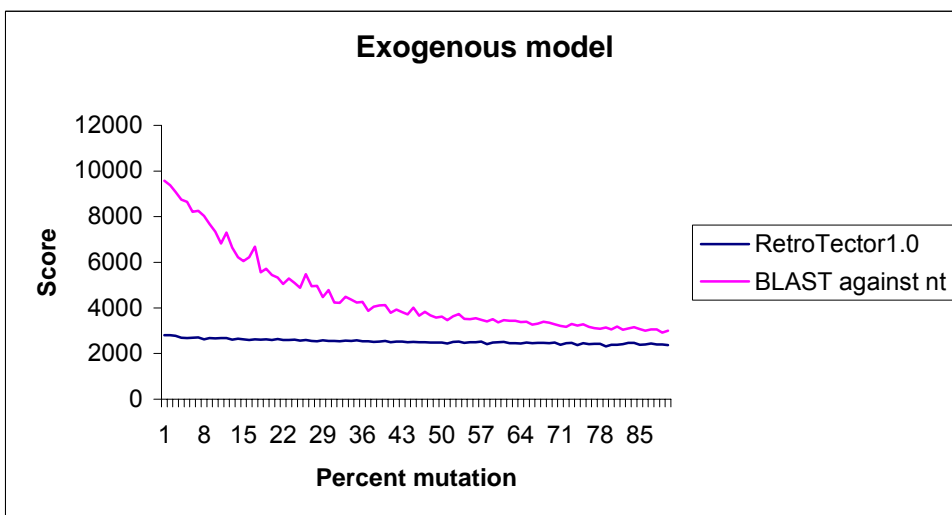

Figure S1.16: Average score for sequences matched against nt with BLAST, compared to the average result from 20 sequences scored with RetroTector.

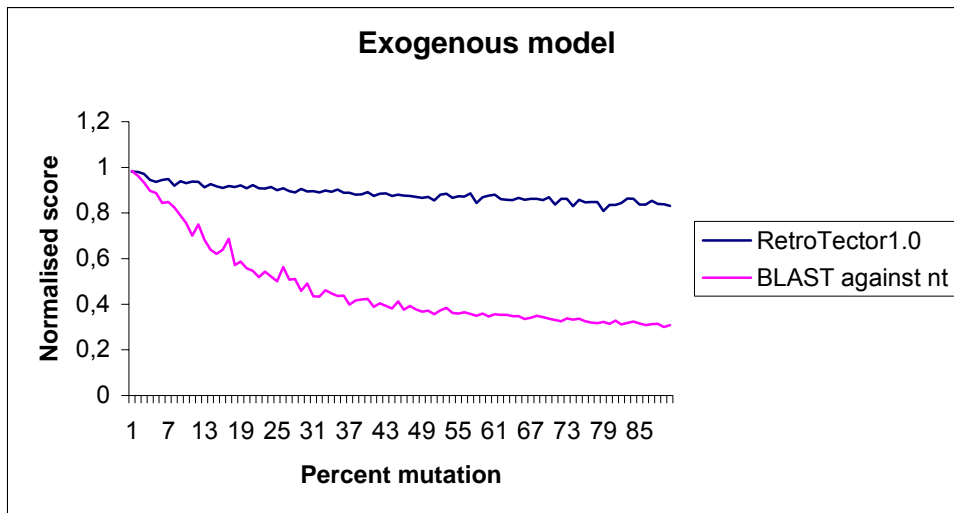

Figure S1.17: Normalised values for the scores in the exogenous model.

***Proteins***

RetroTector is able to reconstruct the Pol protein almost perfectly throughout the exogenous model simulations. This is encouraging. It is also expected, since the mutation model does not allow mutations that would be detrimental to the virus function, and the Pol protein has many conserved portions.

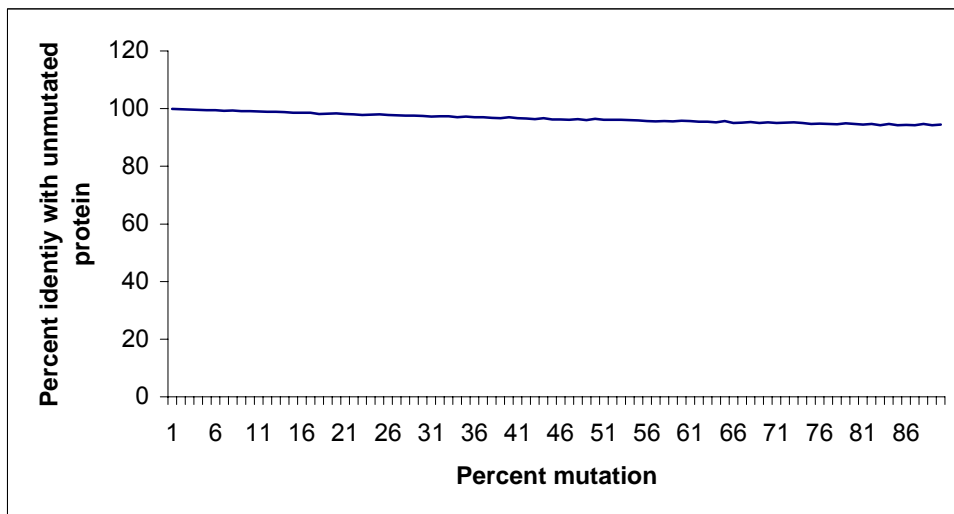

Figure S1.18: Sequence similarity for Pol proteins in the exogenous model.

## Sample alignment

CLUSTALW alignment with three sequences:

The original HIVMNCG Pol protein

A putein reconstructed from a sequence with 10 % mutation according to the indel model

A putein reconstructed from a sequence with 75 % mutation according to the exogenous model

HIVMNCG PISPIETVPVKLKPMDGPKVKQWPLTTEKIKALIEICTEMEKEGKISKIGPENPYNTPV  
 Exogenous75% PISPIDTVPVKLPMDGPKVKQWPLTTEKIKALTEICTEMEKEGKISKIGPENPYNTPV  
 Indel10% PISPIQTVPTKLPMDRPKVKQN--IDKIKTLIEICTGMEKEGKISKIGPEN-IQYSI  
 \*\*\*\*\*:\*\*\*.\*\*\*\*\* \*\*\*\*\* :\*\*\*:\*\*\* \*\*\*\*\* :.:

HIVMNCG FAIKKKDS---TKWRKLVD-FRELNKKTQDFWEVQLGIPHAGLKKKSVTVLVDVGDAY  
 Exogenous75% FAIKKKDS---TKWRKLVD-FRELNKKTQDFWEVQLGIPHPAGLKKKSVTVLVDVGDAY  
 Indel10% FAIKKKDSQRZVTEWRKLVVIFRELNKKTQDFWEVQZGIPHPA---KKKSVTMLYVGYAY  
 \*\*\*\*\* \*:\*\*\*\*\* \*\*\*\*\*: \*\*\*\*\*: \*\*\*\*\*:\*\*\* \*\* \*

HIVMNCG FSVPLDKDFRKYTAFTIPSINNETPGIRYQYNVLPQGKGSFAIFQSSMTKILEPFRKQN  
 Exogenous75% FSVPLDKDNFRKYTAFTIPSINNETPGIRYQYNVLPQGKGSFAIFQSSMTKILEPFRKKN  
 Indel10% FSVPL---RKRTAFTMPSINNETPEIRYQZNVLSQGCKGSFAIFQSSD-KILEPFTKQN  
 \*\*\*\*\* \*\* \*\*\*\*\*:\*\*\*\*\* \*\*\*\*\* \*\*.\* \*\*\*\*\* \*\*\*\*\* \*\*:

HIVMNCG PDIVIYQYMDDLY--VGSdleIGQHRAKIEELRRHLLRWGFTTPDKKHQKE---PPFLW  
 Exogenous75% PDIVIYQYMDDLY--VGSdleIGQHGTKIEELREHLLRWGFTTPDKKHQKE---PPFLW  
 Indel10% PDIVIYQYRMVCMZDLSTdleIGQHZAKIEELRRHLLRWGFTTPDKKHQDAHICNPPFLW  
 \*\*\*\*\* :.\*\*\*\*\* :\*\*\*\*\*.\* \*\*\*\*\* . \*\*\*\*\* \*\*\*\*\*

HIVMNCG MGyelHPDKWTVPiVL---PEKDSWTVNDIQKLVGKLNWASQIYAGIKVKQLCKLLRG  
 Exogenous75% MGyelHPDKWTVPiML---PEKDSWTVNDIQKLVGKLNWASQIYP- IKVKQLCKLLRG  
 Indel10% MGyVlHPDKRTVQSIVLNMakPEKESWTVNDIQKLVrKLNWAYQFYAGIKVKQLCKLLRE  
 \*\*\* \*\*\*\*\* \*\*.\*:\*\*\* \*\*\*\*\* \*\*\*\*\* \*\*.\* \*\*\*\*\* \*\*\*\*\*

HIVMNCG TKALTEV- IPlTeeAELELAENREILKEpVHGvYYDPSKDLIAEVQKQGQWtYQIyQE  
 Exogenous75% AKTLTEV- IPlTKEA--ELaENREILKEpVHGvYYDPSKDLIAEVQKQGQWtYQIyQE  
 Indel10% TKALTEVrVpPteeEELELAENREIQ--YVHGvYYDPSKDLIAEVHEQGLGQWtLN-FQE  
 :\*:\* \*\*\*\*\* :\* \*.\* \*\*\*\*\* \*\*\*\*\*:\*\*\*\*\*:\*\*\* \*\*\*\*\* :\*\*

HIVMNCG PFKNLKTGKYARMRGAHTNDVKQLTEAVQKIATESIviwGkTPkFRlPIQETWETWwTE  
 Exogenous75% PFKNLKTGKYAKRRGAHTNDVKQLAEAVQKIAKESIviwGkTPkFRlPIQETWETWwTD  
 Indel10% RFIN-RNWQmCKNGGcPHzRCKISNRGMQZiATESIviwGkTPkLdYpTKRNIgNmVDRD  
 \* \* .: .: \* . \* . .: \* \* .\*\*\*\*\*: \* .: .: .: .:

HIVMNCG YTXATWIPEWEVNTpPVLKLWYQLEKEPIVGAETfYVDGAANREtKKGkAGYVtNRGRQ  
 Exogenous75% YSQATWIPEWEVNTpPVLKLWYQLEKDPiVGAETfYVDGAANREtKZGkAGYVtDRGRK  
 Indel10% TZ-ATYIsewEvNtPslVklWdQleKEPIVGAQtFYVDAaANTETeRgkAGYVtNRGRQ  
 \*\*.\* \*\*\*\*\* .\*\*\*\*\* \*\*\*\*\*:\*\*\*\*\*:\*\*\*\*\* .\*\*\*\*\* \*\*.\* \*\*\*\*\*:\*\*\*\*\*:

HIVMNCG KVVSLTDTTNQKTELQAIHLALQDSGLEVNIvTDSQYALGIiQAQpDKseSelvSqiIEQ  
 Exogenous75% KVVSLPETTNQKTELQAIHLALQDSGLEVNIvTDSQYALGIiQAQpDKseSelvSqiIEQ  
 Indel10% KIVSLTDTTNQKTELQAIHQPLKDSVLEVNIvADSZZALGIiZAQpDKGESELVSQLIEQ  
 \*:\*:\* .:\*\*\*\*\* .:\*\*\* \*\*\*\*\*:\*\*\* \*\*\*\*\* \*\*\*\*\* .\*\*\*\*\*:\*\*\*

HIVMNCG LIkKEkVYLAWVPAHKIGGNEQVDKLVsAGIRKVLFLDGIkAQEDHEkYHSNWRAMAS  
 Exogenous75% LIkKEkVYLSWVPAHKIGRNEQVDKLVSTGIRKVLFLDGIkAQEEHEkYHSNWRAMAS  
 Indel10% LIkTEkVYVAVPAHKEIGGNEQVDKLAECWkQESTIFRLIAKsQEDHEkYRSND-SMTS  
 \*\*\*.\*\*\*\*\*:\*\*\*\*\* \*\* \*\*\*\*\* . . : : \* \*:\*:\*:\*\*\*\*\*:\*\*\* \*\*:

HIVMNCG DFNLPPIVAKEIVASCDKcQLKGEAMHGQVDCSPGIWQLDCTHLEgkVILVAVHVASGYI  
 Exogenous75% DFNLPPIVAKEIVASCDKcQLKGEAMHGQVDCSPGIWQLDCTHLEgkVILVAVHVASGYM  
 Indel10% DFNLPPIVAKEIVASCDKcQLKGEgiHGqVhCSAGiZQLNCTHLEgZVIVAVHVASVYI  
 \*\*\*\*\*:\*\*\*\*\*:\*\*\*\*\*.\*\*\*\*\*.\* \*\*\*\*\* \*\*.\* \*\*\*\*\* \*\* \*\*\*\*\* \*

```

HIVMNCG          EAEVIPAETGQETAYFLLKLAGRWPVKTIHTDNGPNFTSTTVKAACWWTGIKQEFGIPYN
Exogenous75%    EAEVIPAETGQETAYFLLKLAARWPVKIIHTDNGTNFTSSTVKAACWWTGIQQEFGIPYN
Indel10%        EVEISPAEAGQETAYFLLKLAGRWSVKTIHTDN-ANLTSTTLRPPFWWTGIKZEFGIPYN
                *.: **:*:*****. **.* ***** .*:**:*:.. *****: *****

HIVMNCG          PQSQGVIESMNKELKKIIGQVRDQAEHLKRAVQMAVFIHNFKRKGGIGGYSAGERIVGII
Exogenous75%    PQSQGVIESMNKELKKIIGQVRDQAEHLKRAVQMAVFIHNFKRKGGIGGYSAGERIIDII
Indel10%        PQSQGVIESMNKELKKIIVQVKDQAEH--RTVQLAVFINNYKKKGGIRGYSVGERIVGTI
                *****:***** **:*:***** *:*:*****:*:***** **.*:*****:.*

HIVMNCG          ATDIQTKELQKQITKIQNFRVYRDSRDPLWKGPAKLLWKGEGAVVIQDNNDIKVPPRRK
Exogenous75%    ATDIQTKELQKQITKIQNFRVYRDSRDPLWKGPAKLLWKGEGAVVIQDNNDIKVPPRRK
Indel10%        ATDIQAKELQKQIT--QNFRDYRNSRDPVWKVPAKLLW-GEGAAVTQDNDDRKVVPPRRK
                *****:***** **** *:*:*****:* ***** *****.* *****:* *****

HIVMNCG          AKVIRDYGKQTAGDDCVASRQDED
Exogenous75%    AKIIRDYGKQTAGDDCVAGRQDED
Indel10%        AKAIRDYGKQTAGDDCVASRQDZD
                ** *****.* *****.* ** *

```

## REFERENCES

- Gu, X. and Li, W.H. (1995) The size distribution of insertions and deletions in human and rodent pseudogenes suggests the logarithmic gap penalty for sequence alignment. *J Mol Evol*, 40, 464-473.
- Li, W.H. (1997) *Molecular Evolution*. Sinauer Associates, Inc., Publishers, Sunderland, MA, USA.
- Ophir, R. and Graur, D. (1997) Patterns and rates of indel evolution in processed pseudogenes from humans and murids. *Gene*, 205, 191-202.

# Selected RetroTector<sup>®</sup> outputs

Selected endogenous retroviruses (ERVs) and exogenous retroviruses (XRVs) extracted from the human genome (hg16), and from annotations in GenBank.

(Graphic display of LTRs depend on the availability of full LTRs [U5-R-U3].)

(Graphic display quality of ERVs depend on their ages [accumulated mutations])

---

## Legend

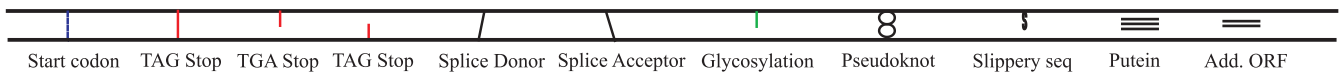

Start codon TAG Stop TGA Stop TAG Stop Splice Donor Splice Acceptor Glycosylation Pseudoknot Slippery seq Putein Add. ORF

Reading frames are indicated as **1, 2 and 3**

---

## Motifs

**5LT** 5'LTR

**PBS** Primer binding site

**Gag** Group specific antigen

MA1, MA2..... Matrix  
CA0, CA1, CA2..... Capsid  
NC1, NC2..... Nucleocapsid (zinc fingers)

**Pro** Protease

DU0, DU1, DU2..... dUTPase (deoxyuridine triphosphatase)  
PR1, PR2, PR3..... Protease

**Pol** Polymerase

RT1, RT2, RT3, RT4, RT5, RT6..... Reverse transcriptase  
RT7..... RNaseH (Ribonuclease H)  
DL1, DL2..... dUTPase (deoxyuridine triphosphatase)  
In1, IN2, IN3, IN4, IN5, IN6, IN7..... Integrase

**Env** Envelope

SU2, SU3..... Surface unit  
TM2, TM3, TM4, TM5..... Transmembrane protein

**PPT** Polypurine tract

**3LT** 3'LTR

---

## Retrovirus Abbreviations

|       |                               |
|-------|-------------------------------|
| FLV   | Feline Leukemia Virus         |
| HERV  | Human Endogenous Retrovirus   |
| HFV   | Human Foamy Virus             |
| HIV   | Human Immunodeficiency Virus  |
| HTLV  | Human T-Cell Leukemia Virus   |
| MMTV  | Mouse Mammary Tumor Virus     |
| MoMLV | Moloney Murine Leukemia Virus |
| MPMV  | Mason-Pfizer Monkey Virus     |
| RSV   | Rous Sarcoma Virus            |
| WDSV  | Walleye Dermal Sarcoma Virus  |

# Errantivirus

Cer1/Gypsy-U15406

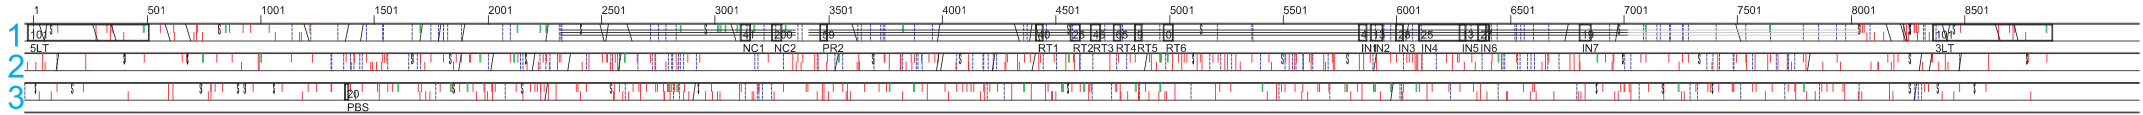

# Alpha

RSV-J02342

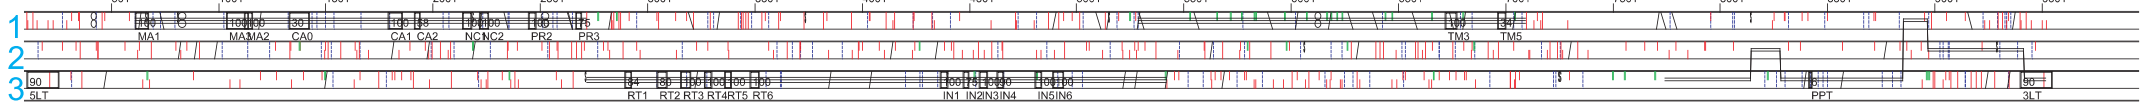

# Beta

MMTV-NC\_001503

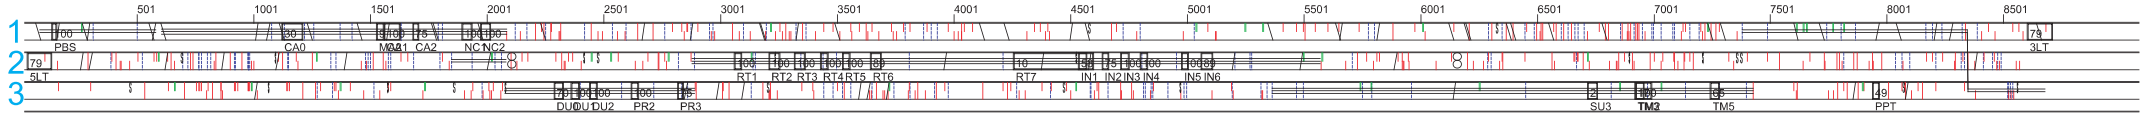

MPMV-NC\_001550

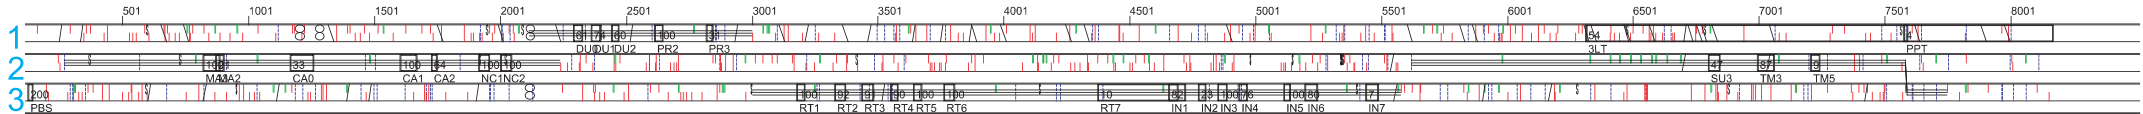

# Gamma-like HERV

HERV-Fc1-AL354686

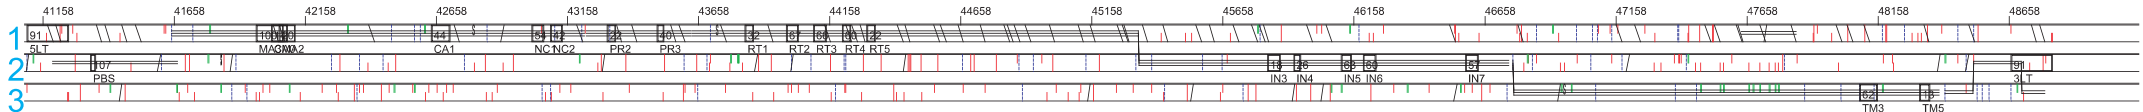



# Gamma

MoMLV-J02255

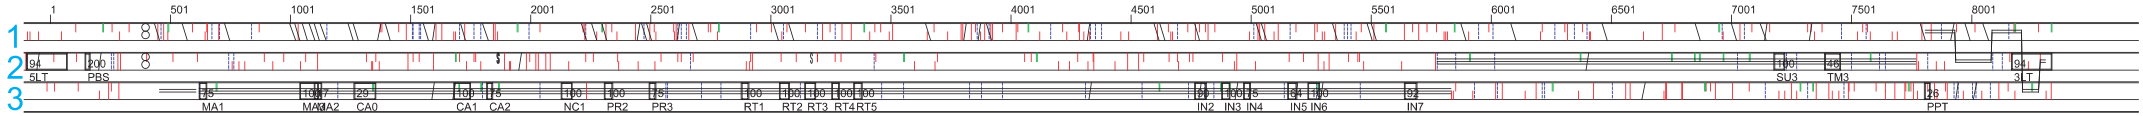

FLV-NC\_001940

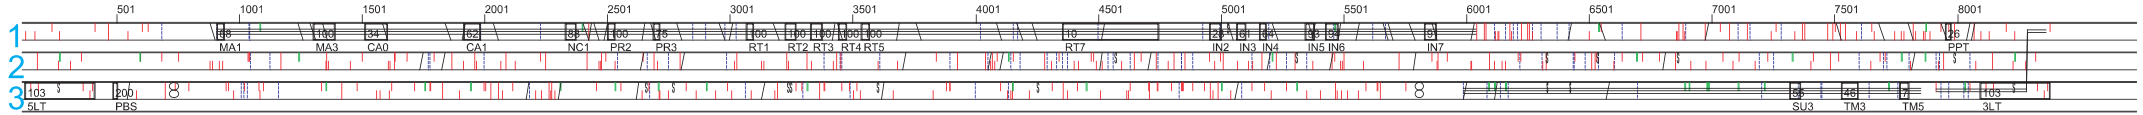

# Delta

HTLV2-M10060

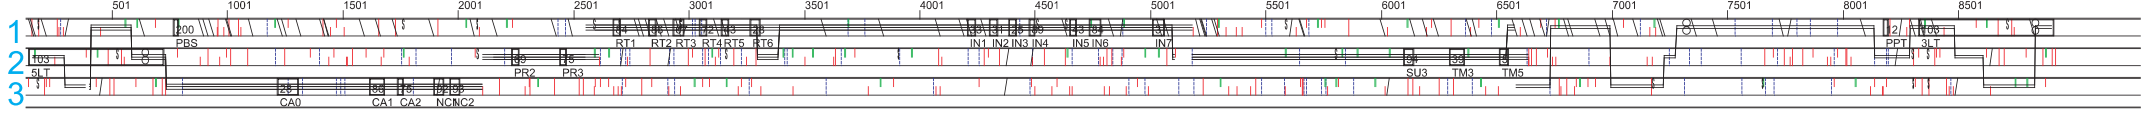

# Epsilon

WDSV-NC\_001867

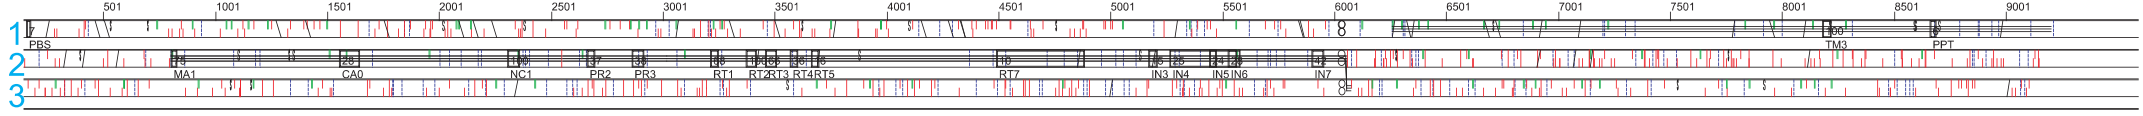

# Lenti

HIV1-K03455

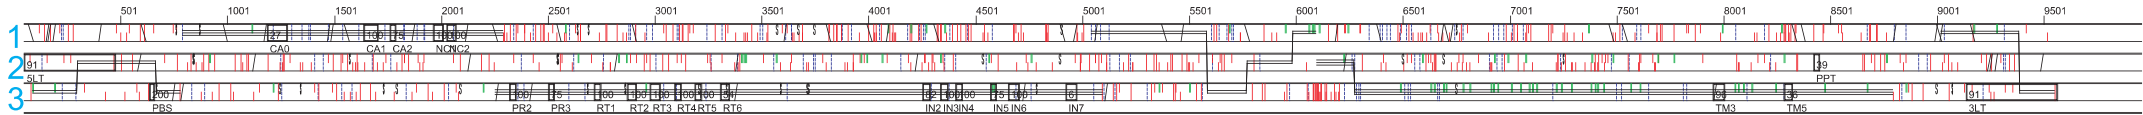

# Spumalike

HFV-NC\_001736

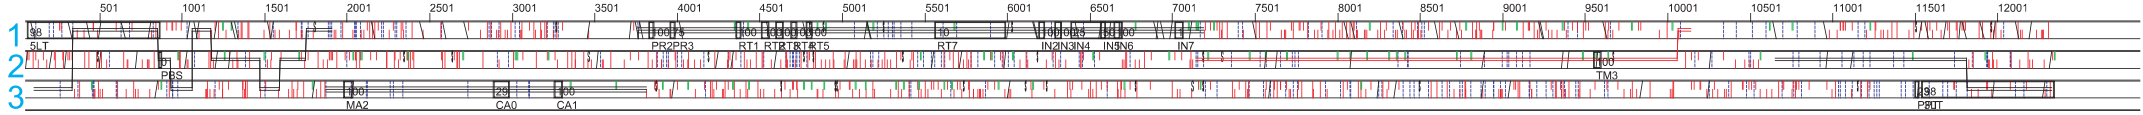

```

{ For RetroTector 1.0
{ Copyright ((c)) 2000-2005, Jonas Blomberg & Göran Sperber. All Rights Reserved.
{ Last changed 2005 12 06
{

```

```

{      !      ! !      !      !      !      !      !      !      !
Motifs::
  1ANN C ABCDELSGO      CA      CA0 050 0.75 CAstartNNData.txt      CA Start NN
  101P D A      CA      CA1 100      adImQGPSESFvdFAnRlikav      RSV
  102P D B      CA      CA1 100      ntVRQGSKEPYpDFVaRLqdVa      HERV-K10
  103P D B      CA      CA1 100      tkIvQGPqEPFsdFVaRmteaa      IAPcri
  104P D B      CA      CA1 100      agLKQGNEESYeTFIsRleeAv      MMTV
  105P D B      CA      CA1 100      tgVKQGPDEPFaDFVhRLitTa      MPMV
  106P D C      CA      CA1 100      rtITQGkDESPAaFMERLLEGF      BAEV
  107P D C      CA      CA1 100      seVIQGkEESPAkFHERLcEAY      HERV E (4-1)
  108P D C      CA      CA1 100      kgITQGPNEESPafLerLkeAy      MuLV
  109P D C      CA      CA1 100      fdIQEKDEGPIrFLdRLkeQm      RTVL-I =HERV-I
  110P D C      CA      CA1 100      teVVQGPGEYPGaFLECLqEAY      S71
  111P D D      CA      CA1 100      asIlQGLEePYhaFVerlnial      HTLV-I
  112P D L      CA      CA1 100      ldIrQGPkEPFrDYVdRfyktl      HIV-1
  113P D G      CA      CA1 100      llNaEVraDALhaFisGLkkal      Gypsy
  114P D G      CA      CA1 100      akktlydevcLnAFisIrepl      Zam
  115P D G      CA      CA1 100      vffapptsvrsselHIGLseip      RIRE3
  116P D S      CA      CA1 100      vYeILGLNarGQsIr      HSRV
  201P D A      CA      CA2 075      aksQpdiQ      RSV
  202P D B      CA      CA2 075      eQATqECR      IAPcr
  203P D B      CA      CA2 075      EnANslCq      MMTV
  204P D B      CA      CA2 075      EdANpaCq      MPMV
  205P D C      CA      CA2 075      qaalDigK      BaEV
  206P D C      CA      CA2 075      QsAPdiGr      MuLV
  207P D C      CA      CA2 075      aQASdirK      S71
  208P D D      CA      CA2 075      SnANkeCq      HTLV-I
  209P D L      CA      CA2 075      QnANpdCk      HIV-1
  210P D G      CA      CA2 075      REAEASIE      Gypsy
  301P D L      DL      DL1 100      GVIDEgyrGEI      FIV
  401P D L      DL      DL2 100      rqKIAqlii      FIV
  501P D B      DU      DU0 100      LPegtvgllLGR      HERVK10
  601P D B      DU      DU1 100      SvVSDyKGEI      HERVK10
  602P D B      DU      DU1 100      GiIDSdytGEI      HML1
  603P D B      DU      DU1 100      GvIDSdfQGEI      MMTV
  701P D B      DU      DU2 100      rDRIAqllll      HERVK10
  702P D B      DU      DU2 100      gERIAvvavt      HML1
  703P D B      DU      DU2 100      gERIAqllll      MMTV
  801P D A      IN      IN1 100      lHvRsHSeVPG      RSV
  802P D B      IN      IN1 100      gHIRAHStLPG      JSRV
  803P D B      IN      IN1 100      tHIRAHtpLPG      HML3
  804P D B      IN      IN1 100      sHicshiqLPG      HML6
  901P D A      IN      IN2 075      dlHtalHig      RSV
  902P D B      IN      IN2 075      elHaltHvn      HERVK10
  903P D B      IN      IN2 075      efHkrfHvt      IAPha
  904P D B      IN      IN2 075      esHalhHqn      MMTV
  905P D C      IN      IN2 100      ldflHqltHlsfskt      MLV

```

|         |             |    |     |     |                    |                 |
|---------|-------------|----|-----|-----|--------------------|-----------------|
| 906P    | D D         | IN | IN2 | 100 | paelHsftHcg        | HTLV-1          |
| 907P    | D L         | IN | IN2 | 100 | AgedHeKyHsn        | HIV-1           |
| 908P    | D S         | IN | IN2 | 100 | vlqaHnlaHtg        | HSRV            |
| 909P    | C G         | IN | IN2 | 100 | lqeahraPyaiHpggtkm | Ananas comosus  |
| 1001P   | D A         | IN | IN3 | 100 | lvksCshCqkt        | LPDV            |
| 1002P   | D A         | IN | IN3 | 100 | vvqtCphCnsa        | RSV             |
| 1003P   | D B         | IN | IN3 | 100 | ivqhCtqCqvl        | HERVK10         |
| 1004P   | D B         | IN | IN3 | 100 | ivtqCqnCcef        | IAPha           |
| 1005P   | D B         | IN | IN3 | 100 | ivksCstCpql        | JSRV            |
| 1006P   | D B         | IN | IN3 | 100 | ivklCpnCpdw        | MMTV            |
| 1007P   | D B         | IN | IN3 | 100 | ivkqCpiCvty        | MPMV            |
| 1008P   | D C         | IN | IN3 | 100 | vtsaCkvCqqvnaga    | BAEV            |
| 1009P   | D C         | IN | IN3 | 100 | itetCkaCaqv        | MLV             |
| 1010P   | D D         | IN | IN3 | 100 | patlCetCqkl        | BLV             |
| 1011P   | D L         | IN | IN3 | 100 | ivasCdkCqlk        | HIV-1           |
| 1012P   | D S         | IN | IN3 | 100 | qlgrCqqClit        | HSRV            |
| 1013P   | C G         | IN | IN3 | 100 | ltplCteqkvqadlgt   | Gypsy           |
| 1100SPA | C ABCDELSGO | IN | IN4 | 025 | !(4)D(51-58)D(35)E | DDE (Integrase) |
| 1201P   | D A         | IN | IN4 | 100 | lWQtDfTlep         | RSV             |
| 1202P   | D B         | IN | IN4 | 100 | lWQmDvTHvp         | HERVK10         |
| 1203P   | D B         | IN | IN4 | 100 | llQkDlTHvp         | HML7            |
| 1204P   | D B         | IN | IN4 | 100 | lWQmDvTHvs         | MMTV            |
| 1205P   | D C         | IN | IN4 | 075 | hWeidfte           | MuLV, motif C   |
| 1206P   | D D         | IN | IN4 | 100 | iWQaDiTHyk         | BLV             |
| 1207P   | D D         | IN | IN4 | 100 | IWQgditH           | HTLV, motif C   |
| 1208P   | D L         | IN | IN4 | 100 | iWqlDcTHle         | HIV-1           |
| 1209P   | C G         | IN | IN4 | 100 | kitmDFVtGlPrSQa    | Ananas comosus  |
| 1301P   | D A         | IN | IN5 | 100 | kTDNgscft          | RSV             |
| 1302P   | D B         | IN | IN5 | 100 | kTDNgpgyc          | HERVK10         |
| 1303P   | D B         | IN | IN5 | 100 | kTDNtpght          | HML3            |
| 1304P   | D B         | IN | IN5 | 100 | kTDNglaya          | HML5            |
| 1305P   | D B         | IN | IN5 | 100 | kiDNgpayt          | HML6            |
| 1306P   | D B         | IN | IN5 | 100 | kTDNnapayv         | MMTV            |
| 1307P   | D B         | IN | IN5 | 100 | ktDNggpY           | MPMV, motif D   |
| 1308P   | D C         | IN | IN5 | 100 | gSDNGPafvSQv       | BAEV            |
| 1309P   | D C         | IN | IN5 | 050 | gTDNgpafv          | MLV             |
| 1310P   | D C         | IN | IN5 | 050 | gtDNgpaF           | MuLV, motif D   |
| 1311P   | D D         | IN | IN5 | 050 | nTDQganyt          | BLV             |
| 1312P   | D D         | IN | IN5 | 050 | ntDNgpaY           | HTLV-I, motif D |
| 1313P   | D L         | IN | IN5 | 075 | hTDNgsnft          | HIV-1           |
| 1314P   | C G         | IN | IN5 | 100 | vSDRDtrFvSh        | Ananas comosus  |
| 1315P   | D S         | IN | IN5 | 050 | hSDQgaaft          | HSRV            |
| 1401P   | D A         | IN | IN6 | 100 | PgNSQGqamVERanrl   | RSV             |
| 1402P   | D B         | IN | IN6 | 100 | PYNSQGqaiVERtnrt   | HERVK10         |
| 1403P   | D B         | IN | IN6 | 100 | LYNPQGqaiVDhthst   | HML5            |
| 1404P   | D B         | IN | IN6 | 100 | PYNPrGqgiiEwahqt   | HML6            |
| 1405P   | D B         | IN | IN6 | 100 | PYNPQGqaiVERahrt   | IAP             |
| 1406P   | D B         | IN | IN6 | 100 | PYHPQGqaiVERthqn   | MMTV            |
| 1407P   | D C         | IN | IN6 | 100 | AYqPQSsgKVERmnrt   | HERV-E          |
| 1408P   | D C         | IN | IN6 | 100 | AYrPQSsgqVERmnrt   | MLV             |

|         |             |     |     |     |                         |                                          |
|---------|-------------|-----|-----|-----|-------------------------|------------------------------------------|
| 1409P   | D D         | IN  | IN6 | 100 | PYNPtSsgldERTngl        | BLV                                      |
| 1410P   | D L         | IN  | IN6 | 100 | PYNPQSQgVVEsmnke        | HIV-1                                    |
| 1411P   | D S         | IN  | IN6 | 100 | PYHPQSGskVERknsd        | HSRV                                     |
| 1412P   | C G         | IN  | IN6 | 100 | afHPQSDgqsERTiqtl       | Ananas comosus                           |
| 1501P   | D C         | IN  | IN7 | 100 | eprWkGPYiVLttpt         | BAEV                                     |
| 1601P   | D A         | MA  | MA1 | 100 | MeaVikVissacktycgkTS    | RSV                                      |
| 1602P   | D C         | MA  | MA1 | 075 | MGQTvtTpls              | MuLV, start of MA                        |
| 1603P   | D C         | MA  | MA1 | 100 | MGNTprKten              | RTVL-Ia, start of MA                     |
| 1604P   | D C         | MA  | MA1 | 100 | MtlgLQThqpk             | HERV-H, RTVLH2, 6 aa before pr           |
| 1605P   | D E         | MA  | MA1 | 075 | MGNssstp                | WDSV                                     |
| 1700ANN | C ABCDELSGO | MA  | MA1 | 025 | 0.87 GagStartNNData.txt | Gag start NN Changed from 0.90 050531    |
| 1801P   | D A         | MA  | MA2 | 100 | APPPYvGsGlyP            | RSV                                      |
| 1802P   | D D         | MA  | MA2 | 100 | iPPPYvepta              | HTLV, end of MA                          |
| 1803P   | D S         | MA  | MA2 | 100 | LRLTeGwWGqierFqmV       | HSRV                                     |
| 1900SPA | C ABCDESLGO | MA  | MA3 | 100 | K(1-5)K(10-25)!PPPY     | Exp Wills acid motif                     |
| 2001P   | D A         | NC  | NC1 | 100 | CytCgspGHyaQC           | RSV                                      |
| 2002P   | D B         | NC  | NC1 | 100 | CfnCgrmGHlkkDC          | IAP                                      |
| 2003P   | D B         | NC  | NC1 | 100 | CfsCgktGHirkDC          | MMTV                                     |
| 2004P   | D B         | NC  | NC1 | 100 | CfkCgkkGHfakNC          | MPMV                                     |
| 2005P   | D C         | NC  | NC1 | 100 | CayrkeiGYwknkC          | HERV-E.4-1                               |
| 2006P   | D C         | NC  | NC1 | 100 | CayCkerGHwikDC          | BAEV                                     |
| 2007P   | D C         | NC  | NC1 | 100 | CyqCgllGHfkkDC          | ERV9                                     |
| 2008P   | D C         | NC  | NC1 | 100 | CayCkekGHwakDC          | MLV                                      |
| 2009P   | D C         | NC  | NC1 | 100 | CtyCkqiGHwkkEC          | S71                                      |
| 2010P   | D D         | NC  | NC1 | 100 | CyrClkeGHwarDC          | BLV                                      |
| 2011P   | D D         | NC  | NC1 | 100 | CfrCgkaGHwsrDC          | HTLV-I                                   |
| 2012P   | D E         | NC  | NC1 | 100 | CFfCKQpGHwKadCPNK       | WDSV                                     |
| 2013P   | D L         | NC  | NC1 | 100 | CynCgkpGHlssQC          | EIAV                                     |
| 2014P   | D L         | NC  | NC1 | 100 | CfnCgkeGHtarNC          | HIV-1                                    |
| 2015P   | D G         | NC  | NC1 | 200 | CrvCgqeGHravRC          | Osvaldo, D buzzatti                      |
| 2016P   | D G         | NC  | NC1 | 200 | CyrCgepGHragAC          | MarY1, T matsutake                       |
| 2017P   | D G         | NC  | NC1 | 200 | CfpCgklVHaiaDC          | peabody, P sativum                       |
| 2101P   | D G         | NC  | NC2 | 200 | CwqCgriGVrtvAC          | Osvaldo, D buzzatti                      |
| 2102P   | D G         | NC  | NC2 | 200 | CfyCkkeGHrlnEC          | TY3, S cerevisiae                        |
| 2103P   | D G         | NC  | NC2 | 200 | CfnCgeeGHigsQC          | peabody, P sativum                       |
| 2104P   | D G         | NC  | NC2 | 200 | CheCqgyGHikaEC          | Endovir1, A thaliana                     |
| 2105P   | D G         | NC  | NC2 | 200 | CfrCnemGHiawNC          | Cer1, C elegans                          |
| 2106P   | D A         | NC  | NC2 | 100 | CqlcngmghnakQC          | RSV                                      |
| 2107P   | D B         | NC  | NC2 | 100 | CyrCgkgyHrasEC          | IAP                                      |
| 2108P   | D B         | NC  | NC2 | 100 | CprCkkyHwksEC           | MMTV                                     |
| 2109P   | D B         | NC  | NC2 | 100 | CprCkrGkHwanEC          | MPMV                                     |
| 2110P   | D D         | NC  | NC2 | 100 | CpiCkdpsHwkrDC          | BLV                                      |
| 2111P   | D D         | NC  | NC2 | 100 | CplCqdpHwkrDC           | HTLV-I                                   |
| 2112P   | D L         | NC  | NC2 | 100 | CfkCkqpGHfkskQC         | EIAV                                     |
| 2113P   | D L         | NC  | NC2 | 100 | CwkCgkeGHqmkDC          | HIV-1                                    |
| 2114P   | D S         | NC  | NC2 | 100 | rpptyQPQRYG             | HHSRV                                    |
| 2115P   | D G         | NC  | NC2 | 100 | CyrCgepGHragAC          | MarY1, T matsutake                       |
| 2201N   | C B         | PBS | PBS | 200 | TGGgccccacgtggggc       | tRNALys12-HSRV, MPMV, SRV1, VILV,        |
| 2202N   | C BC        | PBS | PBS | 200 | TGgccccatggggattg       | tRNAIle-RTVLI, RRHERV-I, HML5, ver020308 |
| 2203N   | C BC        | PBS | PBS | 200 | TGAtggccccatgagga       | tRNAIle-HERV-I, HML5                     |

|         |      |      |     |     |                                 |                                       |
|---------|------|------|-----|-----|---------------------------------|---------------------------------------|
| 2204N   | C BL | PBS  | PBS | 200 | TGGcgccccgaacagggac             | tRNALys3-MMTV,HIV,EIAV,FIV,NMW        |
| 2205N   | C C  | PBS  | PBS | 200 | TGGtgagccagccaggag              | tRNAArg-ERV3, ver020308, Snakehead RV |
| 2206N   | C C  | PBS  | PBS | 200 | TGGttccctggccaggaa              | tRNAGlu-HERVE                         |
| 2207N   | C C  | PBS  | PBS | 200 | TGGtgctgtgactcagat              | tRNAHis-RTVLH, ERVfrd                 |
| 2208N   | C C  | PBS  | PBS | 200 | TGGtgtcagaagtgggat              | tRNALeu-HERVL                         |
| 2209N   | C C  | PBS  | PBS | 200 | TGGtgccgaacccggaa               | tRNAPhe-HERV.F                        |
| 2210N   | C C  | PBS  | PBS | 200 | TGGtgctgagaccggga               | tRNAPhe-IAPm                          |
| 2211N   | C G  | PBS  | PBS | 200 | TGGcgcgagccggaaaact             | tRNASer-ZAM,D melanogaster            |
| 2212N   | C C  | PBS  | PBS | 200 | TGGtgtagtcgtcaggat              | tRNASer-HERV.S                        |
| 2213N   | C C  | PBS  | PBS | 200 | TGGagggccccgctgggat             | tRNAThr-HERV-T                        |
| 2214N   | C C  | PBS  | PBS | 200 | TGGcaaccacgaacggac              | tRNATrp-HERV-W                        |
| 2215N   | C C  | PBS  | PBS | 200 | TTGgcgaccacgaaggga              | tRNATyr                               |
| 2216N   | C C  | PBS  | PBS | 200 | TGGcgaccacgaaggga               | tRNATyr, vs020818                     |
| 2217N   | C CD | PBS  | PBS | 200 | TGGgggctcgtccgggat              | tRNAPro-MLV,HTLV,HuersP               |
| 2218N   | C C  | PBS  | PBS | 200 | TGGtgcatggcgggaa                | tRNAPro-BaEV                          |
| 2219N   | C C  | PBS  | PBS | 200 | TGGgggcttgccctagat              | tRNAPro-HERV-PT47D                    |
| 2220N   | C C  | PBS  | PBS | 200 | TGGgggaccacctgggat              | tRNAThrPro-HERV.ADP                   |
| 2221N   | C O  | PBS  | PBS | 200 | TGGtatcagagcggcactcta           | tRNAxxx-SIRE1/Copia/TY1               |
| 2222N   | C G  | PBS  | PBS | 200 | TGGcgccggtgcccgggga             | tRNAxxx-Cyclops2, P sativum           |
| 2223N   | C G  | PBS  | PBS | 200 | TGGcgctagaaggagggg              | tRNAAsn-Tat1-3, A Thaliana            |
| 2224N   | C G  | PBS  | PBS | 200 | TGGtatcagaacaggtcg              | tRNAMet-Peabody, P sativum            |
| 2225N   | C G  | PBS  | PBS | 200 | TGGtatcagatcttcagg              | tRNAxxx-Cereba, H vulgare             |
| 2226N   | C G  | PBS  | PBS | 200 | TGGtatcagagccccctt              | tRNAMet-RIRE3, O sativa               |
| 2227N   | C G  | PBS  | PBS | 200 | TGGtatcagagcaggcatc             | tRNAMet-Endovir1, A thaliana          |
| 2301P   | D C  | Prot | PR1 | 100 | QGCQGS GAPPEPRLTLVL             | BAEV                                  |
| 2401P   | D A  | Prot | PR2 | 100 | llDSGAdiTi                      | RSV, motif A                          |
| 2402P   | D B  | Prot | PR2 | 100 | llDTGAdkTc                      | MMTV, motif A                         |
| 2403P   | D B  | Prot | PR2 | 100 | liDTGAdvTi                      | MPMV, motif A                         |
| 2404P   | D C  | Prot | PR2 | 100 | TFLVDTGAQH SVLTKAN              | BAEV                                  |
| 2405P   | D C  | Prot | PR2 | 100 | lvDTGAqhSv                      | MuLV, motif A                         |
| 2406P   | D L  | Prot | PR2 | 100 | llDTGAddTv                      | HIV-1, motif A                        |
| 2407P   | D S  | Prot | PR2 | 100 | hwDSGAtiTc                      | HSRV, motif A                         |
| 2501P   | D A  | Prot | PR3 | 075 | ilGRdclq                        | RSV, motif B                          |
| 2502P   | D B  | Prot | PR3 | 075 | lwGRdimk                        | MMTV, motif B                         |
| 2503P   | D C  | Prot | PR3 | 100 | qilGRdvlslrqasisi               | BAEV                                  |
| 2504P   | D C  | Prot | PR3 | 075 | llGRdllt                        | MuLV, motif B                         |
| 2505P   | D D  | Prot | PR3 | 075 | iiGRdalq                        | HTLV, motif B                         |
| 2506P   | D L  | Prot | PR3 | 075 | iiGRnllt                        | HIV-1, motif B                        |
| 2507P   | D S  | Prot | PR3 | 075 | vkGRkvea                        | HSRV, motif B                         |
| 3200SPA | C C  | RT   | RT7 | 010 | !DG(25-50)E(5-30)DS(35-70)N(3)D | RNaseH                                |
| 2601P   | D B  | RT   | RT1 | 100 | wNSlVsvIqK                      | HML4                                  |
| 2602P   | D B  | RT   | RT1 | 100 | wNSPVFvIqK                      | HERVK10                               |
| 2603P   | D B  | RT   | RT1 | 100 | wNSPVFvIKK                      | HML1                                  |
| 2604P   | D B  | RT   | RT1 | 100 | wNSPVFvIKK                      | HML6                                  |
| 2605P   | D B  | RT   | RT1 | 100 | wNtPVFvIKK                      | MMTV                                  |
| 2606P   | C G  | RT   | RT1 | 100 | yNSPtWVvdK                      | Gypsy                                 |
| 2607P   | D B  | RT   | RT1 | 100 | wNtPIFvIKK                      | MPMV                                  |
| 2608P   | D C  | RT   | RT1 | 100 | wNtPl1pVKK                      | MLV                                   |
| 2609P   | D D  | RT   | RT1 | 100 | gNnPVFpVRK                      | BLV                                   |
| 2610P   | D D  | RT   | RT1 | 075 | gNnPVfvpv                       | HTLV-I, motif ax                      |

|       |     |    |     |     |                 |                |
|-------|-----|----|-----|-----|-----------------|----------------|
| 2611P | D L | RT | RT1 | 100 | yNtPVFaIKK      | HIV-1          |
| 2612P | D S | RT | RT1 | 100 | mNtPVYpVpK      | HSRV           |
| 2701P | D A | RT | RT2 | 100 | iamDIsDcFFsiPL  | LPDV           |
| 2702P | D B | RT | RT2 | 100 | iiiDLkDcFFtipl  | HERVK10        |
| 2703P | D B | RT | RT2 | 100 | iviDLkDcFFtipl  | HML1           |
| 2704P | D B | RT | RT2 | 100 | vviDLkDcFFttpl  | HML6           |
| 2705P | D B | RT | RT2 | 100 | iiiDLqDcFFnikL  | MMTV           |
| 2706P | D C | RT | RT2 | 100 | svlHLkDaFFtiPL  | HERV-H         |
| 2707P | D C | RT | RT2 | 100 | svldfkNFFciPL   | ERVfrd         |
| 2708P | D C | RT | RT2 | 100 | tviDLkvdFgmpPg  | ERVftd         |
| 2709P | D C | RT | RT2 | 100 | tvldLkDaFFclrL  | MLV            |
| 2710P | D D | RT | RT2 | 100 | icldLkDaFFqiPL  | BLV            |
| 2711P | D D | RT | RT2 | 100 | qtiDlrDaFF      | HTLV-I,motif A |
| 2712P | C G | RT | RT2 | 100 | ttLDLksgYHqiYL  | Gypsy          |
| 2713P | D E | RT | RT2 | 100 | tviDlsNaFFsvPi  | WDSV           |
| 2714P | D L | RT | RT2 | 100 | tvldVgDaYFsvPL  | HIV-1          |
| 2715P | D S | RT | RT2 | 100 | ttldlaNgFWahPI  | HSRV           |
| 2716P | D S | RT | RT2 | 100 | aaiDLaNgl1piPa  | HERV-L         |
| 2801P | D A | RT | RT3 | 100 | rFqWkVLPQGmtcSP | RSV            |
| 2802P | D B | RT | RT3 | 100 | rFqWkVLPQGmlnSP | HERVK10        |
| 2803P | D B | RT | RT3 | 100 | kYhWkVLPQGmlnSP | HML1           |
| 2804P | D B | RT | RT3 | 100 | hyqWrVLPQGmlnSl | HML6           |
| 2805P | D B | RT | RT3 | 100 | rFqWkVLPQGmknSP | MMTV           |
| 2806P | D C | RT | RT3 | 100 | qltWtrLPQGfknSP | MLV            |
| 2807P | D C | RT | RT3 | 100 | tismdsLaQGftdSP | ERVftd         |
| 2808P | D L | RT | RT3 | 100 | rYqYnVLPQGwkgSP | HIV-1          |
| 2809P | D S | RT | RT3 | 100 | qycWtrLPQGflnSP | HSRV           |
| 2810P | D S | RT | RT3 | 100 | qciFTvLlQGyinSP | HERV-L         |
| 2811P | D G | RT | RT3 | 100 | kyeFcrLPfGlrnas | Gypsy          |
| 2901P | D A | RT | RT4 | 100 | lhYmDDLlla      | RSV            |
| 2902P | D B | RT | RT4 | 100 | ihYiDDILca      | HERVK10        |
| 2903P | D B | RT | RT4 | 100 | ihYmDDILca      | HML1           |
| 2904P | D B | RT | RT4 | 100 | ihYmDDILlla     | HML6           |
| 2905P | D B | RT | RT4 | 100 | vhYmDDILlla     | MMTV           |
| 2906P | D C | RT | RT4 | 100 | lqYvDDLlla      | MLV            |
| 2907P | D D | RT | RT4 | 100 | vsYmDDIlya      | BLV            |
| 2908P | D L | RT | RT4 | 100 | yqYmDDLlyvg     | HIV-1          |
| 2909P | D S | RT | RT4 | 100 | qvYvDDIyls      | HSRV           |
| 2910P | C G | RT | RT4 | 100 | yvYvDDIyls      | Gypsy          |
| 3001P | D A | RT | RT5 | 100 | GlkineaKtQ      | LPDV           |
| 3002P | D A | RT | RT5 | 100 | GftispdKvQ      | RSV            |
| 3003P | D B | RT | RT5 | 100 | GlaiasdKiQ      | HERVK10        |
| 3004P | D B | RT | RT5 | 100 | GlviapdKiQ      | HML1           |
| 3005P | D B | RT | RT5 | 100 | GleiaseKvQ      | IAPha          |
| 3006P | D B | RT | RT5 | 100 | GlvvsteKiQ      | MMTV           |
| 3007P | D B | RT | RT5 | 100 | GlhiapeKvQ      | MPMV           |
| 3008P | D C | RT | RT5 | 100 | GyrasakKaQ      | MLV            |
| 3009P | D D | RT | RT5 | 100 | GfqvaseKtS      | BLV            |
| 3010P | D L | RT | RT5 | 100 | GlttpdkKhQ      | HIV-1          |
| 3011P | D S | RT | RT5 | 100 | GyvvsIkKse      | HSRV           |

|         |             |      |     |     |                                 |                                           |
|---------|-------------|------|-----|-----|---------------------------------|-------------------------------------------|
| 3012P   | C G         | RT   | RT5 | 100 | nmrvsqeKtrFFke                  | Gypsy                                     |
| 3101P   | D B         | RT   | RT6 | 100 | TLNDFQKLLgDInW                  | MMTV                                      |
| 3102P   | D B         | RT   | RT6 | 100 | TLwDvQKLVgslqW                  | RSV                                       |
| 3103P   | C G         | RT   | RT6 | 100 | DPeKvKAIQEYPeP                  | Gypsy                                     |
| 3200SPA | C C         | RT   | RT7 | 010 | !DG(25-50)E(5-30)DS(35-70)N(3)D | RNaseH                                    |
| 3301P   | D B         | SU   | SU2 | 100 | WmdnpTeVYvndsvW                 | HERVK10                                   |
| 3302P   | D B         | SU   | SU2 | 100 | WsdalseIYhdqgaW                 | HML-6.29                                  |
| 3303P   | D B         | SU   | SU2 | 100 | WdreivpVYvndtsL                 | JSRV                                      |
| 3304P   | D L         | SU   | SU2 | 025 | YkGiflWR                        | CAEV                                      |
| 3401P   | D B         | SU   | SU3 | 100 | KRdfgItAAMI IAI                 | IAPm                                      |
| 3402P   | D C         | SU   | SU3 | 100 | RRalgmii faiv                   | HML6.17                                   |
| 3403P   | D C         | SU   | SU3 | 100 | KRgiviGnWkdnew                  | HERV-E                                    |
| 3404P   | C C         | SU   | SU3 | 100 | KRepvsltlalllg                  | MuLV                                      |
| 3405P   | C C         | SU   | SU3 | 100 | KrviplitlmvglgL                 | HERV-H RGH2 VIPLITLMVGLGL                 |
| 3406P   | D D         | SU   | SU3 | 100 | RRavpvAVwLvsAL                  | HTLV-1                                    |
| 3407P   | D E         | SU   | SU3 | 100 | KRdlG1HStLNSWWN                 | WDSV                                      |
| 3501P   | D C         | TM   | TM1 | 050 | SQMAWENKIAL                     | HERV I                                    |
| 3601P   | D B         | TM   | TM2 | 100 | rqtviwmgdrLmslehrfqlqC          | HERV K10                                  |
| 3602P   | D B         | TM   | TM2 | 100 | ydvvrVlgeqvqsinfmkiqC           | JSRV                                      |
| 3603P   | D B         | TM   | TM2 | 100 | eevVlelggdvanlkrmstrC           | MMTV                                      |
| 3701P   | D A         | TM   | TM3 | 100 | lqnraAIDFLllahghgC              | ASLV                                      |
| 3702P   | D B         | TM   | TM3 | 100 | LksmVlwlgeqV                    | HML6.17                                   |
| 3703P   | D B         | TM   | TM3 | 100 | LdlaeEqIGVLhqmaQLgC             | IAPm                                      |
| 3704P   | D C         | TM   | TM3 | 100 | yQNRlALDYLLA                    | HERV E/ERV3                               |
| 3705P   | D C         | TM   | TM3 | 100 | lQNhRGLDlLTAekGGLCifLE          | HERV H/ERV9                               |
| 3706P   | D C         | TM   | TM3 | 100 | lQNrRGLDmLTAaqGGICLaLD          | HERVES02A                                 |
| 3707P   | D E         | TM   | TM3 | 100 | GCFiPkHpWsAG                    | WDSV                                      |
| 3708P   | D L         | TM   | TM3 | 100 | lQArVLAVERYLKDQQQL              | HIV-1 MN                                  |
| 3709P   | D S         | TM   | TM3 | 100 | vnPLKNGSYLvlAs                  | HSRV                                      |
| 3800SPA | C ABCDELSGO | TM   | TM4 | 035 | L(6)L(6)L(6)L(0-5)!C(4-15)C     | Heptad repeat-CC                          |
| 3900HYF | C ABCDESLGO | TM   | TM5 | 065 | X                               | hydrophobic motif, changed from 60 050531 |
| 4000LTR | D ABCDESLGO | 5LTR | 5LT | 300 | X                               | 5'LTR                                     |
| 4001LTR | D ABCDESLGO | 3LTR | 3LT | 300 | X                               | 3'LTR                                     |
| 4100PPT | C ABCDESLGO | PPT  | PPT | 050 | X                               | PPT motif                                 |

::

LTR1Motifs::

|       |     |      |      |     |                                 |                                |
|-------|-----|------|------|-----|---------------------------------|--------------------------------|
| 5001N | D B | ???? | ???? | 100 | AATGGATTAAGGGCGGTGCAaGATGTGCTT  | HERV-K, U3                     |
| 5002N | D B | ???? | ???? | 100 | TTGGCAAAAGCCAAAGCCTAGGACAAATAC  | JSRV, U3 (NF-1 like)           |
| 5003N | D C | ???? | ???? | 100 | CTTTGTtTcCTgcTTTCAAgCCagACTTC   | RTVL Ia, U3                    |
| 5004N | D C | ???? | ???? | 100 | TAYACRtCCAGATGGCCagAAGTAACTGAA  | RTVL-H consensus, U3           |
| 5005N | D S | ???? | ???? | 100 | CTTGATtGtAtTGAAGGATGCAAAGcATTG  | HERV-L, 5'and 3'versions of U3 |
| 5006N | D S | ???? | ???? | 100 | GCAGCCAGGCAGGCATAGGCTGAAGTAAAC  | HERV-S U5                      |
| 5007N | D C | ???? | ???? | 100 | TTCACCTTGATCAAAAACCACCAAATCCA   | HERV-F U3                      |
| 5008N | D C | ???? | ???? | 100 | CCAgGAATgTCAGGTGACCATcAGgTGAT   | HERV-FRD U3                    |
| 5009N | D B | ???? | ???? | 100 | TTATAGAAAGAAGCAAACCTTCTTGGAAATG | HML5 U3                        |
| 5010N | D C | ???? | ???? | 100 | TAAGTACTGGCAGCCAGCCTGCGGATGTGA  | HERV.ADP U3                    |

::

LTR2Motifs::

|       |     |      |      |     |                                |            |
|-------|-----|------|------|-----|--------------------------------|------------|
| 5101N | D B | ???? | ???? | 100 | CCACCTtACGAGAAACACCCACAGGTGTGt | HERV-K, U5 |
| 5102N | D B | ???? | ???? | 100 | TTCTtCCCTGTGCAGGTGCGACTCTTGTt  | JSRV, U5   |

|                         |             |      |      |     |                                |                                        |
|-------------------------|-------------|------|------|-----|--------------------------------|----------------------------------------|
| 5103N                   | D C         | ???? | ???? | 100 | yTTrTGCTCACACAAAGCCTGTTTGGTCT  | HERV-H consensus, U5                   |
| 5104N                   | D C         | ???? | ???? | 100 | TTCTGCAaAAGTAAATTTGCCTTGCTGAGA | RTVL Ia, U5                            |
| 5105N                   | D S         | ???? | ???? | 100 | TACTAGTTCTGTCCCTcTAGAGAACCTTGA | HERV-L, U5                             |
| 5106N                   | D S         | ???? | ???? | 100 | CATCTACCTGCTGTCTCTCAAGTGTTT    | HERV-S U3                              |
| 5107N                   | D C         | ???? | ???? | 100 | TTTACTGTTGAGCCATTTTCATGTT      | HERV-F U3                              |
| 5108N                   | D C         | ???? | ???? | 100 | ACTCTgCCTTATACAAGTaAGaTgAATTCT | HERV-FRD U5                            |
| 5109N                   | D B         | ???? | ???? | 100 | AACTCTTTACAGCACACTcTTgGGTGT    | HML5 U5                                |
| 5110N                   | D C         | ???? | ???? | 100 | GAGTCCATTcTTGgGTTTGGttggGTGAA  | HERV.ADP U5                            |
| ::                      |             |      |      |     |                                |                                        |
| KozakMotif::            |             |      |      |     |                                |                                        |
| 8000N                   | D ABCDESLGO | ???? | ???? | 100 | gccaccATGg                     | Kozak consensus                        |
| ::                      |             |      |      |     |                                |                                        |
| SpliceAcceptorMotif::   |             |      |      |     |                                |                                        |
| 8100SPL                 | C ABCDESLGO | ???? | ???? | 100 | ttnctag                        | Splice acceptor consensus              |
| ::                      |             |      |      |     |                                |                                        |
| SpliceDonorMotif::      |             |      |      |     |                                |                                        |
| 8110SPD                 | C ABCDESLGO | ???? | ???? | 100 | caggtaagt                      | Splice donor consensus                 |
| ::                      |             |      |      |     |                                |                                        |
| SlipperyMotif::         |             |      |      |     |                                |                                        |
| 8200SLI                 | C ABCDESLGO | ???? | ???? | 100 | xxxxyy                         | Slippery sequence                      |
| ::                      |             |      |      |     |                                |                                        |
| ProteaseCleavageMotif:: |             |      |      |     |                                |                                        |
| 8300PCS                 | C ABCDESLGO | ???? | ???? | 100 | wPf fPv yPi                    | Protease cleavage site                 |
| ::                      |             |      |      |     |                                |                                        |
| PseudoKnotMotif::       |             |      |      |     |                                |                                        |
| 8400PKN                 | C ABCDESLGO | ???? | ???? | 100 | X                              | Pseudoknot motif                       |
| ::                      |             |      |      |     |                                |                                        |
| ComponentMotifs::       |             |      |      |     |                                |                                        |
| 8900SLI                 | C ABCDESLGO | ???? | ???? | 100 | xxxxyy                         | Slippery sequence                      |
| 8901PKN                 | C ABCDESLGO | ???? | ???? | 100 | X                              | Pseudoknot motif                       |
| ::                      |             |      |      |     |                                |                                        |
| FrameShifterMotif::     |             |      |      |     |                                |                                        |
| 8500COI                 | C ABCDESLGO | ???? | ???? | 100 | 8900 8901 12<16                | Coincidence of slippery and pseudoknot |
| ::                      |             |      |      |     |                                |                                        |
| RMotif::                |             |      |      |     |                                |                                        |
| 8600R                   | C ABCDESLGO | ???? | ???? | 100 | X                              | Motif for R part of LTR                |
| ::                      |             |      |      |     |                                |                                        |
| NotInUse::              |             |      |      |     |                                |                                        |
| 9100SSQ                 | C ABCDESLGO | SU   | SU1  | 060 | X                              | von Heijne weight matrix               |
| ::                      |             |      |      |     |                                |                                        |



# Supplementary Information: RetroTector<sup>©</sup> Output

HERV-Fc1 (AL354685)

---

## **1. LTRID**

## **2. RetroVID**

## **3. ORFID**

### **3.1. ORFID-Gag**

3.1.1. Gag Putein

### **3.2. ORFID-Pro**

3.2.1. Pro Putein

### **3.3. ORFID-Pol**

3.3.1. Pol Putein

### **3.4. ORFID-Env**

3.4.1. Env Putein

## **4. XonID**

## **5. Chainview**

# 1. LTRID

---

```
Executor: LTRID
DNAFile: HERV-Fc1-AL354685_1.txt
{ Created by SweepDNA with parameters
{ NewDNADirectory: NewDNA
{ ExecutorToUse: LTRID
{ ChunkOverlap: 15000
{ LINETolerance: 10
{ ALUTolerance: 10
{ ChunkSize: 115000
{ and plugins
{ LTRAlign
{ LTRhistogram
{ ComplementDNA
{ LTRImprover
{ Belongs in C:\Retrotector\RetroTector10\Workplace\HERV-Fc1-AL354685\HERV-Fc1-AL354685_1
{ Created "DATE/TIME" under RetroTector version 1.0 "DATE"
{ using Database:Ordinary last modified "DATE/TIME"
```

## 2. RetroVID

---

Executor: RetroVID  
DNAFile: HERV-Fc1-AL354685\_1.txt  
Database: Ordinary  
P1\_LTRpair::  
  PairFactor: 0.324  
  RepeatLength: 5  
  IntegrationSites: aaaat/tg<>ca/aaaat  
::  
P1\_5LTR::  
  ScoreFactor: 0.162  
  VirusGenus: C  
  First: 40963  
  Last: 41338  
  Hotspot: 1.0 1.0 41257 AATAAA  
  U5NN: 0.4 2.0 41268  
  GTModifier: 0.41 1.0  
  U3NN: 0.9 1.0 41115  
  TATAA: 1.0 1.0 41169  
  MEME50: 0.55 1.0 41144  
  Motifs1: 1.17 4.0 41122  
  Motifs2: 1.43 4.0 41275  
  Transsites: 0.2 1.0  
  CpGModifier: 0.58 1.0  
  Spl8Modifier: 0.21 1.0  
  ShortDescription:  
AATAAA(41257);U5NN:0.2(41268);GT:0.41;U3NN:0.9(41115);TATAA:1.0(41169);MEME50:0.55(41144);Mot1:0.29(41122);Mot2:0.36(41275);Trans:0.2;CpG:0.58;Spl8:0.21;  
::  
P1\_3LTR::  
  ScoreFactor: 0.162  
  VirusGenus: CS  
  First: 48536  
  Last: 48905  
  Hotspot: 1.0 1.0 48824 AATAAA  
  U5NN: 0.44 2.0 48835  
  GTModifier: 0.34 1.0  
  U3NN: 0.88 1.0 48665  
  TATAA: 1.0 1.0 48736  
  MEME50: 0.58 1.0 48711  
  Motifs1: 1.2 4.0 48642  
  Motifs2: 1.16 4.0 48833  
  Transsites: 0.3 1.0  
  CpGModifier: 0.72 1.0  
  Spl8Modifier: 0.24 1.0  
  ShortDescription:  
AATAAA(48824);U5NN:0.22(48835);GT:0.34;U3NN:0.88(48665);TATAA:1.0(48736);MEME50:0.58(48711);Mot1:0.3(48642);Mot2:0.29(48833);Trans:0.3;CpG:0.72;Spl8:0.24;  
::  
SingleLTR\_S1::  
  ScoreFactor: 0.181  
  VirusGenus: CS  
  First: 70136  
  Last: 68338  
  Hotspot: 1.0 1.0 68952 AGTAAA  
  U5NN: 0.71 2.0 68758  
  GTModifier: 0.95 1.0  
  U3NN: 0.9 1.0 69820  
  TATAA: 0.84 1.0 68997  
  MEME50: 0.56 1.0 69895  
  Motifs1: 1.43 4.0 69212  
  Motifs2: 1.49 4.0 68966  
  Transsites: 0.31 1.0  
  CpGModifier: 0.18 1.0

```

Spl8Modifier: 0.5 1.0
ShortDescription:
AGTAAA(68952);U5NN:0.35(68758);GT:0.95;U3NN:0.9(69820);TATAA:0.84(68997);MEME50:0.56(69895);Mot1:0.36(
69212);Mot2:0.37(68966);Trans:0.31;CpG:0.18;Spl8:0.5;_catgctg/tg<>ca/catgctg
::
SingleLTR_S2::
ScoreFactor: 0.185
VirusGenus: BC
First: 66266
Last: 64804
Hotspot: 1.0 1.0 65648 ATTTAA
U5NN: 0.63 2.0 65544
GTModifier: 0.67 1.0
U3NN: 0.9 1.0 66098
TATAA: 1.0 1.0 65847
MEME50: 0.56 1.0 64938
Motifs1: 1.8 4.0 66003
Motifs2: 1.56 4.0 65679
Transsites: 0.21 1.0
CpGModifier: 0.14 1.0
Spl8Modifier: 0.55 1.0
ShortDescription:
ATTTAA(65648);U5NN:0.31(65544);GT:0.67;U3NN:0.9(66098);TATAA:1.0(65847);MEME50:0.56(64938);Mot1:0.45(66
003);Mot2:0.39(65679);Trans:0.21;CpG:0.14;Spl8:0.55;_caaataaa/tg<>ca/caaataaa
::
{ Created by LTRID with parameters
{ Motifs2Weight: 4.0
{ Motifs1Weight: 4.0
{ U5NetWeight: 2.0
{ SplitOctamerWeight: 1.0
{ LINELTRTolerance: 10.0
{ DNAFile: HERV-Fc1-AL354685_1.txt
{ U3NetWeight: 1.0
{ DOSingleLTRs: Yes
{ InputFile:
{ Debugging: No
{ MEME50Weight: 1.0
{ CpGWeight: 1.0
{ TransSitesWeight: 1.0
{ MaxPairsOutput: 50
{ Database: Ordinary
{ TATAAWeight: 1.0
{ AATAAAWeight: 1.0
{ SingleLTRThreshold: 0.18
{ ScriptPath: C:\Retrotector\RetroTector10\Workplace\HERV-Fc1-AL354685\HERV-Fc1-
AL354685_1\LTRID_001Script_.txt
{ ExponentStrength: 2.0
{ LTRRepTolerance: 7.0
{ GTWeight: 1.0
{ and plugins
{ LTRAlign
{ LTRhistogram
{ ComplementDNA
{ LTRImprover
{ Execution time was 50873 milliseconds
{ Latecoming LTRCandidates: 4
{ Belongs in C:\Retrotector\RetroTector10\Workplace\HERV-Fc1-AL354685\HERV-Fc1-AL354685_1
{ Created "DATE/TIME" under RetroTector version 1.0 "DATE"
{ using Database:Ordinary last modified "DATE/TIME"

```

### 3. ORFID

---

```
Executor: ORFID
DNAFile: HERV-Fc1-AL354685_1.txt
Strand: Primary
Database: Ordinary
VirusGenus: C
GeneScripts::
ORFID_P00001CGag_001Script.txt
ORFID_P00001CPro_001Script.txt
ORFID_P00001CPol_001Script.txt
ORFID_P00001CEnv_001Script.txt
::
{ Created by RetroVID with parameters
{ FrameFactor: 1.5
{ ImproveHitsMax: 5
{ MaxSubGeneSkip: 4
{ DNAFile: HERV-Fc1-AL354685_1.txt
{ InputFile:
{ Debugging: No
{ FinalSelectionThreshold: 150.0
{ MakeChainsFiles: 0
{ BrokenPenalty: 0.9
{ Database: Ordinary
{ Strand: Both
{ SDFactor: 5.5
{ ORFIDMinScore: 200
{ KeepThreshold: 25.0
{ LengthBonus: 1.02
{ BrokenPasses: 1
{ ConservationFactor: 2
{ ScriptPath: C:\Retrotector\RetroTector10\Workplace\HERV-Fc1-AL354685\HERV-Fc1-
AL354685_1\RetroVID_001Script.txt
{ SubGeneHitsMax: 5
{ SelectionThreshold: 100.0
{ FitPuteins: Yes
{ and plugins
{ LTRAlign
{ LTRhistogram
{ ComplementDNA
{ LTRImprover
{ Execution time was 49532 milliseconds
{ Belongs in C:\Retrotector\RetroTector10\Workplace\HERV-Fc1-AL354685\HERV-Fc1-AL354685_1
{ Created "DATE/TIME" under RetroTector version 1.0 "DATE"
{ using Database:Ordinary last modified "DATE/TIME"
```

### 3.1. ORFID-Gag

---

Executor: ORFID  
DNAFile: HERV-Fc1-AL354685\_1.txt  
Strand: Primary  
Database: Ordinary  
VirusGenus: C  
Gene: Gag  
FirstDNAStart: 41122  
LastDNAStart: 41892  
ChainNumber: 00001  
FirstDNAEnd: 43141  
LastDNAEnd: 43510  
HitInfo::  
42029 14 CA0 ANN ABCDELSGO #CAStartNNData.txt\_\_\_\_\_ CA Start NN  
42059 20 MA2 P D #iPPPYvepta HTLV, end of MA  
42641 44 CA1 P C #teVVQGPGEYPGaFLECLqEAY S71  
43025 54 NC1 P D #CyrClkeGHwarDC BLV  
43094 42 NC2 P D #CplCqdpHwkrDC HTLV-I  
::  
{ Created by RetroVID with parameters  
{ FrameFactor: 1.5  
{ ImproveHitsMax: 5  
{ MaxSubGeneSkip: 4  
{ DNAFile: HERV-Fc1-AL354685\_1.txt  
{ InputFile:  
{ Debugging: No  
{ FinalSelectionThreshold: 150.0  
{ MakeChainsFiles: 0  
{ BrokenPenalty: 0.9  
{ Database: Ordinary  
{ Strand: Both  
{ SDFactor: 5.5  
{ ORFIDMinScore: 200  
{ KeepThreshold: 25.0  
{ LengthBonus: 1.02  
{ BrokenPasses: 1  
{ ConservationFactor: 2  
{ ScriptPath: C:\Retrovector\RetroTector10\Workplace\HERV-Fc1-AL354685\HERV-Fc1-AL354685\_1\RetroVID\_001Script\_.txt  
{ SubGeneHitsMax: 5  
{ SelectionThreshold: 100.0  
{ FitPuteins: Yes  
{ and plugins  
{ LTRAlign  
{ LTRhistogram  
{ ComplementDNA  
{ LTRImprover  
{ Execution time was 49522 milliseconds  
{ Belongs in C:\Retrovector\RetroTector10\Workplace\HERV-Fc1-AL354685\HERV-Fc1-AL354685\_1  
{ Created "DATE/TIME" under RetroTector version 1.0 "DATE"  
{ using Database:Ordinary last modified "DATE/TIME"



|||||  
1111

! < ! ! ! >! !  
! <  
41122 41212 41302 41392 41482 41572 41663  
41753 41843 41933 42023 42113 42203 42293  
42383 42473 42563 42653 42743 42833 42923  
43013 43103 43193 43283 43373 43463

::

Hits::

1 42029 14 CA0 ANN ABCDELSGO #CAStartNNDData.txt \_\_\_\_\_ CA Start NN  
2 42059 20 MA2 P D #iPPPYvepta HTLV, end of MA  
3 42641 44 CA1 P C #teVVQGPGE XPGaFLECLqEAY S71  
4 43025 54 NC1 P D #CyrClkeGHwarDC BLV  
5 43094 42 NC2 P D #CplCqdpHwkrDC HTLV-I

::

{ Created by ORFID with parameters  
{ NonAlignedScore: 0.4  
{ GlycosylationFactor: 0.2  
{ StopCodonFactor: -0.4  
{ LastDNAEnd: 43510  
{ NonORFHexamerFactor: -0.1  
{ MotifHitFactor: 0.2  
{ DNAFile: HERV-Fc1-AL354685\_1.txt  
{ VirusGenus: C  
{ StopCodonValue: -15  
{ MasterSkipPenalty: -0.2  
{ InORFBonus: 0.1  
{ OutputFile: ORFIDout\_P00001CGag\_001.txt  
{ InputFile:  
{ MinHitScore: 15  
{ Debugging: No  
{ Strand: Primary  
{ Database: Ordinary  
{ Gene: Gag  
{ PuteinFile: Putein\_P00001CGag\_001.txt  
{ ORFHexamerFactor: 0.2  
{ ChainNumber: 00001  
{ FirstDNASTart: 41122  
{ ScriptPath: C:\Retrorector\RetroTector10\Workplace\HERV-Fc1-AL354685\HERV-Fc1-AL354685\_1\ORFID\_P00001CGag\_001Script.txt  
{ FirstDNAEnd: 43141  
{ LastDNAStart: 41892  
{ MinAverageScore: 20  
{ FrameShiftFactor: -1.5  
{ ScoreFactor: 0.1  
{ and plugins  
{ LTRAlign  
{ LTRHistogram  
{ ComplementDNA  
{ LTRImprover  
{ Execution time was 8823 milliseconds  
{ Belongs in C:\Retrorector\RetroTector10\Workplace\HERV-Fc1-AL354685\HERV-Fc1-AL354685\_1  
{ Created "DATE/TIME" under RetroTector version 1.0 "DATE"  
{ using Database:Ordinary last modified "DATE/TIME"



## 3.2. ORFID-Pro

---

Executor: ORFID  
DNAFile: HERV-Fc1-AL354685\_1.txt  
Strand: Primary  
Database: Ordinary  
VirusGenus: C  
Gene: Pro  
FirstDNAStart: 42545  
LastDNAStart: 43283  
ChainNumber: 00001  
FirstDNAEnd: 43538  
LastDNAEnd: 43817  
HitInfo::  
43310 22 PR2 P C #lvDTGAqhSv MuLV, motif A  
43502 40 PR3 P C #lIGRdllt MuLV, motif B  
::  
{ Created by RetroVID with parameters  
{ FrameFactor: 1.5  
{ ImproveHitsMax: 5  
{ MaxSubGeneSkip: 4  
{ DNAFile: HERV-Fc1-AL354685\_1.txt  
{ InputFile:  
{ Debugging: No  
{ FinalSelectionThreshold: 150.0  
{ MakeChainsFiles: 0  
{ BrokenPenalty: 0.9  
{ Database: Ordinary  
{ Strand: Both  
{ SDFactor: 5.5  
{ ORFIDMinScore: 200  
{ KeepThreshold: 25.0  
{ LengthBonus: 1.02  
{ BrokenPasses: 1  
{ ConservationFactor: 2  
{ ScriptPath: C:\Retrotector\RetroTector10\Workplace\HERV-Fc1-AL354685\HERV-Fc1-AL354685\_1\RetroVID\_001Script\_.txt  
{ SubGeneHitsMax: 5  
{ SelectionThreshold: 100.0  
{ FitPuteins: Yes  
{ and plugins  
{ LTRAlign  
{ LTRhistogram  
{ ComplementDNA  
{ LTRImprover  
{ Execution time was 49522 milliseconds  
{ Belongs in C:\Retrotector\RetroTector10\Workplace\HERV-Fc1-AL354685\HERV-Fc1-AL354685\_1  
{ Created "DATE/TIME" under RetroTector version 1.0 "DATE"  
{ using Database:Ordinary last modified "DATE/TIME"

### 3.2.1. Pro Putein

---

Executor: Puteinview  
NumberOfHits: 2  
LeadingInfo::

Leading path in Pro  
Starts at=43229  
Putein string of length=27 and total score=21.414242  
RGPDSGTPITLAEPRVTLQVAGKSISF  
yielding average=0.76479435  
Inside limits=1.0  
For fit to alignment 0.5\*3.0  
For cleavage site=0.1777778\*0.5  
Yielding path score = 2.3536832  
::  
TrailingInfo::

Trailing path in Pro  
Ends at=43633  
Putein string of length=44 and total score=35.494114  
LfGRDLLSKLgASIRlhpsSaiSILpLLALSdDTpSPIpLL  
yielding average=0.7887581  
Inside limits=1.0  
For fit to alignment 0.5111114\*3.0  
For cleavage site=0.5777778\*0.5  
Yielding path score = 2.6109805  
::

Gene: Pro  
Genus: c  
DNAFile: HERV-Fc1-AL354685\_1.txt  
EstimatedStartPosition: 43229  
EstimatedLastPosition: 43633  
LengthInside: 135  
LengthTotal: 423  
AlignedAcids: 112  
AverageScoreInside: 0.7049479  
AverageScoreTotal: 0.22498336  
MostUsedRow: 1 (HERV\_E\_4\_1\_Troliq\_POL\_M10976)  
StopCodonsInside: 0(0, 4, 5)  
StopCodonsTotal: 2  
AmbiguousAcidsInside: 0  
AmbiguousAcidsTotal: 0  
ShiftsInside: 0  
ShiftsTotal: 0  
LongestRun: 135 at 43229  
{ Starts at position 42545, ends at 43814  
LongestORF: 43229  
rgpdsgtpltlaeprvtlqvagksisflvhmgatysvlpsfgvssfpvptvvgidgtpsthrqtppplscllddtlshsflhipscpvllfgrdllsklgasirhlpsl  
pssaisllplllalsddtspipll>>  
Putein::

1 \_\_\_\_\_

2 \_\_\_\_\_

gqgrrrrdqmvqcllasmqaasnktvnfdklreiiqgsdenpavflncltealiqytrldptspagatvlathvisqsagdirkkkkveegpqtpiqdlvkmaf  
rvynsreetaeaaqrqarlkkqvqfqtqalvaaprlagsgsqpkggsghrappgacfkcgneghwazqcpypkeptrpcpnchqmgghwksecpvsgastv  
plrcensettggafllsmdddzrgpDSGtplTlaEPRVTLqVaGKsIsFLVhmGAtySVLpSfGVSSfppspVTVvGidgTpSthRQt  
PppLSCrLddTIIshSFLiiPsCPVILfGRDLLSKLgASIRlhpsSaiSILpLLaLsddTpspIplLpvvpdpivwdistsiarhha  
pimikldptkfprrpqpisvehrqglkpiitrllqqh



### 3.3. ORFID-Pol

---

Executor: ORFID  
DNAFile: HERV-Fc1-AL354685\_1.txt  
Strand: Primary  
Database: Ordinary  
VirusGenus: C  
Gene: Pol  
FirstDNAStart: 43039  
LastDNAStart: 43737  
ChainNumber: 00001  
FirstDNAEnd: 46645  
LastDNAEnd: 46997  
HitInfo::  
43838 32 RT1 P C #wNtPllpVKK MLV  
43994 67 RT2 P C #svlHLkDaFFtiPL HERV-H  
44099 66 RT3 P C #qltWtrLPQGfknSP MLV  
44207 60 RT4 P C #lqYvDDLlla MLV  
44300 22 RT5 P C #GyrasakKaQ MLV  
45831 18 IN3 P C #vtsaCkvCqqvnaga BAEV  
45930 26 IN4 P C #hWeidfte MuLV, motif C  
46110 63 IN5 P C #gSDNGPafvSQv BAEV  
46194 60 IN6 P C #AYqPQSsgKVERmnr HERV-E  
46584 57 IN7 P C #eprWkGPYiVLttpt BAEV  
::  
{ Created by RetroVID with parameters  
{ FrameFactor: 1.5  
{ ImproveHitsMax: 5  
{ MaxSubGeneSkip: 4  
{ DNAFile: HERV-Fc1-AL354685\_1.txt  
{ InputFile:  
{ Debugging: No  
{ FinalSelectionThreshold: 150.0  
{ MakeChainsFiles: 0  
{ BrokenPenalty: 0.9  
{ Database: Ordinary  
{ Strand: Both  
{ SDFactor: 5.5  
{ ORFIDMinScore: 200  
{ KeepThreshold: 25.0  
{ LengthBonus: 1.02  
{ BrokenPasses: 1  
{ ConservationFactor: 2  
{ ScriptPath: C:\Retrotector\RetroTector10\Workplace\HERV-Fc1-AL354685\HERV-Fc1-AL354685\_1\RetroVID\_001Script\_.txt  
{ SubGeneHitsMax: 5  
{ SelectionThreshold: 100.0  
{ FitPuteins: Yes  
{ and plugins  
{ LTRAlign  
{ LTRhistogram  
{ ComplementDNA  
{ LTRImprover  
{ Execution time was 49532 milliseconds  
{ Belongs in C:\Retrotector\RetroTector10\Workplace\HERV-Fc1-AL354685\HERV-Fc1-AL354685\_1  
{ Created "DATE/TIME" under RetroTector version 1.0 "DATE"  
{ using Database:Ordinary last modified "DATE/TIME"

### 3.3.1. Pol Putein

---

Executor: Puteinview  
NumberOfHits: 10  
LeadingInfo::

Leading path in Pol  
Starts at=43634  
Putein string of length=68 and total score=51.805576  
PVPVDPIVWDISTPSIARHHAPIMIKLKDPTkfPSRpQFPISVEHRQGLKPIITRLLQQHILIPVNSR  
yielding average=0.75080544  
Inside limits=1.0  
For fit to alignment 0.44444445\*3.0  
For cleavage site=0.5777778\*0.5  
Yielding path score = 2.3730278  
::  
TrailingInfo::

Trailing path in Pol  
Ends at=46751  
Putein string of length=56 and total score=45.85149  
tPRWSGPYTVILTPRATKLI GLPSWYHISQLKKAPTQhDWSSKLTPTRLRITHGQ  
yielding average=0.8044121  
Inside limits=1.0  
For fit to alignment 0.6111111\*3.0  
Yielding path score = 2.6377454  
::

Gene: Pol  
Genus: c  
DNAFile: HERV-Fc1-AL354685\_1.txt  
EstimatedStartPosition: 43634  
EstimatedLastPosition: 46751  
LengthInside: 1039  
LengthTotal: 1318  
AlignedAcids: 936  
AverageScoreInside: 0.736851  
AverageScoreTotal: 0.58087116  
MostUsedRow: 1 (MuLV\_pol\_U92)  
StopCodonsInside: 1(14, 23, 44)  
StopCodonsTotal: 15  
AmbiguousAcidsInside: 0  
AmbiguousAcidsTotal: 0  
ShiftsInside: 1  
ShiftsTotal: 2  
LongestRun: 568 at 43634  
{ Starts at position 43039, ends at 46995  
LongestORF: 43634

<<pvpvdpivwdistpsiarhhapimiklkdptkfpsrpqfpisvehrqglkpiitrllqqhilipvnsrentpilpirkasgayrlvqldrlineavvpifpvpvn  
pytllsripptthftvldlkddfftiphpdscyflfaftwedpdthvssqfawtvlpqgrdsphlfgqalakdlstctladstllyvddlllcspslsvsqdtatlnf  
lgkqgyrvtpkhvqlctptvtlygislattklttdrvslikdlqldpaddkilsfvglvgffrhwipnfgvlakplyqaaketptpsldpalvarhfhrllqcllta  
pvvslpnlrpfhlytdelqgvatgllgqpvvgptyqvaylsrqlpstrgwqpcrlalaaaeltkealktlshpltvysphrltdvlskclahlapsriqlfhvl  
fvenpdiltaspplnpatllpieaseppvshscpelltsnpnslglfdpplsnpdstlfvdgssvltpcgrrqaayavvthdktveaaalplgttsqkaellalra  
llsqgqrwniytdskyayshcthafcslagarfpyyerdfnrqrasy

Putein::

1 \_\_\_\_\_ 2 \_\_\_\_\_ 3 \_\_\_\_\_  
4 \_\_\_\_\_ 5 \_\_\_\_\_  
6 \_\_\_\_\_ 7 \_\_\_\_\_ 8 \_\_\_\_\_  
9 \_\_\_\_\_ 10 \_\_\_\_\_



```

{ NonAlignedScore: 0.4
{ GlycosylationFactor: 0.2
{ StopCodonFactor: -0.4
{ LastDNAEnd: 46997
{ NonORFHexamerFactor: -0.1
{ MotifHitFactor: 0.2
{ DNAFile: HERV-Fc1-AL354685_1.txt
{ VirusGenus: C
{ StopCodonValue: -15
{ MasterSkipPenalty: -0.2
{ InORFBonus: 0.1
{ OutputFile: ORFIDout_P00001CPol_001.txt
{ InputFile:
{ MinHitScore: 15
{ Debugging: No
{ Strand: Primary
{ Database: Ordinary
{ Gene: Pol
{ PuteinFile: Putein_P00001CPol_001.txt
{ ORFHexamerFactor: 0.2
{ ChainNumber: 00001
{ FirstDNASTart: 43039
{ ScriptPath: C:\Retrovector\RetroTector10\Workplace\HERV-Fc1-AL354685\HERV-Fc1-
AL354685_1\ORFID_P00001CPol_001Script.txt
{ FirstDNAEnd: 46645
{ LastDNASTart: 43737
{ MinAverageScore: 20
{ FrameShiftFactor: -1.5
{ ScoreFactor: 0.1
{ and plugins
{ LTRAlign
{ LTRhistogram
{ ComplementDNA
{ LTRImprover
{ Execution time was 34349 milliseconds
{ Belongs in C:\Retrovector\RetroTector10\Workplace\HERV-Fc1-AL354685\HERV-Fc1-AL354685_1
{ Created "DATE/TIME" under RetroTector version 1.0 "DATE"
{ using Database:Ordinary last modified "DATE/TIME"

```

### 3.4. ORFID-Env

---

Executor: ORFID  
DNAFile: HERV-Fc1-AL354685\_1.txt  
Strand: Primary  
Database: Ordinary  
VirusGenus: C  
Gene: Env  
FirstDNAStart: 45471  
LastDNAStart: 47271  
ChainNumber: 00001  
FirstDNAEnd: 48379  
LastDNAEnd: 49153  
HitInfo::  
48088 62 TM3 P C #IQNhRGLDILTAekGGLCifLE HERV H/ERV9  
48316 13 TM5 HYF ABCDELSGO #X\_\_\_\_\_ hydrophobic motif  
::  
{ Created by RetroVID with parameters  
{ FrameFactor: 1.5  
{ ImproveHitsMax: 5  
{ MaxSubGeneSkip: 4  
{ DNAFile: HERV-Fc1-AL354685\_1.txt  
{ InputFile:  
{ Debugging: No  
{ FinalSelectionThreshold: 150.0  
{ MakeChainsFiles: 0  
{ BrokenPenalty: 0.9  
{ Database: Ordinary  
{ Strand: Both  
{ SDFactor: 5.5  
{ ORFIDMinScore: 200  
{ KeepThreshold: 25.0  
{ LengthBonus: 1.02  
{ BrokenPasses: 1  
{ ConservationFactor: 2  
{ ScriptPath: C:\Retrotector\RetroTector10\Workplace\HERV-Fc1-AL354685\HERV-Fc1-AL354685\_1\RetroVID\_001Script\_.txt  
{ SubGeneHitsMax: 5  
{ SelectionThreshold: 100.0  
{ FitPuteins: Yes  
{ and plugins  
{ LTRAlign  
{ LTRhistogram  
{ ComplementDNA  
{ LTRImprover  
{ Execution time was 49532 milliseconds  
{ Belongs in C:\Retrotector\RetroTector10\Workplace\HERV-Fc1-AL354685\HERV-Fc1-AL354685\_1  
{ Created "DATE/TIME" under RetroTector version 1.0 "DATE"  
{ using Database:Ordinary last modified "DATE/TIME"



### 3.4.1. Env Putein

---

Executor: Puteinview

NumberOfHits: 2

LeadingInfo::

Leading path in Env

Starts at=46764

Putein string of length=441 and total score=433.02655

MLLLLLTLLTPIVPSNSLLTEPPFRWRfYLHETWTQGNRLSTVtLATVDCqPHGCQAQvTfNfTSfKSVLRg  
wSnPTICFvYDqtHSnCRDYwvDTNGGCPYAYCRMHVtqLhtaKKLQhTYrltsDGRtTYFLTIPDPwdSrwVSG  
VTGRIYRWpTdSYVVGKLRIFLTyIRVipQVLSNIKDQAdNIKHqEEVINTLVqSHPKADMVTYDDKAEAGP  
FSWITLVRHGARLVNMAGLVNLSHCFLCtALSqPPIVA VPLPQAFNTSGNHTAHPSgVfSeQvPLFRdPLQP  
qFPFcyTTpNSSwCNQTYSGSLSnLsAPAgGyFWCNfTLtkhlnIssNNTISrNLClpISLVPRLTLYSEaELSSLVN  
PPMRQKRAVFPPLVIGVSLTSSLVASGLGTGaIVHFISsQDLSIkLQmAIEASaeSLaSLQRQITSVAkvA

yielding average=0.97969806

Inside limits=1.0

For fit to alignment 0.6111111\*3.0

Kozak score=0.71875\*0.5

For SpliceAcceptorMotif at 46752 0.5714286\*0.7

von Heijne score with LATVDCqPHGCQAQv =0.25985792\*0.5

Majored:-1.0

Yielding path score = 3.7023354

::

TrailingInfo::

Trailing path in Env

Ends at=48393

Putein string of length=102 and total score=104.23819

MQNRRALDLLTADKGGTCmFLGEECCYYINeSGLVeTSILTLDKIRDgLhRpSSStPNYGGgWWQSPLTTWI  
IPFISPILiICLLLLIAPCVLKFikNRiseV

yielding average=1.0120213

Inside limits=1.0

For fit to alignment 0.6888889\*3.0

Yielding path score = 3.0786877

::

Gene: Env

Genus: c

DNAFile: HERV-Fc1-AL354685\_1.txt

EstimatedStartPosition: 46764

EstimatedLastPosition: 48393

LengthInside: 543

LengthTotal: 1226

AlignedAcids: 453

AverageScoreInside: 0.9125116

AverageScoreTotal: 0.4041548

MostUsedRow: 1 (GaLV\_env)

StopCodonsInside: 0(27, 29, 0)

StopCodonsTotal: 10

AmbiguousAcidsInside: 0

AmbiguousAcidsTotal: 0

ShiftsInside: 1

ShiftsTotal: 1

LongestRun: 541 at 46768

{ Starts at position 45471, ends at 49150

LongestORF: 46768

<<lllllTltpivpsnsllteppfrwrflhetwtqgnrlstvtlatvdcqphgcqaqvtfnfTSfKSVLRgwsnpticfvYDqtHSnCRDYwvDTNGGCPYAYCRMHVtqLhtaKKLQhTYrltsDGRtTYFLTIPDPwdSrwVSGVTGRIYRWpTdSYVVGKLRIFLTyIRVipQVLSNIKDQAdNIKHqEEVINTLVqSHPKADMVTYDDKAEAGPFSWITLVRHGARLVNMAGLVNLSHCFLCtALSqPPIVA VPLPQAFNTSGNHTAHPSgVfSeQvPLFRdPLQPqFPFcyTTpNSSwCNQTYSGSLSnLsAPAgGyFWCNfTLtkhlnIssNNTISrNLClpISLVPRLTLYSEaELSSLVNPPMRQKRAVFPPLVIGVSLTSSLVASGLGTGaIVHFISsQDLSIkLQmAIEASaeSLaSLQRQITSVAkvA

laslqrqitsvakvamqnralltadkqgcmflgeecyyinesglvetslltdkirdglhrpsstpnnyggwwqsplittwiifispiliicllliapcvlkfi  
 knrise>>  
 Putein::

1 \_\_\_\_\_ 2 \_\_\_\_\_

hckshqskdpvaqgnnladstakslaltsapapapamflsgsrtpayspqetfhlisnlkgmtdqdzivwdnrjalpesqaqaaitdvhtlligpklhqfle  
 piflcpqlslihqvhtcavcstvntqgglrrpgphhqlrhqpedwqldfthmprhkhyrylltlvdtftgwieaftaretgevavsvllehiiprfglprsl  
 qsdngpafvskitqqvseslrvtwklhipyrpqssgkveransllkehlktlletklswwtllplaltrlraaprgptglspfellygrpflpglpptvsvpplasylp  
 yltllrldrkhadaclpeptsspdpavvlspgdsvglkelqskltlprwsgpytvltpatrklglpswyhlsqkkaptqhdwsskltprlithgtfptML  
 LLLLTLTPiVPSNSLLTePPFrWRfYLHeTWTQGNRLSTVtLATVDCqPHGCQAQvTfNfTSfKSVLRgwSnPT  
 ICFvYDqtHSnCRDYwvDTNGGCPYAYCRMHVtqLhtaKKLQHtYrItsDGRtTYfLTIPDPwdSrWVSGVTGRI  
 YRWpTdSyPVGKLRIfLYrVipQVLSNIKDQAdNIKHqEEVINTLVqSHPKADmVTYDDKAEGPfswITLV  
 RhGARLVNmAGLVNLSHcFLCtALSqPPIVAVPLPQAfNTSGNhTAHPSgVfSeQvPLFRdPLQPqFPFcyTTPN  
 SSWCNQTYSGSLSnLSAPAgGyFWCNfTLtkhlnIssNNTISrNLCIplISLVPrLTLySEaELSSLvnPPmRQKRAVF  
 pPLVIGvsLTSSLVASGLGTGaIVhFISSsQDLSikLQmAIEASaeSLaSLQRQiTSvAkVAmQNRALDILLAdK  
 GGTCmFLGEECCYYINeSGLVeTSILTLDKIRDgLhRPsStPNYGGgWWqSPLTTWiiPFiSPILiCLLLLIaPcV  
 LKFIKNRiSEVsrtvnmllhpysrlptsedhyddaltqgeaarzlrrpflqyevgmgrsppkmapppgpkmaartpsppppppglvshqifppdg  
 hfmptaaprsrnlsqktetyzaphtlyknpllpqsgatsallvrtseprprplikqvashzlpkfaalligyssqagqzikqnlfnglvakatlvpetqn  
 aplydyvqvhtsvepqfthlygikapilqgczedirsirpsaskwlaqcsayzqvzt

22222222222222222222222222222222222222222222222222222222222222222222222222222222222222222222222  
 22222222222222222222222222222222222222222222222222222222222222222222222222222222222222222222222  
 22222222222222222222222222222222222222222222222222222222222222222222222222222222222222222222222  
 22222222222222222222222222222222222222222222222222222222222222222222222222222222222222222222222  
 22222222222222222222222222222222222222222222222222222222222222222222222222222222222222222222222  
 22222222222222222222222222222222222222222222222222222222222222222222222222222222222222222222222  
 22222222222222222222222222222222222222222222222222222222222222222222222222222222222222222222222  
 33333333333333333333333333333333333333333333333333333333333333333333333333333333333333333333333  
 33333333333333333333333333333333333333333333333333333333333333333333333333333333333333333333333  
 33333333333333333333333333333333333333333333333333333333333333333333333333333333333333333333333  
 33333333333333333333333333333333333333333333333333333333333333333333333333333333333333333333333  
 33333333333333333333333333333333333333333333333333333333333333333333333333333333333333333333333  
 33333333333333333333333333333333333333333333333333333333333333333333333333333333333333333333333  
 33333333333333333333333333333333333333333333333333333333333333333333333333333333333333333333333  
 33333333333333333333333333333333333333333333333333333333333333333333333333333333333333333333333  
 33333333333333333333333333333333333333333333333333333333333333333333333333333333333333333333333  
 33333333333333333333333333333333333333333333333333333333333333333333333333333333333333333333333  
 33333333333333333333333333333333333333333333333333333333333333333333333333333333333333333333333  
 33333333333333333333333333333333333333333333333333333333333333333333333333333333333333333333333  
 33333333333333333333333333333333333333333333333333333333333333333333333333333333333333333333333  
 33333333333333333333333333333333333333333333333333333333333333333333333333333333333333333333333  
 33333333333333333333333333333333333333333333333333333333333333333333333333333333333333333333333  
 33333333333333333333333333333333333333333333333333333333333333333333333333333333333333333333333  
 33333333333333333333333333333333333333333333333333333333333333333333333333333333333333333333333  
 33333333333333333333333333333333333333333333333333333333333333333333333333333333333333333333333

! !  
 >! ! !  
 ! ! ! < ! !  
 45471 45561 45651 45741 45831  
 45921 46011 46101 46191 46281  
 46371 46461 46551 46641 46731  
 46822 46912 47002 47092 47182  
 47272 47362 47452 47542 47632  
 47722 47812 47902 47992 48082  
 48172 48262 48352 48442 48532  
 48622 48712 48802 48892 48982  
 49072

::  
 Hits:  
 1 48088 62 TM3 P C #IQNhRGLDILTAEkGGLCifLE HERV H/ERV9  
 2 48316 13 TM5 HYF ABCDELSSGO #X \_\_\_\_\_ hydrophobic motif

::  
 { Created by ORFID with parameters  
 { NonAlignedScore: 0.4  
 { GlycosylationFactor: 0.2  
 { StopCodonFactor: -0.4  
 { LastDNAEnd: 49153  
 { NonORFHexamerFactor: -0.1  
 { MotifHitFactor: 0.2

```

{ DNAMFile: HERV-Fc1-AL354685_1.txt
{ VirusGenus: C
{ StopCodonValue: -15
{ MasterSkipPenalty: -0.2
{ InORFBonus: 0.1
{ OutputFile: ORFIDout_P00001CEnv_001.txt
{ InputFile:
{ MinHitScore: 15
{ Debugging: No
{ Strand: Primary
{ Database: Ordinary
{ Gene: Env
{ PuteinFile: Putein_P00001CEnv_001.txt
{ ORFHexamerFactor: 0.2
{ ChainNumber: 00001
{ FirstDNAStart: 45471
{ ScriptPath: C:\Retrotector\RetroTector10\Workplace\HERV-Fc1-AL354685\HERV-Fc1-
AL354685_1\ORFID_P00001CEnv_001Script.txt
{ FirstDNAEnd: 48379
{ LastDNAStart: 47271
{ MinAverageScore: 20
{ FrameShiftFactor: -1.5
{ ScoreFactor: 0.1
{ and plugins
{ LTRAlign
{ LTRhistogram
{ ComplementDNA
{ LTRImprover
{ Execution time was 32827 milliseconds
{ Belongs in C:\Retrotector\RetroTector10\Workplace\HERV-Fc1-AL354685\HERV-Fc1-AL354685_1
{ Created "DATE/TIME" under RetroTector version 1.0 "DATE"
{ using Database:Ordinary last modified "DATE/TIME"

```

## 4. XonID

---

Executor: XonID  
DNAFile: HERV-Fc1-AL354685\_1.txt  
Strand: Primary  
Database: Ordinary  
ChainNumber: 1  
ChainStart: 41098  
ChainEnd: 48819  
{ Created by RetroVID with parameters  
{ FrameFactor: 1.5  
{ ImproveHitsMax: 5  
{ MaxSubGeneSkip: 4  
{ DNAFile: HERV-Fc1-AL354685\_1.txt  
{ InputFile:  
{ Debugging: No  
{ FinalSelectionThreshold: 150.0  
{ MakeChainsFiles: 0  
{ BrokenPenalty: 0.9  
{ Database: Ordinary  
{ Strand: Both  
{ SDFactor: 5.5  
{ ORFIDMinScore: 200  
{ KeepThreshold: 25.0  
{ LengthBonus: 1.02  
{ BrokenPasses: 1  
{ ConservationFactor: 2  
{ ScriptPath: C:\Retrotector\RetroTector10\Workplace\HERV-Fc1-AL354685\HERV-Fc1-AL354685\_1\RetroVID\_001Script\_.txt  
{ SubGeneHitsMax: 5  
{ SelectionThreshold: 100.0  
{ FitPuteins: Yes  
{ and plugins  
{ LTRAlign  
{ LTRhistogram  
{ ComplementDNA  
{ LTRImprover  
{ Belongs in C:\Retrotector\RetroTector10\Workplace\HERV-Fc1-AL354685\HERV-Fc1-AL354685\_1  
{ Created "DATE/TIME" under RetroTector version 1.0 "DATE"  
{ using Database:Ordinary last modified "DATE/TIME"

## 5. Chainview

---

Executor: Chainview

DNAFile: HERV-Fc1-AL354685\_1.txt

Selected: Yes

Database: Ordinary

PSingleLTRs::

::

SSingleLTRs::

68952 (70136-68338)

AGTAAA(68952);U5NN:0.35(68758);GT:0.95;U3NN:0.9(69820);TATAA:0.84(68997);MEME50:0.56(69895);Mot1:0.36(69212);Mot2:0.37(68966);Trans:0.31;CpG:0.18;Spl8:0.5;\_catgctg/tg<>ca/catgctg

65648 (66266-64804)

ATTAAA(65648);U5NN:0.31(65544);GT:0.67;U3NN:0.9(66098);TATAA:1.0(65847);MEME50:0.56(64938);Mot1:0.45(66003);Mot2:0.39(65679);Trans:0.21;CpG:0.14;Spl8:0.55;\_caaataaa/tg<>ca/caaataaa

::

ChainP1::

A:0.35

B:0.35

C:0.99

D:0.69

E:0.35

L:0.1

S:0.4

G:0.06

O:0.06

41098

48819

Type C Score= 1568

SubGene 5LTR, type CS, score=91 , hotspot 41171

5LT:ABCDELSSGO (5'LTR): Score=91 at 41171 frame 1 [41098-41252]

X scored against

tgactgcagccccgagaagtgcgaaacctatcccagaaaaccgaaacttactaagcccctccccgcgtgctctataaaaaacctctactgccccagtcgggcccgcgac  
ttccctggcctcctgttaggaccagtgaaacctgcccagagctcca (155 bases)

SubGene PBS, type C, score=107 , hotspot 41340

PBS:C (tRNAPhe-HERV.F): Score=107 at 41340 frame 2 [41340-41357]

TGGtgccgaaaccggaa scored against

tggtgccaaaaccggga (18 bases)

SubGene MA, type CD, score=165 , hotspot 41582

MA2:D (HTLV, end of MA): Score=20 at 42059 frame 1 [42059-42088]

iPPPYvepta scored against

lpppygssg (30 bases)

MA3:ABCDELSSGO (Exp Wills acid motif): Score=100 at 42062 frame 1 [41972-42073]

K(1-5)K(10-25)!PPPY scored against

kaspsnkepdssplseppealalplpaalpppy (102 bases)

SubGene CA, type C, score=78 , hotspot 42641

CA0:ABCDELSSGO (CA Start NN): Score=14 at 42029 frame 1 [42029-42118]

CAStartNNData.txt scored against

alalplpaalpppygssgpttaplpp (90 bases)

CA1:C (S71): Score=44 at 42641 frame 1 [42641-42706]

teVVQGPGEYPGaFLECLqEAY scored against

reiiqgsdenpavflnclteal (66 bases)

SubGene NC, type D, score=144 , hotspot 43025

NC1:D (BLV): Score=54 at 43025 frame 1 [43025-43066]

CyrClkeGHwarDC scored against

cfkcgneghwazqc (42 bases)

NC2:D (HTLV-I): Score=42 at 43094 frame 1 [43094-43135]

CplCqdptHwkrDC scored against  
 cpnchqmgkhwksec (42 bases)  
 SubGene Prot, type C, score=94 , hotspot 43310  
 PR2:C (MuLV, motif A): Score=22 at 43310 frame 1 [43310-43339]  
 lvDTGAqhSv scored against  
 lvhmgatysv (30 bases)  
 PR3:C (MuLV, motif B): Score=40 at 43502 frame 1 [43502-43525]  
 llGRdllt scored against  
 lfgrdlls (24 bases)  
 SubGene RT, type C, score=371 , hotspot 44099  
 RT1:C (MLV): Score=32 at 43838 frame 1 [43838-43867]  
 wNtPllpVKK scored against  
 cntpilpirk (30 bases)  
 RT2:C (HERV-H): Score=67 at 43994 frame 1 [43994-44035]  
 sviHLkDaFFtiPL scored against  
 tvldlkddfftipl (42 bases)  
 RT3:C (MLV): Score=66 at 44099 frame 1 [44099-44143]  
 qltWtrLPQGfknSP scored against  
 qfawtvlpqgfrdsp (45 bases)  
 RT4:C (MLV): Score=60 at 44207 frame 1 [44207-44236]  
 lqYvDDLlla scored against  
 llyvddlllc (30 bases)  
 RT5:C (MLV): Score=22 at 44300 frame 1 [44300-44329]  
 GyrasakKaQ scored against  
 gyrvtphkvq (30 bases)  
 SubGene IN, type C, score=335 , hotspot 45930  
 IN3:C (BAEV): Score=18 at 45831 frame 2 [45831-45875]  
 vtsaCkvCqvnaga scored against  
 vhtcavcstvntqg (45 bases)  
 IN4:C (MuLV, motif C): Score=26 at 45930 frame 2 [45930-45953]  
 hWeidfte scored against  
 dwqldfth (24 bases)  
 IN5:C (BAEV): Score=63 at 46110 frame 2 [46110-46145]  
 gSDNGPafvSQv scored against  
 qsdngpafvski (36 bases)  
 IN6:C (HERV-E): Score=60 at 46194 frame 2 [46194-46241]  
 AYqPQSsgKVERmnrt scored against  
 pyrpqssgkveransl (48 bases)  
 IN7:C (BAEV): Score=57 at 46584 frame 2 [46584-46631]  
 eprWkGPyiVLtpt scored against  
 tprwsgpytvltp (48 bases)  
 SubGene TM, type C, score=103 , hotspot 48082  
 TM3:C (HERV H/ERV9): Score=62 at 48088 frame 3 [48088-48153]  
 IQNhRGLDILTAekGGLCifLE scored against  
 mqnralltadkggtcmflg (66 bases)  
 TM5:ABCDELSGO (hydrophobic motif): Score=13 at 48316 frame 3 [48316-48351]  
 X scored against  
 pilliclllia (36 bases)  
 SubGene 3LTR, type CS, score=91 , hotspot 48738  
 3LT:ABCDELSGO (3'LTR): Score=91 at 48738 frame 2 [48665-48819]  
 X scored against

tgacagcagccccgagaagtcgaaacctatcccagaaaaccgaaacttactaagcccctccccacacgctctataaaaacctctactgccccagtcgggtgcga  
 cttccctgcccctctgttaggaccagtgaacctgccccgagagctcca (155 bases)

Integration sites ttcaga/tg<>ca/ttaata

::

P1\_5LTR::

ScoreFactor: 0.148

VirusGenus: CS  
 First: 41098  
 Last: 41252  
 Hotspot: 0.5 1.0 41171 tataaa  
 U5NN: 0.44 2.0 41177  
 GTModifier: 0.24 1.0  
 U3NN: 0.9 1.0 41115  
 TATAA: 1.0 1.0 41169  
 MEME50: 0.55 1.0 41144  
 Motifs1: 1.17 4.0 41122  
 Motifs2: 1.05 4.0 41204  
 Transsites: 0.24 1.0  
 CpGModifier: 0.74 1.0  
 Spl8Modifier: 0.25 1.0  
 ShortDescription:  
 tataaa(41171);U5NN:0.22(41177);GT:0.24;U3NN:0.9(41115);TATAA:1.0(41169);MEME50:0.55(41144);Mot1  
 :0.29(41122);Mot2:0.26(41204);Trans:0.24;CpG:0.74;Spl8:0.25;  
 ::  
 P1\_3LTR::  
 ScoreFactor: 0.156  
 VirusGenus: CS  
 First: 48665  
 Last: 48819  
 Hotspot: 0.5 1.0 48738 tataaa  
 U5NN: 0.43 2.0 48812  
 GTModifier: 0.33 1.0  
 U3NN: 0.88 1.0 48665  
 TATAA: 1.0 1.0 48736  
 MEME50: 0.58 1.0 48711  
 Motifs1: 1.17 4.0 48689  
 Motifs2: 1.05 4.0 48771  
 Transsites: 0.47 1.0  
 CpGModifier: 0.83 1.0  
 Spl8Modifier: 0.29 1.0  
 ShortDescription:  
 tataaa(48738);U5NN:0.21(48812);GT:0.33;U3NN:0.88(48665);TATAA:1.0(48736);MEME50:0.58(48711);Mot  
 1:0.29(48689);Mot2:0.26(48771);Trans:0.47;CpG:0.83;Spl8:0.29;  
 ::  
 P1SlipperyMotifHits::  
 41835 41841 100  
 42797 42803 100  
 43727 43733 100  
 46960 46966 100  
 ::  
 P1PseudoKnotMotifHits::  
 ::  
 P1SpliceAcceptorMotifHits::  
 41175 41193 18  
 41207 41225 39  
 41361 41379 18  
 41394 41412 59  
 41458 41476 80  
 41512 41530 18  
 42036 42054 18  
 42060 42078 80  
 42402 42420 39  
 42726 42744 39  
 43195 43213 18  
 43345 43363 18  
 43403 43421 39

43552 43570 59  
43585 43603 18  
43743 43761 18  
43923 43941 80  
44141 44159 39  
44221 44239 59  
44243 44261 59  
44274 44292 18  
44417 44435 18  
44445 44463 39  
44556 44574 18  
44582 44600 18  
44649 44667 59  
44732 44750 18  
44824 44842 18  
44838 44856 18  
44862 44880 18  
44905 44923 18  
44997 45015 59  
45106 45124 18  
45151 45169 39  
45256 45274 39  
45275 45293 59  
45281 45299 18  
45351 45369 39  
45429 45447 18  
45556 45574 59  
45606 45624 59  
45699 45717 18  
45769 45787 18  
45798 45816 18  
45813 45831 18  
45979 45997 59  
46054 46072 18  
46525 46543 39  
46784 46802 59  
47159 47177 18  
47231 47249 18  
47499 47517 39  
47533 47551 18  
47617 47635 18  
47623 47641 18  
47708 47726 18  
47826 47844 18  
47998 48016 18  
48040 48058 59  
48104 48122 39  
48332 48350 59  
48505 48523 80  
48742 48760 18  
48774 48792 39

::

P1SpliceDonorMotifHits::

41449 41457 33  
41595 41603 33  
41871 41879 33  
42905 42913 33  
43290 43298 100  
43872 43880 33  
44010 44018 33



```

44439 44447 33
45142 45150 33
45535 45543 33
45922 45930 33
46033 46041 33
46540 46548 33
46936 46944 33
47199 47207 33
47723 47731 33
48384 48392 33
48492 48500 33
::
{ Execution time was 49491 milliseconds
{ Created by RetroVID with parameters
{ FrameFactor: 1.5
{ ImproveHitsMax: 5
{ MaxSubGeneSkip: 4
{ DNAFile: HERV-Fc1-AL354685_1.txt
{ InputFile:
{ Debugging: No
{ FinalSelectionThreshold: 150.0
{ MakeChainsFiles: 0
{ BrokenPenalty: 0.9
{ Database: Ordinary
{ Strand: Both
{ SDFactor: 5.5
{ ORFIDMinScore: 200
{ KeepThreshold: 25.0
{ LengthBonus: 1.02
{ BrokenPasses: 1
{ ConservationFactor: 2
{ ScriptPath: C:\Retrotector\RetroTector10\Workplace\HERV-Fc1-AL354685\HERV-Fc1-
AL354685_1\RetroVID_001Script_.txt
{ SubGeneHitsMax: 5
{ SelectionThreshold: 100.0
{ FitPuteins: Yes
{ and plugins
{ LTRAlign
{ LTRhistogram
{ ComplementDNA
{ LTRImprover
{ Belongs in C:\Retrotector\RetroTector10\Workplace\HERV-Fc1-AL354685\HERV-Fc1-AL354685_1
{ Created "DATE/TIME" under RetroTector version 1.0 "DATE"
{ using Database:Ordinary last modified "DATE/TIME"

```

## Delineation of the four major retroviral genes in reference genomes.

| Genus   | Virus                                                               | RT_gag | Annot_gag | RT_pro | Annot_pro | RT_pol | Annot_pol | RT_env             | Annot_env |
|---------|---------------------------------------------------------------------|--------|-----------|--------|-----------|--------|-----------|--------------------|-----------|
| Lenti   | HIV1HXB2<br>NC_001802_RNA                                           | 336    | 336       | 1799   | ?         | 2096   | 2096      | 5641               | 5771      |
|         |                                                                     | -      | -         | -      | -         | -      | -         | -                  | -         |
|         |                                                                     | 1835   | 1838      | 2092   |           | 4639   | 4639      | 8338               | 8341      |
| Delta   | HTLV1<br>NC_001436_RNA                                              | 780    | 450       | 1739   | 1718      | 2245   | 2245      | 4829               | 4829      |
|         |                                                                     | -      | -         | -      | -         | -      | -         | -                  | -         |
|         |                                                                     | 1736   | 1739      | 2344   | 2245      | 4833   | 4836      | 6292               | 6295      |
|         | HTLV2<br>NC_001488                                                  | 807    | 807       | 2108   | ?         | 2593   | 2239      | 5180               | 5180      |
|         |                                                                     | -      | -         | -      | -         | -      | -         | -                  | -         |
|         |                                                                     | 2105   | 2108      | 2611   |           | 5184   | 5187      | 6640               | 6640      |
| Alpha   | ALV<br>NC_001408 RNA                                                | 372    | 372       | 2094   | 2103      | 2477   | 2495      | No env!            | 5069      |
|         |                                                                     | -      | -         | -      | -         | -      | -         | -                  | -         |
|         |                                                                     | 2093   | 2102      | 2474   | 2474      | 5197   | 5182      |                    | 6872      |
|         | RSV<br>NC_001407 RNA                                                | 380    | 380       | 2103   | ?         | 2485   | 2482      | No env!            | 5078      |
|         |                                                                     | -      | -         | -      | -         | -      | -         | -                  | -         |
|         |                                                                     | 2101   | 2485?     | 2482   |           | 7187   | 5190      |                    | 9392      |
| Gamma   | MoMLV<br>NC_001501 RNA                                              | 357    | 357       | 1974   | 1959      | 2292   | 2337?     | 5513               | 5513      |
|         |                                                                     | -      | -         | -      | (1974)    | -      | -         | -                  | -         |
|         |                                                                     | 1970   | 1973      | 2291   |           | 5570   | 5573      | 7507               | 7510      |
|         | FeLV<br>NC_001940                                                   | 907    | 907       | 2428   | 2413      | 2746   | 2788      | 5988               | 5988      |
|         |                                                                     | -      | -         | -      | -         | -      | -         | -                  | -         |
|         |                                                                     | 2424   | 2412      | 2745   | 2787      | 6042   | 6042      | 7853               | 7916      |
|         | Woolly monkey<br>sarcoma virus (w/o sis<br>oncogene)<br>NC_1514 RNA | 1614   | 645       | 2690   | 3368      | 3636   | 3888      | 6366               | 6314      |
|         |                                                                     | -      | -         | -      | -         | -      | -         | -                  | -         |
|         |                                                                     | 2864   | 2867      | 3637   | 3640      | 6281   | 6284      | 8345               | 8041      |
| Beta    | JSRV<br>NC_001494 RNA                                               | 263    | 263       | 1984   | 1993      | 2856   | 3108      | 5350               | 5350      |
|         |                                                                     | -      | -         | -      | -         | -      | -         | -                  | -         |
|         |                                                                     | 2098   | 2101      | 2859   | 2862      | 5438   | 5441      | 7194               | 7197      |
|         | MPMV<br>NC_001550 RNA                                               | 269    | 269       | 2116   | 1844      | 3003   | 2092      | 5671               | 5621      |
|         |                                                                     | -      | -         | -      | -         | -      | -         | -                  | -         |
|         |                                                                     | 2239   | 2242      | 3006   | 2865      | 5579   | 5579      | 7748               | 7378      |
| Epsilon | SnakeheadRV<br>NC_001724_RNA                                        | 640    | 337       | 2149   | 2194      | 2749   | 2194      | 6131               | 6184      |
|         |                                                                     | -      | -         | -      | -         | -      | -         | -                  | -         |
|         |                                                                     | 2140   | 2193      | 2748   | ?         | 6387   | 6390      | 9532               | 9535      |
|         | WDSV<br>NC_001867 RNA                                               | 800    | 800       | 2549   | 2545-     | 2924   | ?         | 6115               | 5856      |
|         |                                                                     | -      | -         | -      | ?         | -      | -         | -                  | -         |
|         |                                                                     | 2545   | 2548      | 2923   |           | 6055   | 6058      | 8454<br>(EnvTrace) | 12708     |
|         | Xen1<br>AJ506107                                                    | 2088   | 2088      | 3846   | 3846      | 4347   | ?         | 8103               | 7498      |
|         |                                                                     | -      | -         | -      | -         | -      | -         | -                  | -         |
|         |                                                                     | 3842   | 3845      | 4346   | ?         | 7498   | 7051      | 9610               | 9494      |

Comment to the table:

RT predicts the four major structural protein genes with precision in the simple retroviruses. The complex viruses (lenti, delta and epsilon retroviruses), which have one or several additional regulatory protein genes, can cause problems. The genes most often affected are the *gag* and *env*. Additional reading frames are occasionally present before *gag* and around *env*. Similar problems are caused by the sarcoma viruses, where oncogenes disrupt the retroviral structure.











## Detailed comparison of ReTe with RepeatMasker (hg15)

This is given in the contingency table, which lists hg15 findings (S7). To enable a qualitative comparison with the other approaches to retroviral sequence detection, ReTe chains were categorised into 31 groups (erv3like, erv9like, herv19like, herv48like, hervadplike, hervelike, hervfblike, hervfclike, hervfrdlike, hervhlike, hervlike, hervl66like, hervllike, hervrblike, hervslike, hervtlike, hervwlike, hml1-10, huersp3like, mer41like, mer66like and rhervlike). They are based on around 80% similarity of their Pol protein to the same number of reference HERV Pol proteins. HERV classification is the subject of a forthcoming paper (Blomberg et al, in preparation), in which 62% of ReTe chains in hg15 were classified in this manner. Repeatmasker entries are often fragments of longer transposon segments. Recognition of a sequence as “retroviral” is often difficult. Many ReTe chains are classified into similar groups as Repeatmasker entries, among them 176 erv9like/HERV9, 776 hervhlike/HERVH and 113 hervllike/HERVLA1 ReTe/Repeatmasker coincidences. The very old and mutated, remotely retroviruslike, MalR elements, 4% of the human genome [IHGSC, 2001], are entirely missed by ReTe. Neither are single LTRs (approximated by RepeatMasker to 0.7 % of the human genome) efficiently detected by ReTe.

In a more recent comparison of ReTe and RM (table S10), a small number of RM missed elements were identified in galGal3, canFam2 and hg18. galGal3 had the highest proportion of RM misses (84). Notable among them were 7 betaretroviruslike and one gammaretroviruslike chains with a ReTe score >400. In canFam2, 24 ReTe chains were missed by RM. They contained 3 betaretroviruslike and one errantiviruslike chain with a ReTe score above 400. The few RM-missed elements in hg18 (28) were mainly weakly ReTe-scoring with a limited similarity to *Errantivirus*. Repeatmasker output for the three genomes has become more complete from early versions (hg15, gagGal1 and canFam1)(our observations). The reasons for the few remaining RM-missed elements, and their properties, should be further investigated.

## Detailed Comparison of ReTe with HERVd (hg15)

This is given in the contingency table (S8), also based on hg15. The nomenclature is highly concordant for some ReTe groups versus a HERVd family: erv9like/HERV9, herv19like/HERVH1, hervhlike/HERVH, hml2/HERVK, hml5/HERVK22, hml6/HERVK3, hervwlike/HERV17, hervtlike/HERVS71, huersp3like /HUERSP3, hervllike/HERVL were unambiguous ReTe/HERVd coincidences. In other cases assignments crosses between ReTe groups and HERVd families, like for hervelike and erv3like ReTe groups, where variously HERV3 or HERVE HERVd families were involved. Some HERVd families have no or just a few ReTe chain counterparts: 15 ervllike are recorded by ReTe vs 5256 in HERVd (in the following written as 15/5256), herv16like 4/ 2049, HERVL 297/2462, LOR1a 0/1024 and LOR1B 1/1443. The “Other” group (29 125 elements or element pieces) in HERVd contains 19 mer41like, 24 huersp3like and 50 erv9like ReTe chains.

## ROC curves and sensitivity plots (hg18, canFam2 and galGal3)

To provide an updated comparison, the hg18 (March 2006) assembly was used. HERVd does not cover this version. Instead, we constructed likely elements from RepeatMasker output for hg18 (downloaded in April, 2007). As described below, overlapping elements, and elements with a proximity of <500 bp to elements of the same group and polarity, were connected to



form “RM chains”. These are the basis for the plots for the human, dog and chicken genomes, in supplementary material S11-S16.

There are a number of difficulties with the comparison of ReTe and RepeatMasker (RM):

1. It must be stressed that the RepeatMasker output is difficult to organise into proviruses. The “id” number is given, on unclear grounds, for a collection of like and probably connected repeats. However, this property only covers a minority of likely connected repeat fragments. Instead, we (JB) had to write a program which provisionally joins RM repeats into proviral chains.
2. A minority of allelic chromosome names are erratic, like “qbl.hap1”. It is easy to miss some overlaps due to possible minor chromosome name differences in RM and ReTe. However, this error was compensated for, if detected. It can only account for a few missed ReTe-RM chain overlaps.
3. A basic problem is secondary integration of proviruses into each other. This may create two incomplete halves and one complete provirus. RM lists all repeats, but may fail to knit them together. ReTe may or may not knit the outer halves together due to its broken chain function, possibly discarding the inner element. Old elements often have multiple secondary integrations. They may distort the proviral structure beyond ReTe recognition. It is a likely cause of ReTe misses in many of the old elements (MalR, ERVL, many of the MER elements), despite the ability of ReTe to detect highly mutated proviruses (this paper). In addition, the MalR and ERVL elements may have structural deviations from the current ReTe structural model. Coming versions of ReTe will aim at alleviating this restriction.
4. ReTe rarely detects chains less than 1000 bp long. Usually, they are more than 2000 bp long, whereas RM can detect much shorter repeats, and single LTRs.

Thus, the comparison can only be approximate.

In the data behind table S10, and figures S11-S16, ReTe sensitivity was calculated versus a more or less reduced set of RM hits.

5. For calculation of specificity, the abstract RM negative/ReTe negative value must be estimated. If it is a large number, its exact size will not affect calculations much. It was arbitrarily set to genome size / 10 000.

**Enumeration of ReTe chains with a score of  $\geq 300$ , and approximated RM connected elements in three genomes.**

| <b>Genome</b>                | <b>ReTe+RM+</b> | <b>ReTe+RM-</b> | <b>ReTe-RM+</b> | <b>Sens%</b> | <b>Spec%</b> |
|------------------------------|-----------------|-----------------|-----------------|--------------|--------------|
| <b>galGal3<br/>large set</b> | <b>417</b>      | <b>82</b>       | <b>306</b>      | <b>57.7</b>  | <b>99.97</b> |
| <b>galGal3<br/>small set</b> | <b>404</b>      | <b>82</b>       | <b>15</b>       | <b>96.4</b>  | <b>99.97</b> |
| <b>canFam2<br/>large set</b> | <b>377</b>      | <b>33</b>       | <b>3200</b>     | <b>10.5</b>  | <b>99.97</b> |
| <b>canFam2<br/>small set</b> | <b>376</b>      | <b>23</b>       | <b>35</b>       | <b>91.5</b>  | <b>99.99</b> |
| <b>hg18<br/>large set</b>    | <b>3511</b>     | <b>33</b>       | <b>11453</b>    | <b>23.5</b>  | <b>99.99</b> |
| <b>hg18<br/>small set</b>    | <b>3389</b>     | <b>28</b>       | <b>2130</b>     | <b>61.4</b>  | <b>99.98</b> |

ReTe chains were tested for coincidence with RM elements connected via “id” assignment, overlap, or proximity less than 500 bp. The RM elements considered were of LTR type. Each genome was studied in two ways:

The “large set” disregarded MalR and ERVL elements, single LTRs insofar as they could be identified programmatically, and elements shorter than 1000 bp.

The “small set” disregarded a larger number of elements. MalR and ERVL elements, single LTRs, MER and some other elements (see below), and elements shorter than 2000 bp were excluded. Many of the MER elements are common to the human and dog genomes, some also occur in the chicken genome. MER elements were encountered in some previous analyses by us and others [Jern, 2005; Jern et al., 2005; Jern et al., 2005; Jurka et al., 2005; Oja et al., 2005]. Most of them are evolutionarily old elements with multiple secondary integrations which disrupt proviral structure. As seen from the table, the removal of these elements resulted in significantly higher sensitivity values for ReTe. Despite drastic removal of LTR elements in the small set, very few ReTe+ elements were removed.

The following elements were disregarded in the “small set”:

LOR1; PABL; MER41, 66, 84, 51, 83, 50, 4, 65, 61, 57, 92, 52, 90, 34, 31, 67, 110, 89, 21, 39, 49, 101, 70, 72, 87, 90, 92, 93, 95; CARLTR1, 2, 4, 5, 6, 7, 8; CARERV4, 2; GGLTR1, LTR34, 75, 48, 28, 23, 24, 8, 49, 27, 37, 48, 54, 12, 26, 2, 35, 38, 44, 45, 61, 64, 6, 77, 7; HUERS-P2; HUERS-P3"

- IHGSC. 2001 Feb 15. Initial sequencing and analysis of the human genome. *Nature*:860-921.
- Jern P. 2005. Genomic Variation and Evolution of HERV-H and other Endogenous Retroviruses (ERVs). Uppsala: Thesis, Acta Universitatis Upsaliensis. 77 p.
- Jern P, Sperber GO, Ahlsen G, Blomberg J. 2005. Sequence variability, gene structure, and expression of full-length human endogenous retrovirus h. *J Virol* 79(10):6325-6337.
- Jern P, Sperber GO, Blomberg J. 2005. Use of endogenous retroviral sequences (ERVs) and structural markers for retroviral phylogenetic inference and taxonomy. *Retrovirology* 2:50.
- Jurka J, Kapitonov VV, Pavlicek A, Klonowski P, Kohany O, Walichiewicz J. 2005. Repbase Update, a database of eukaryotic repetitive elements. *Cytogenet Genome Res* 110(1-4):462-467.
- Oja M, Sperber GO, Blomberg J, Kaski S. 2005. Self-organizing map-based discovery and visualization of human endogenous retroviral sequence groups. *Int J Neural Syst* 15(3):163-179.

**A**

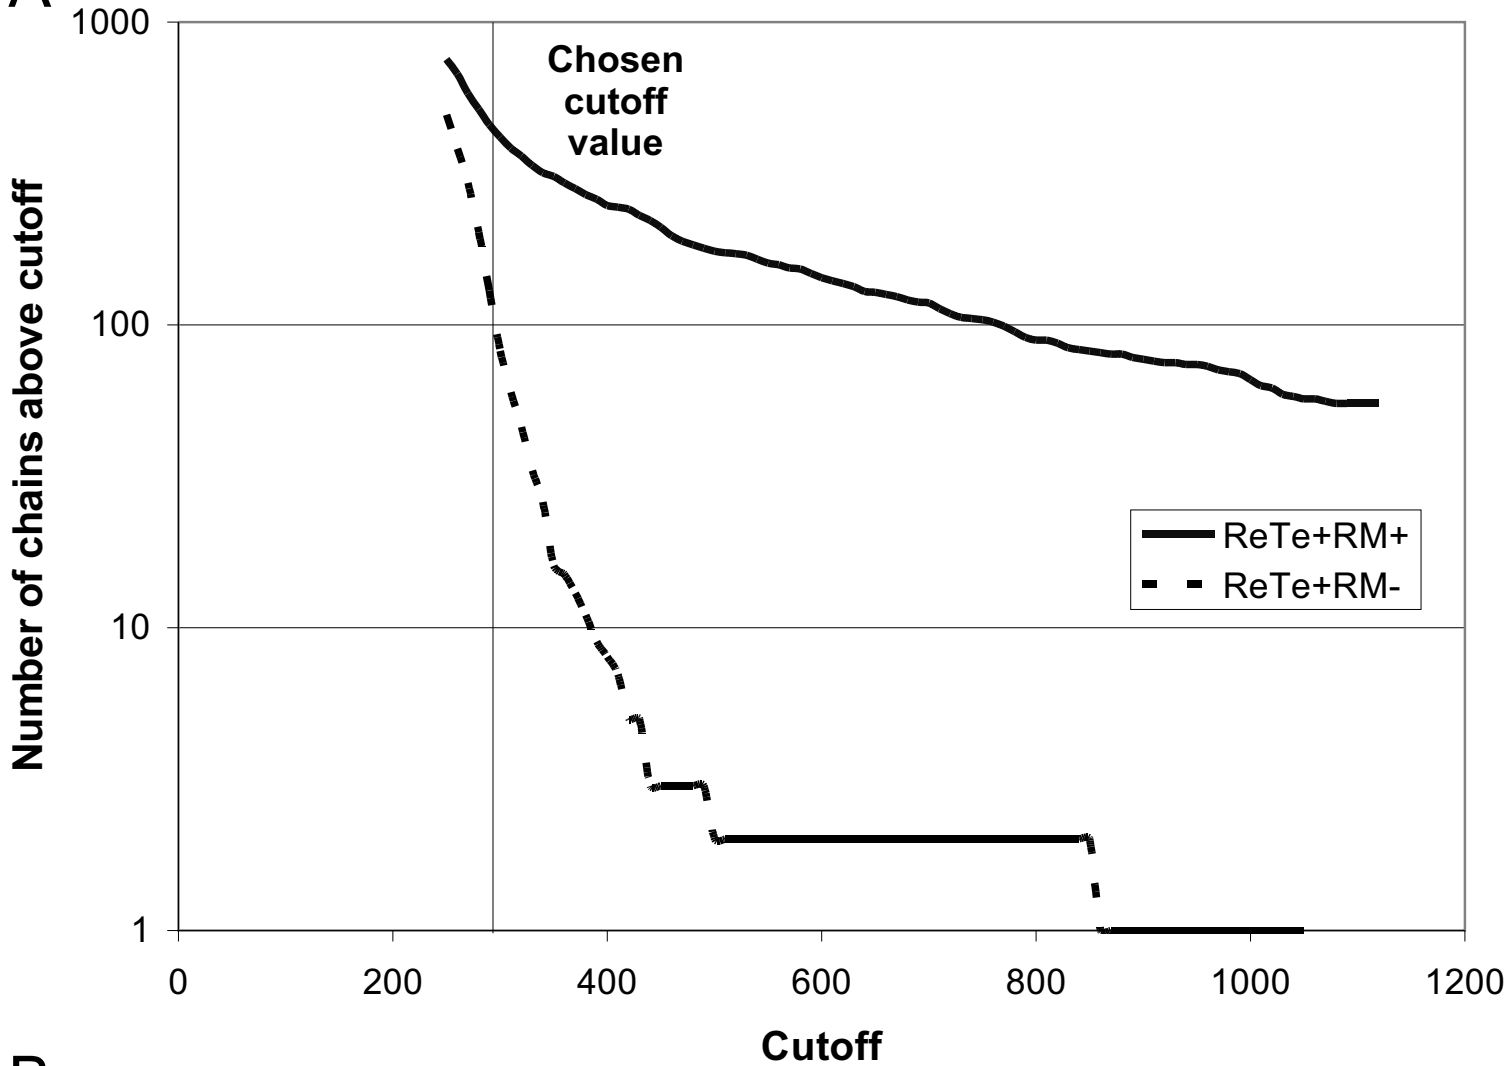

**B**

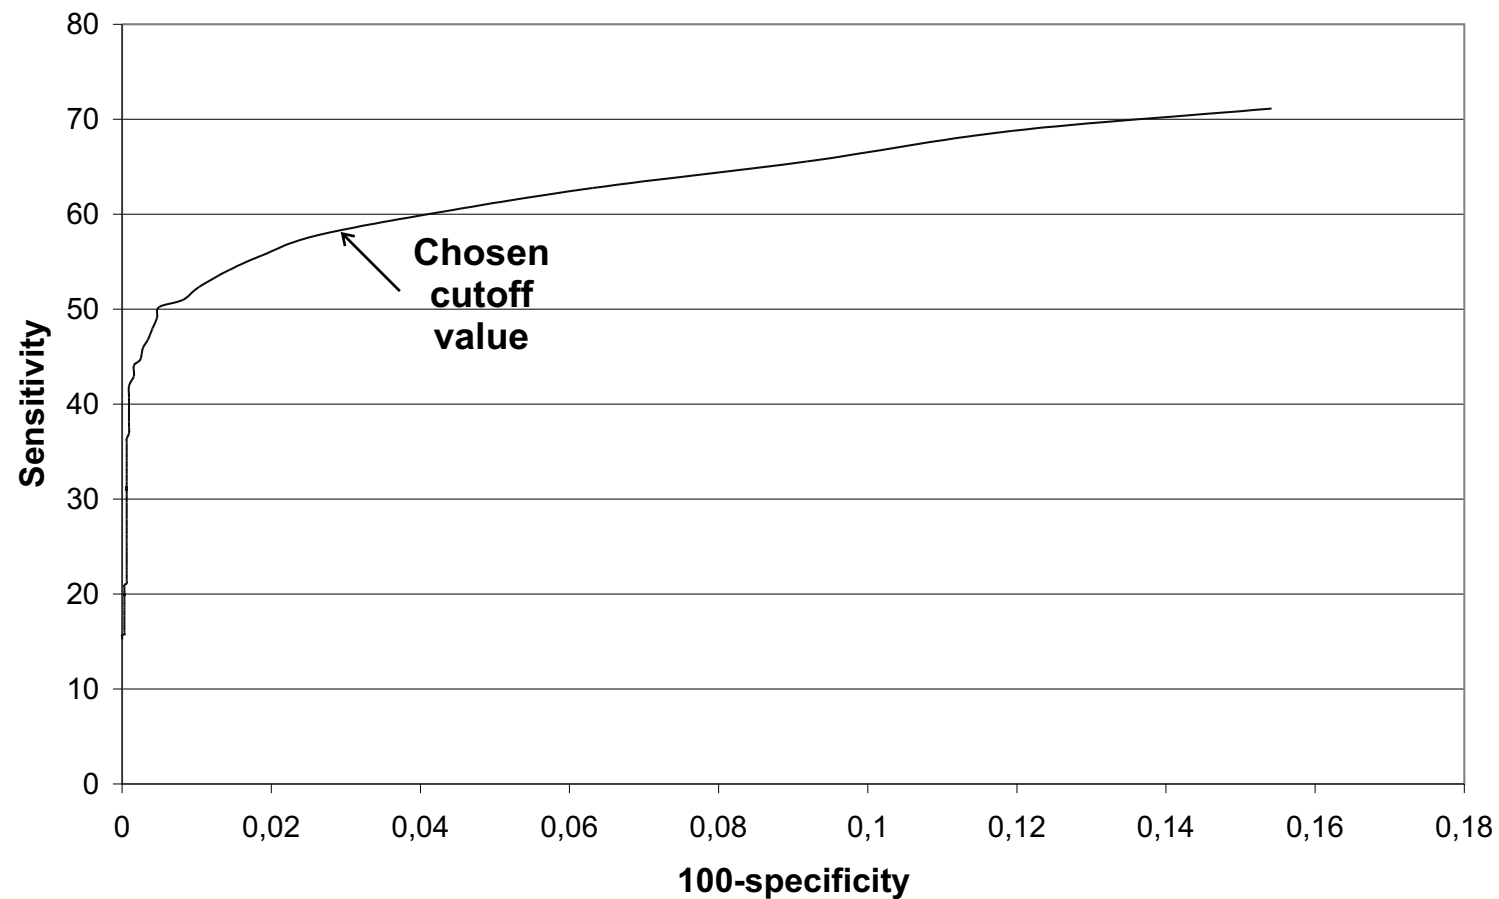

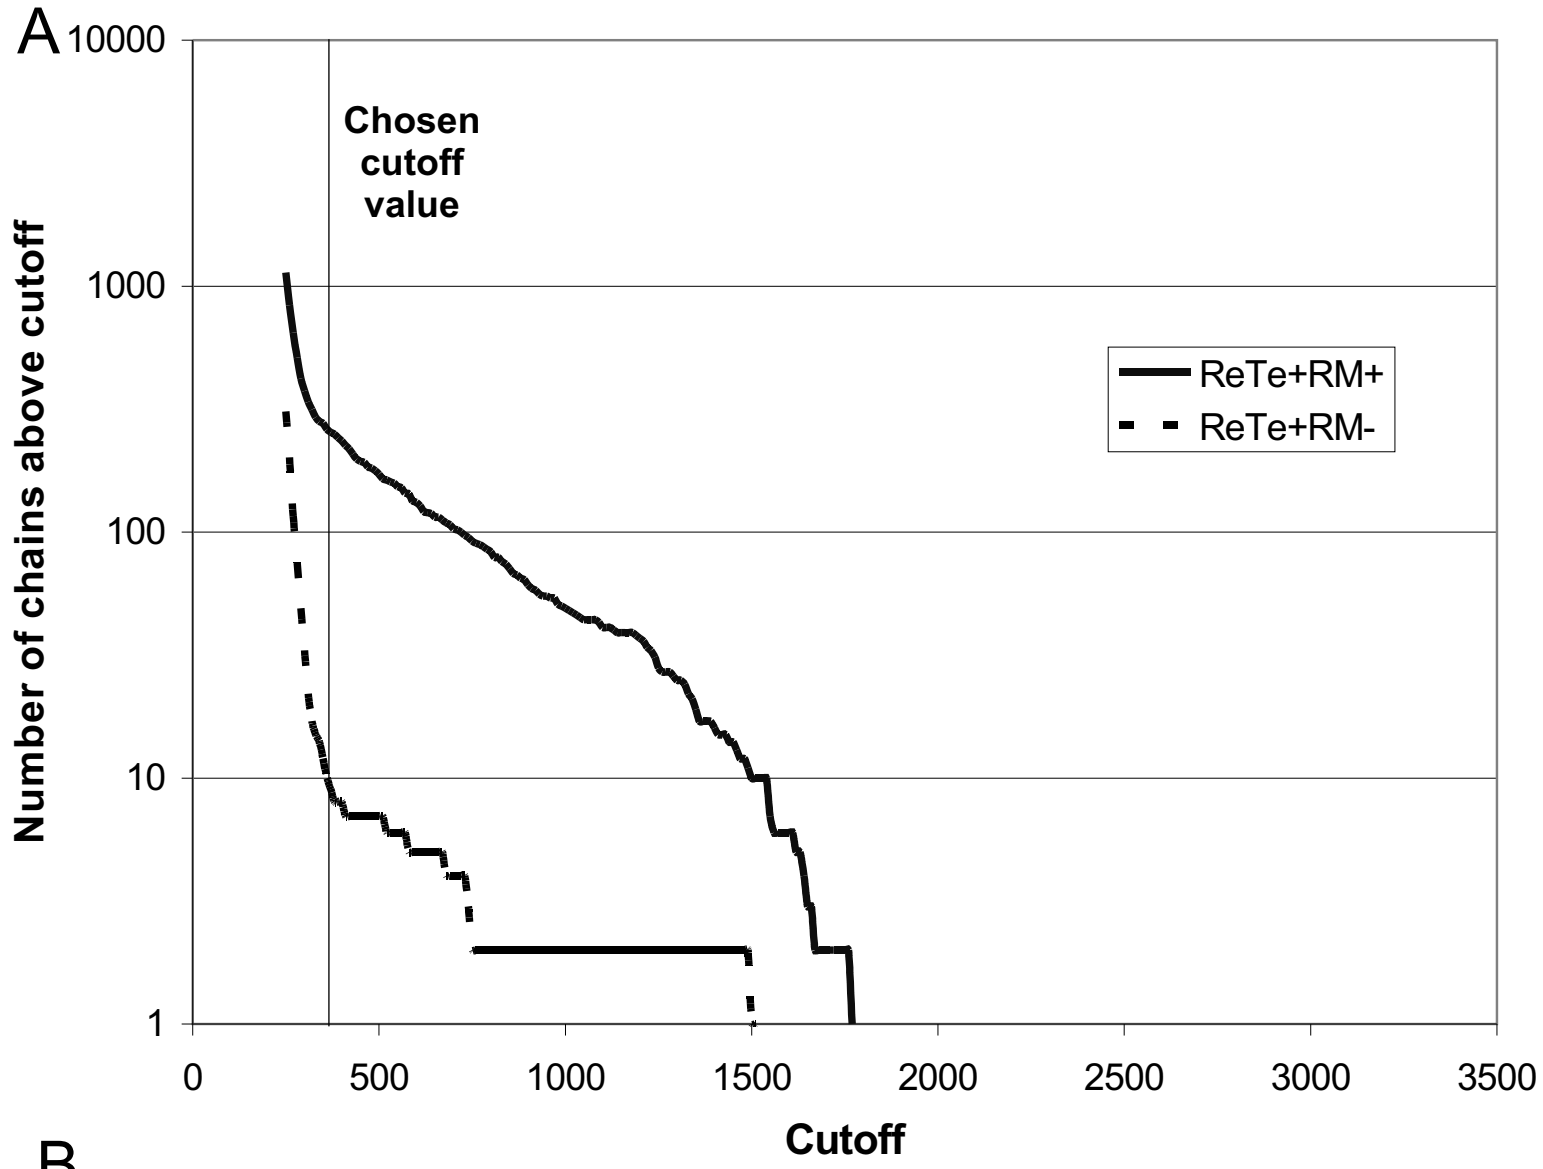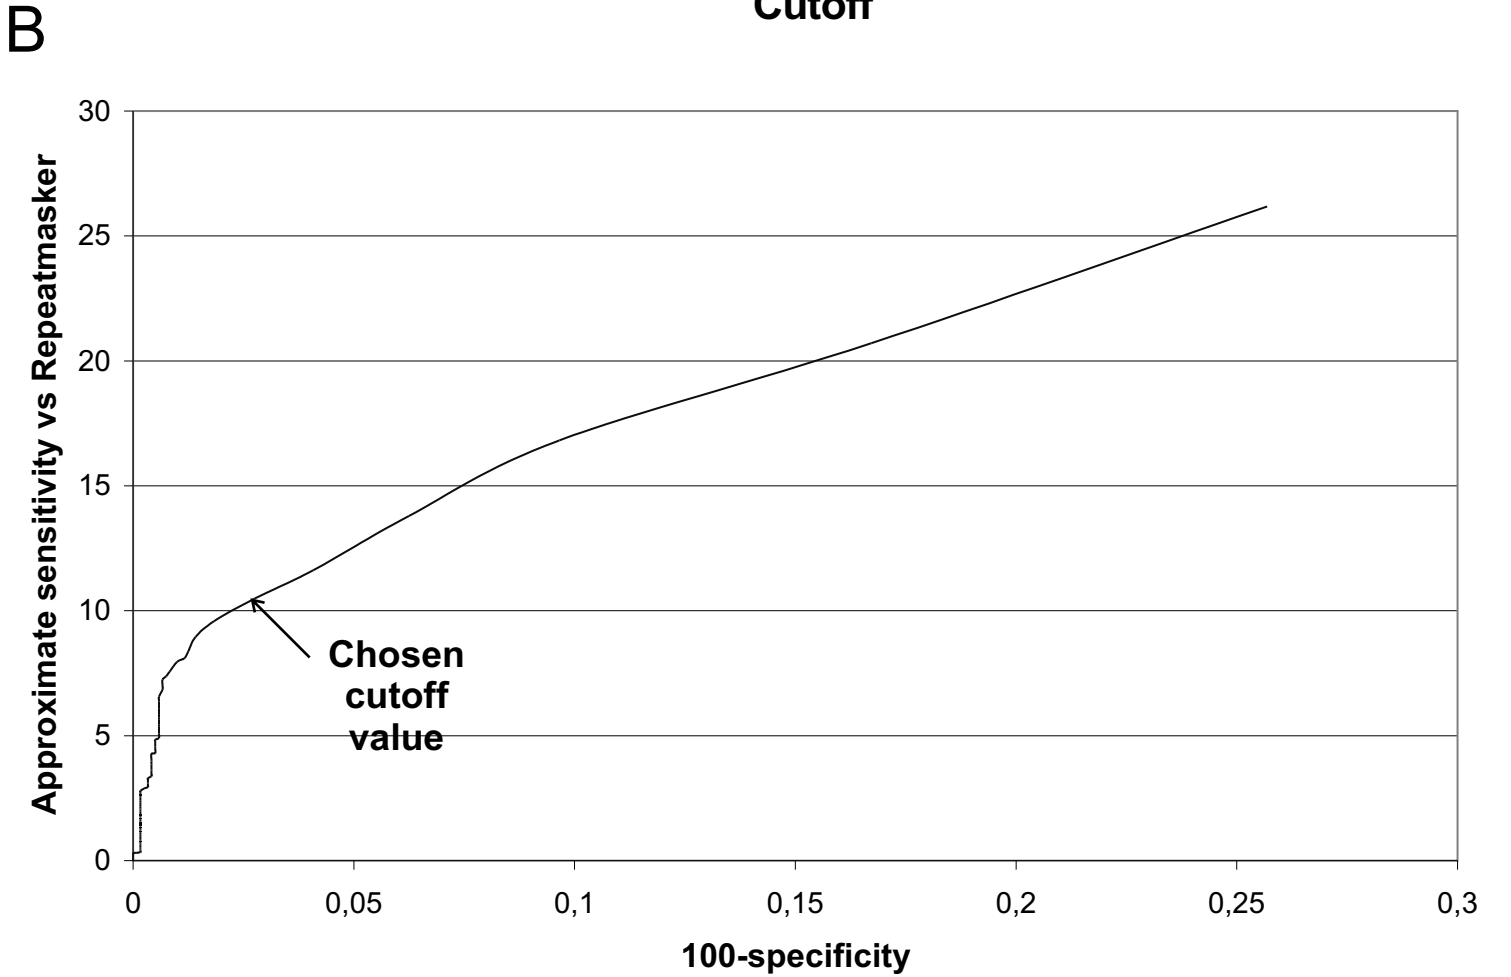

**A**

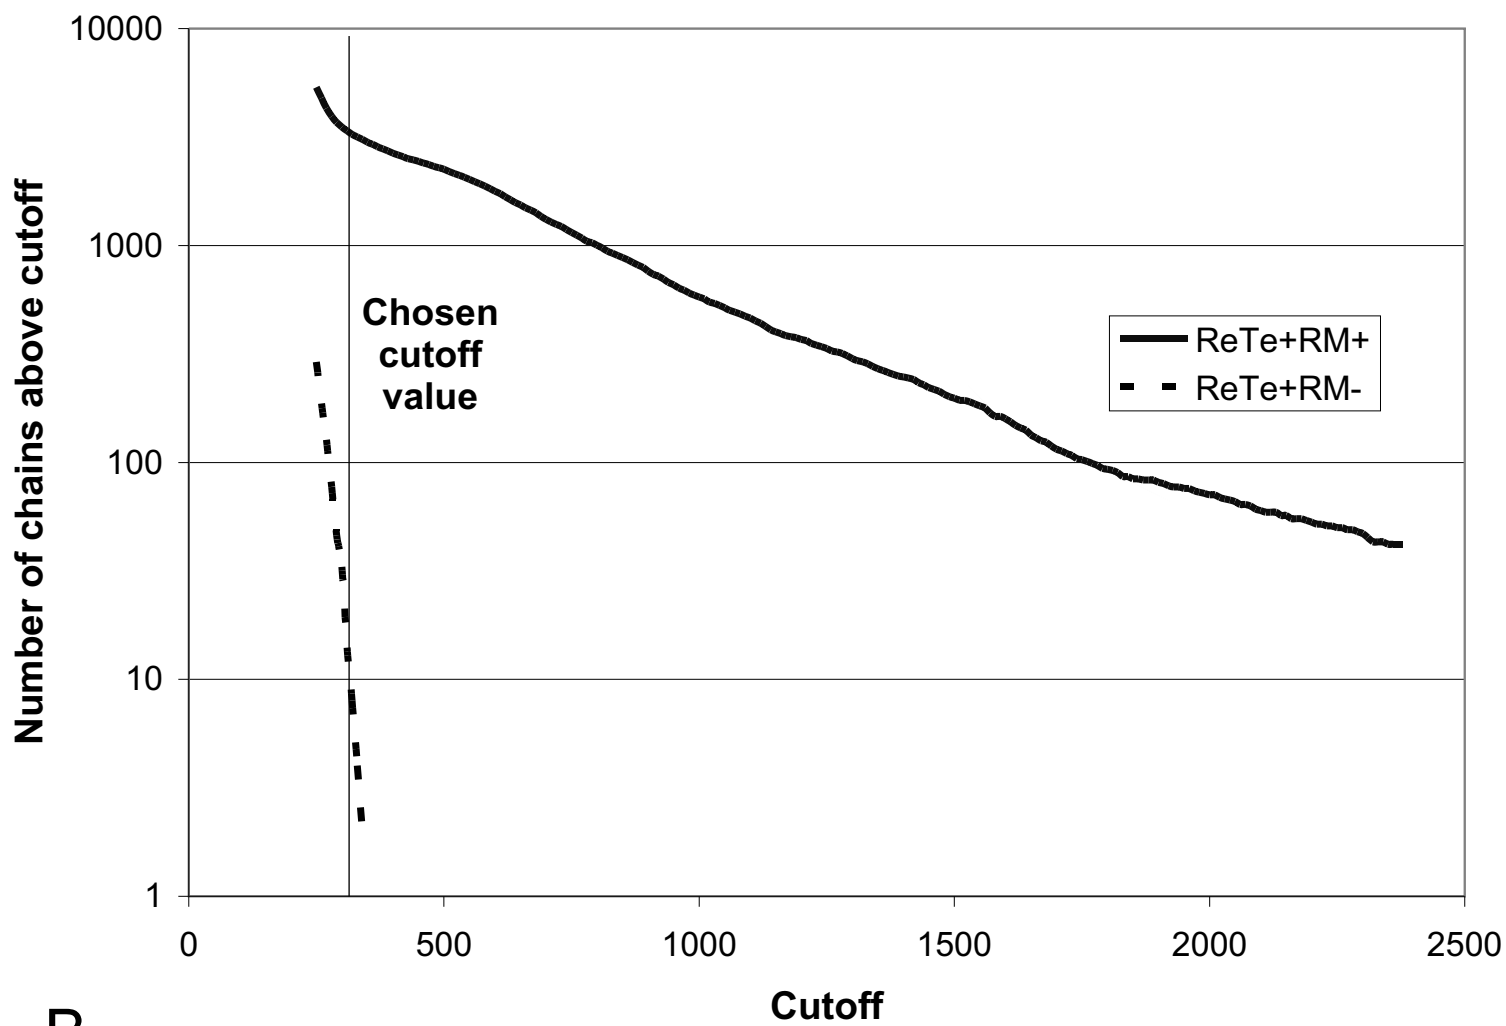

**B**

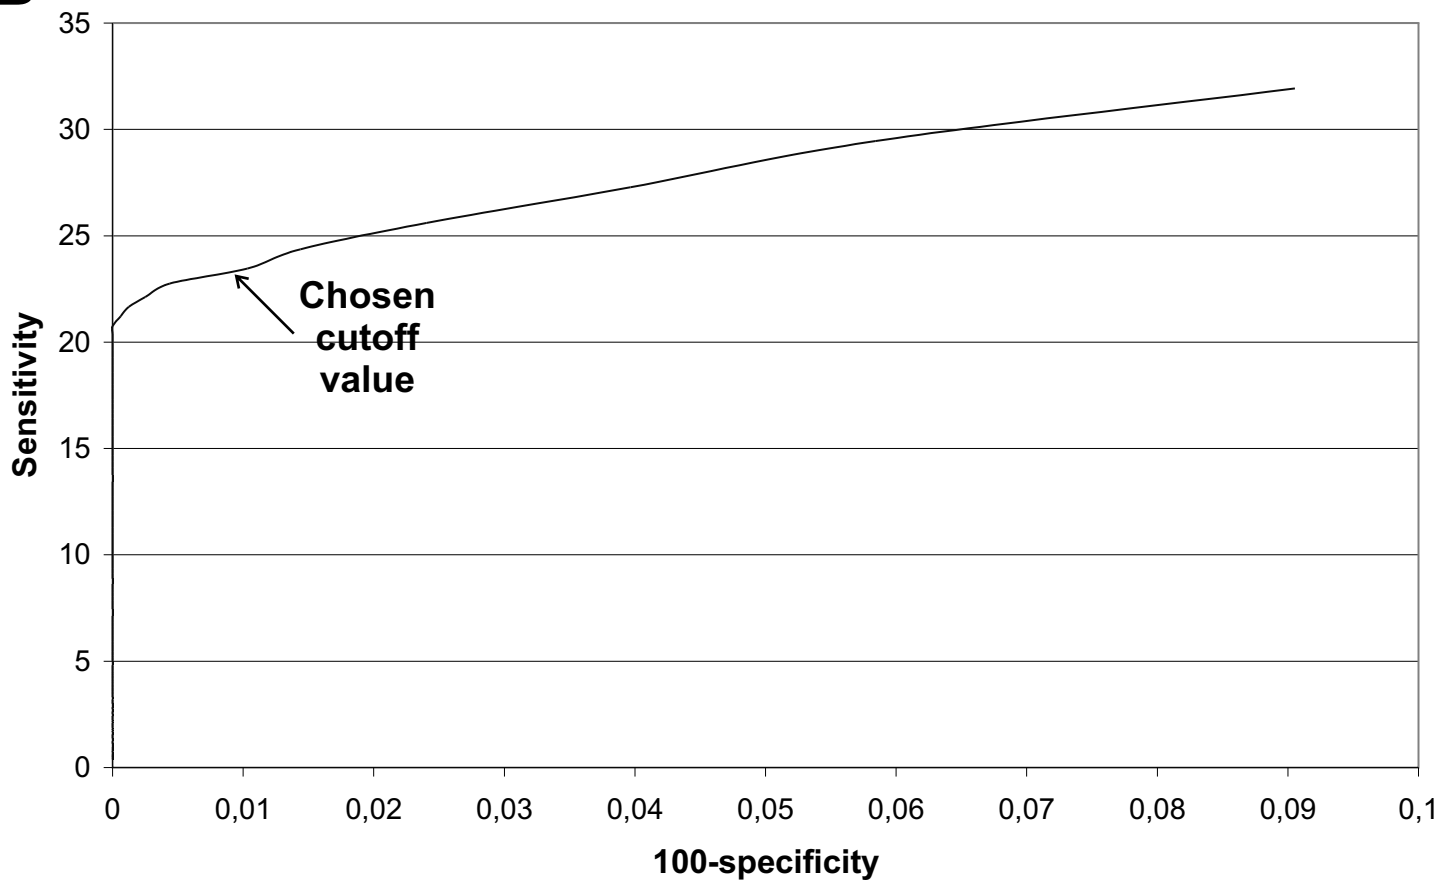

# RM vs ReTe for galGal3, smaller set

A

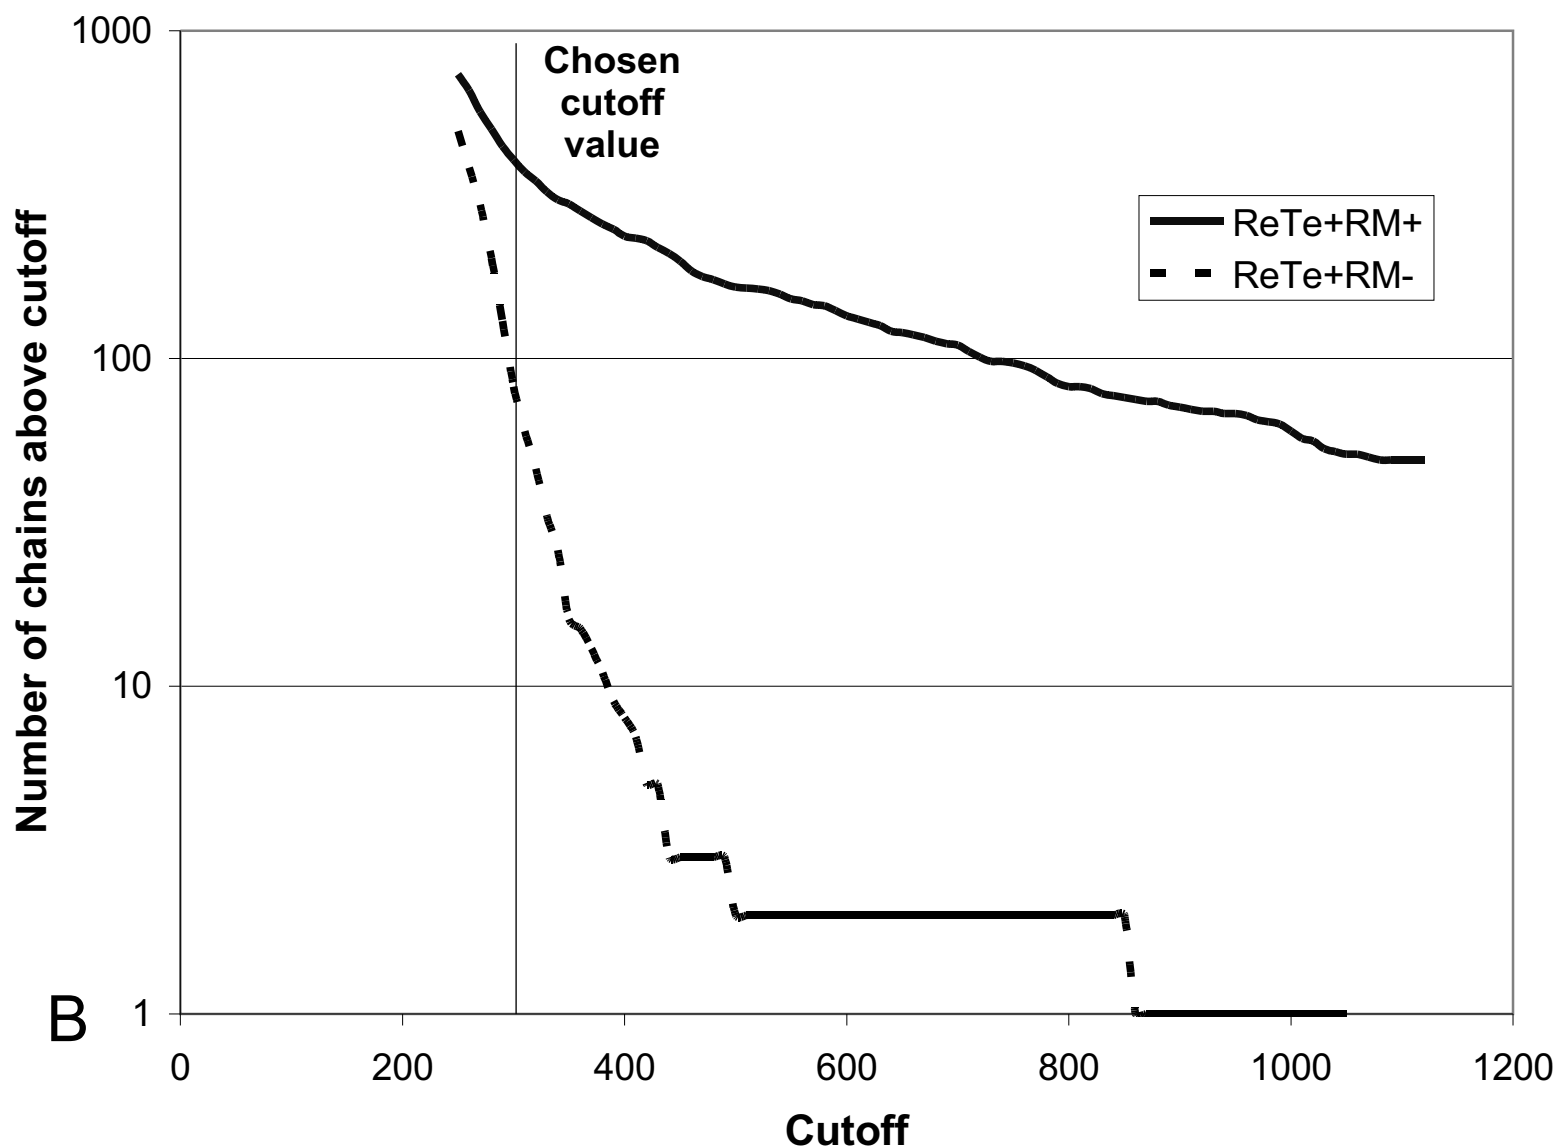

B

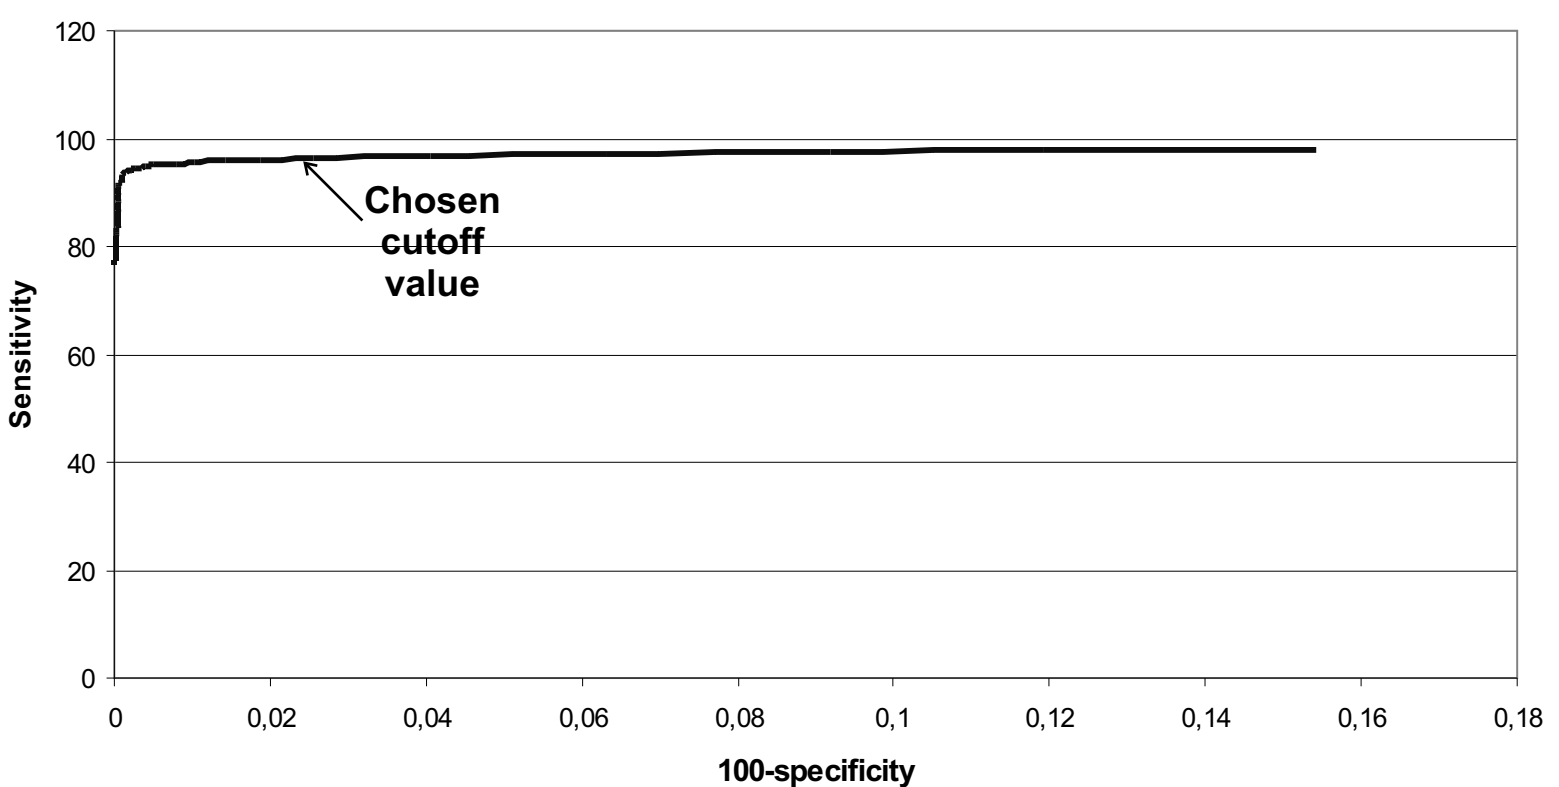

# A RM vs ReTe for canFam2, smaller set

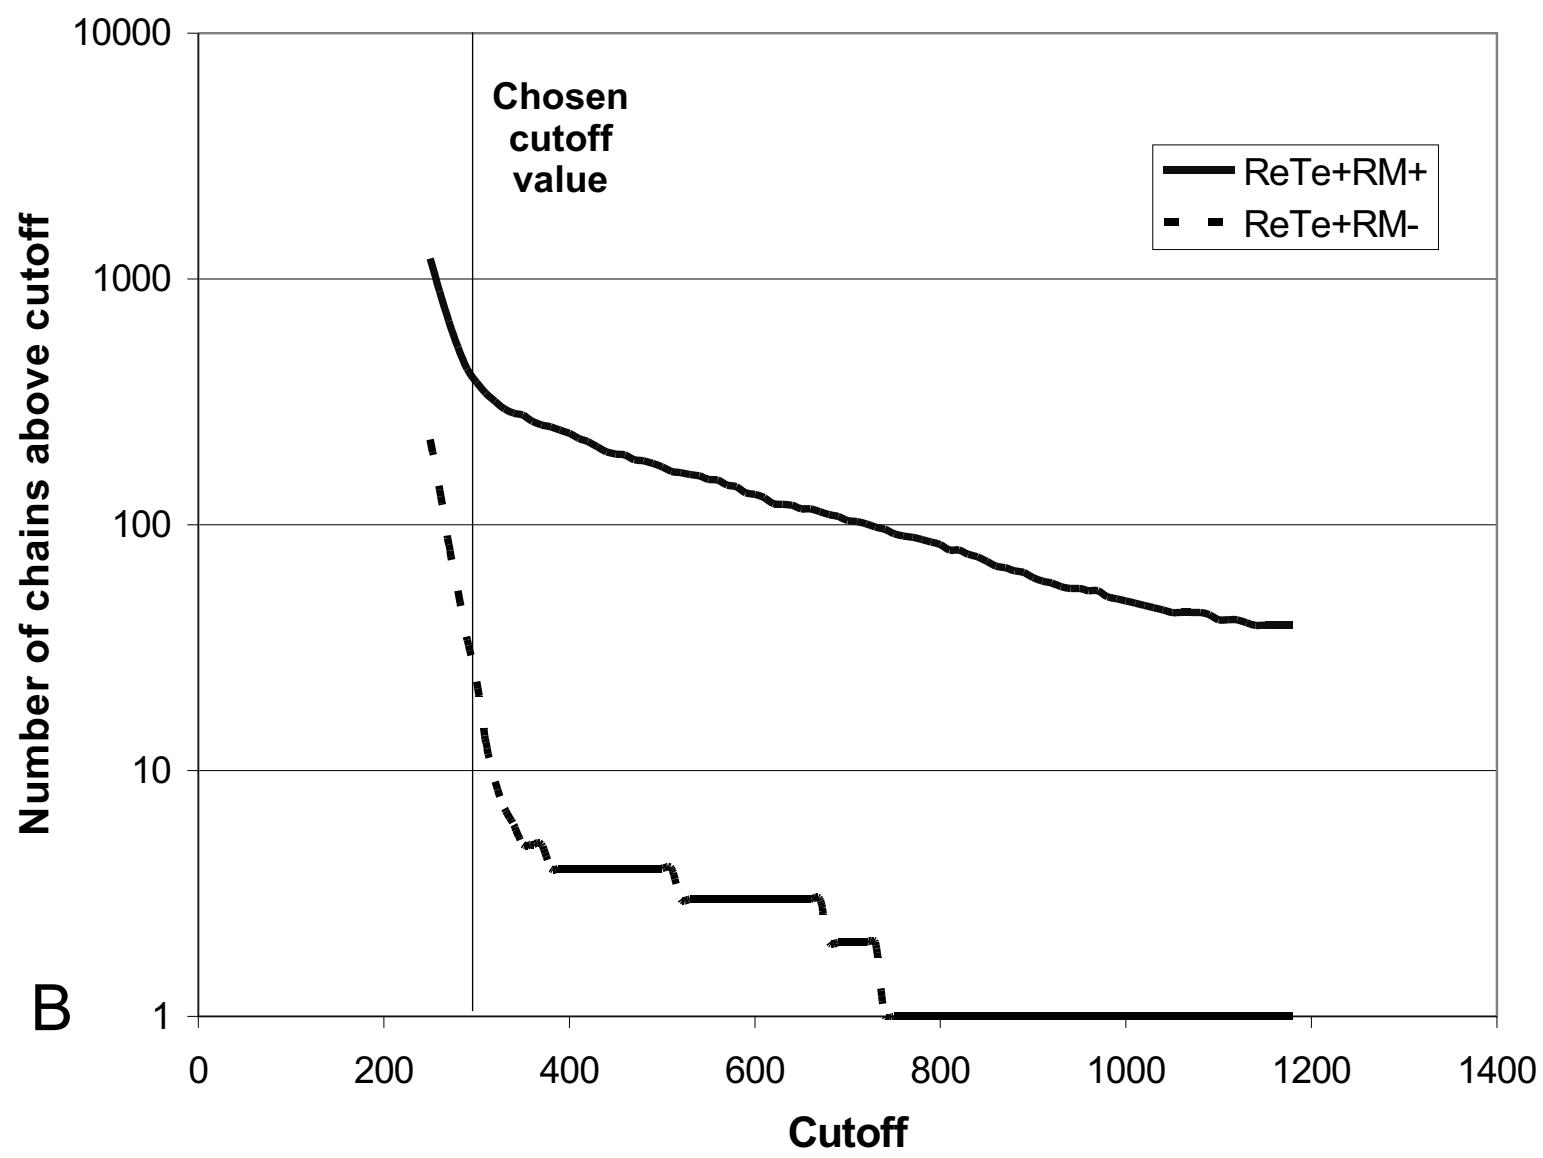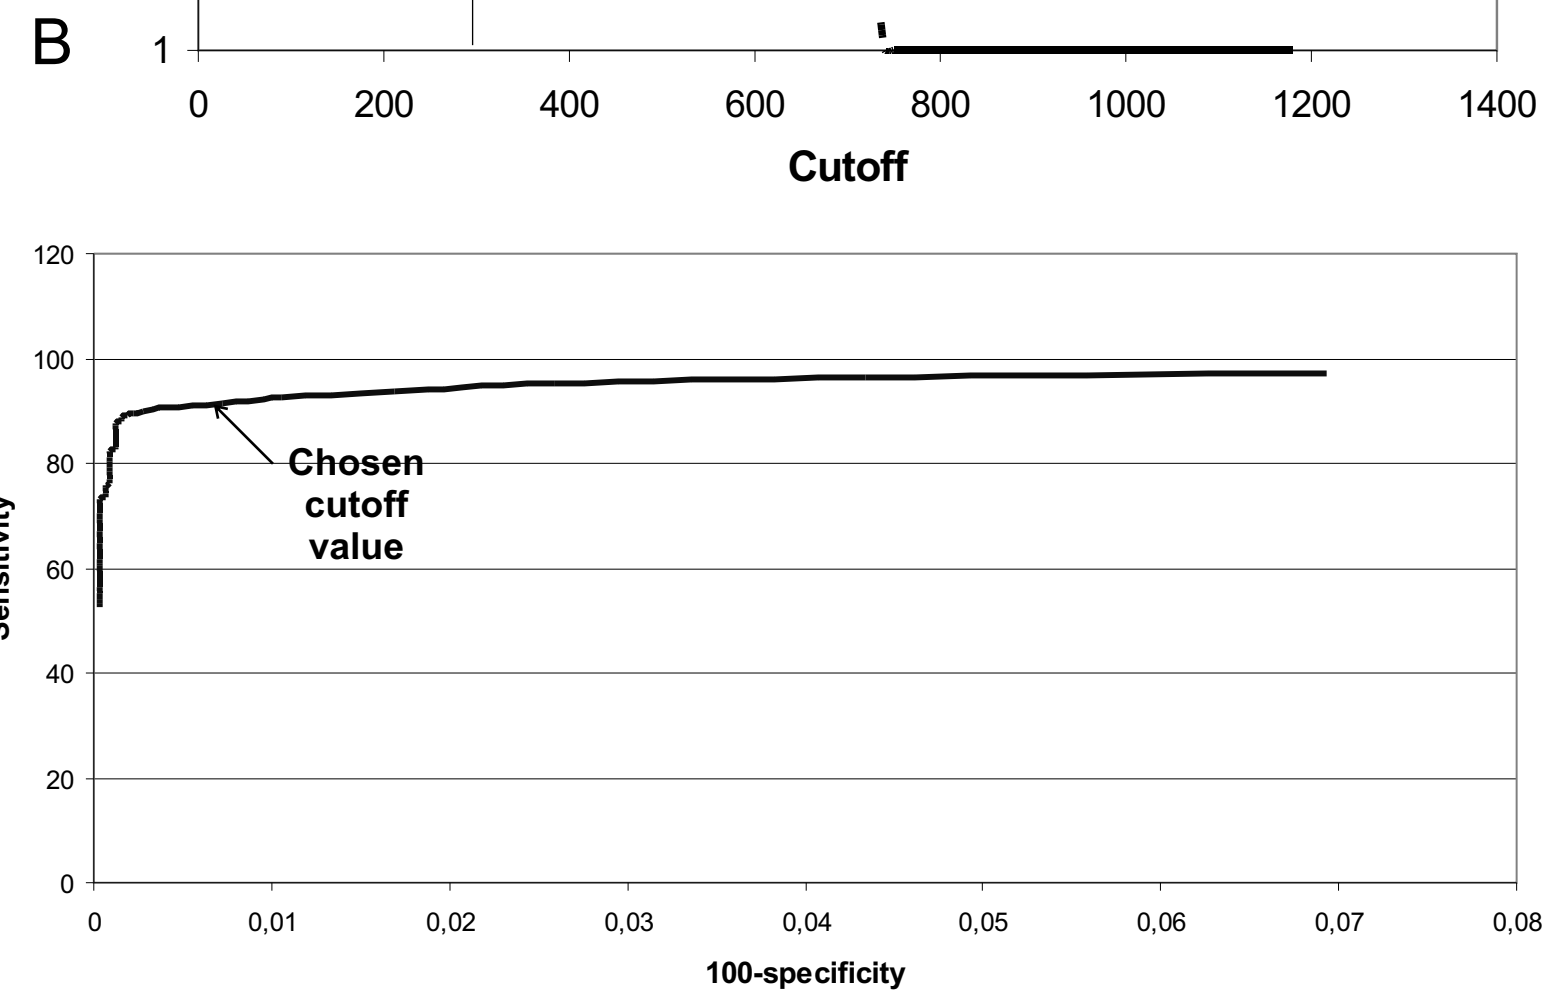



**A**

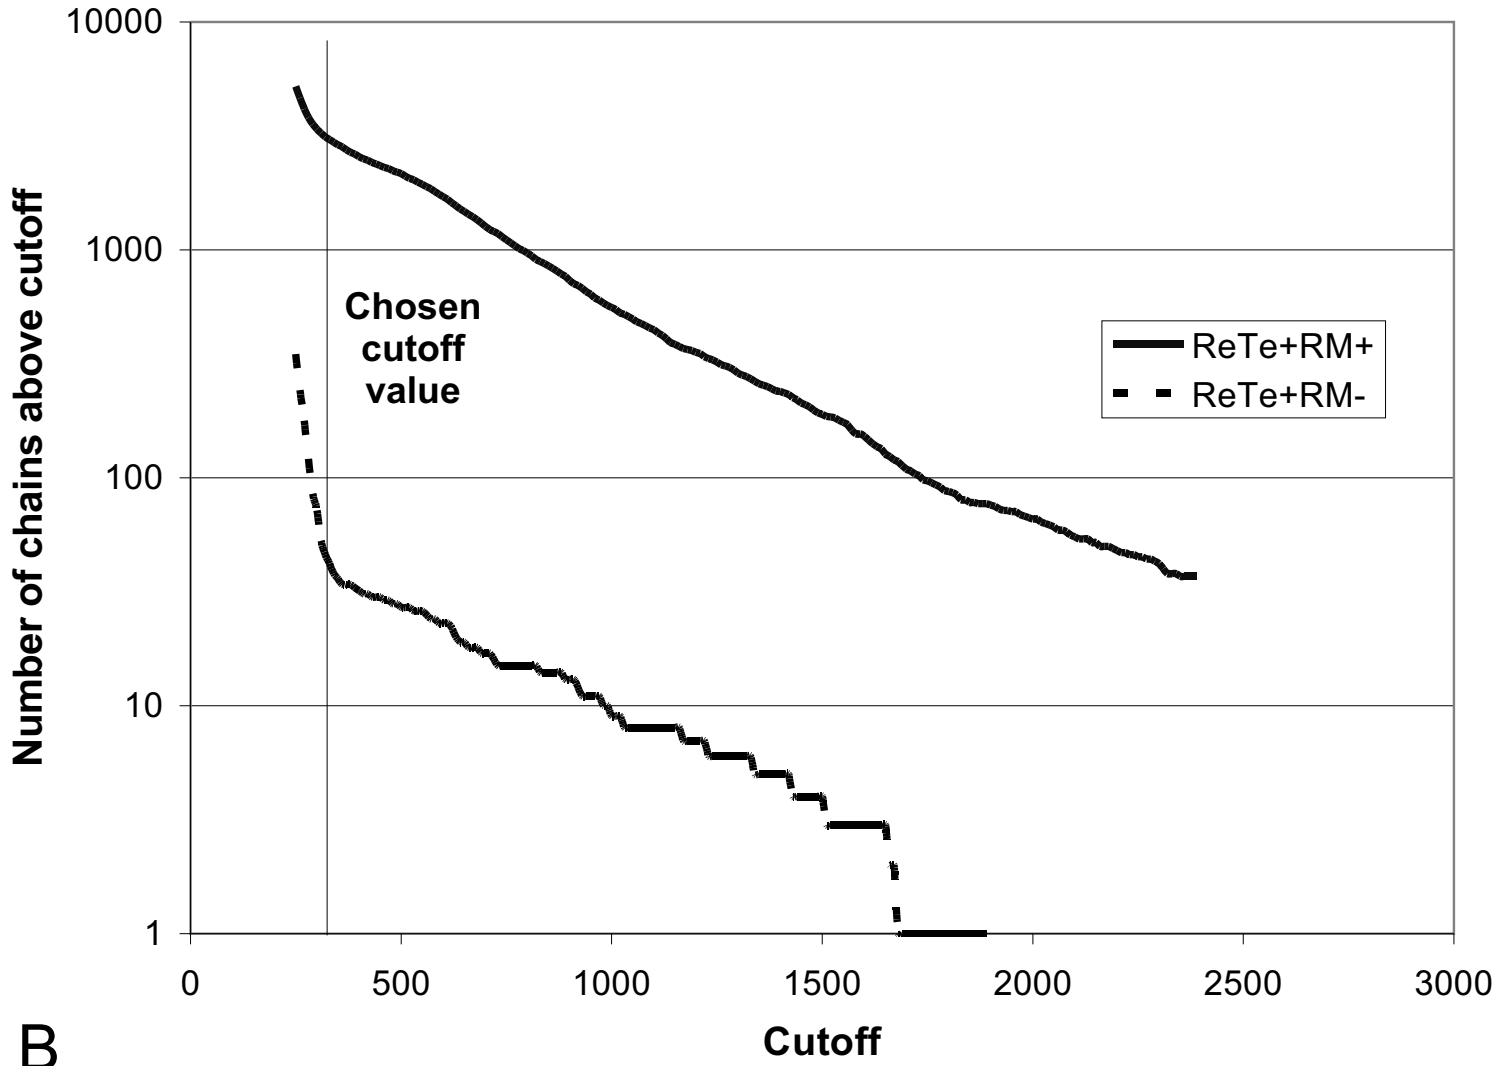

**B**

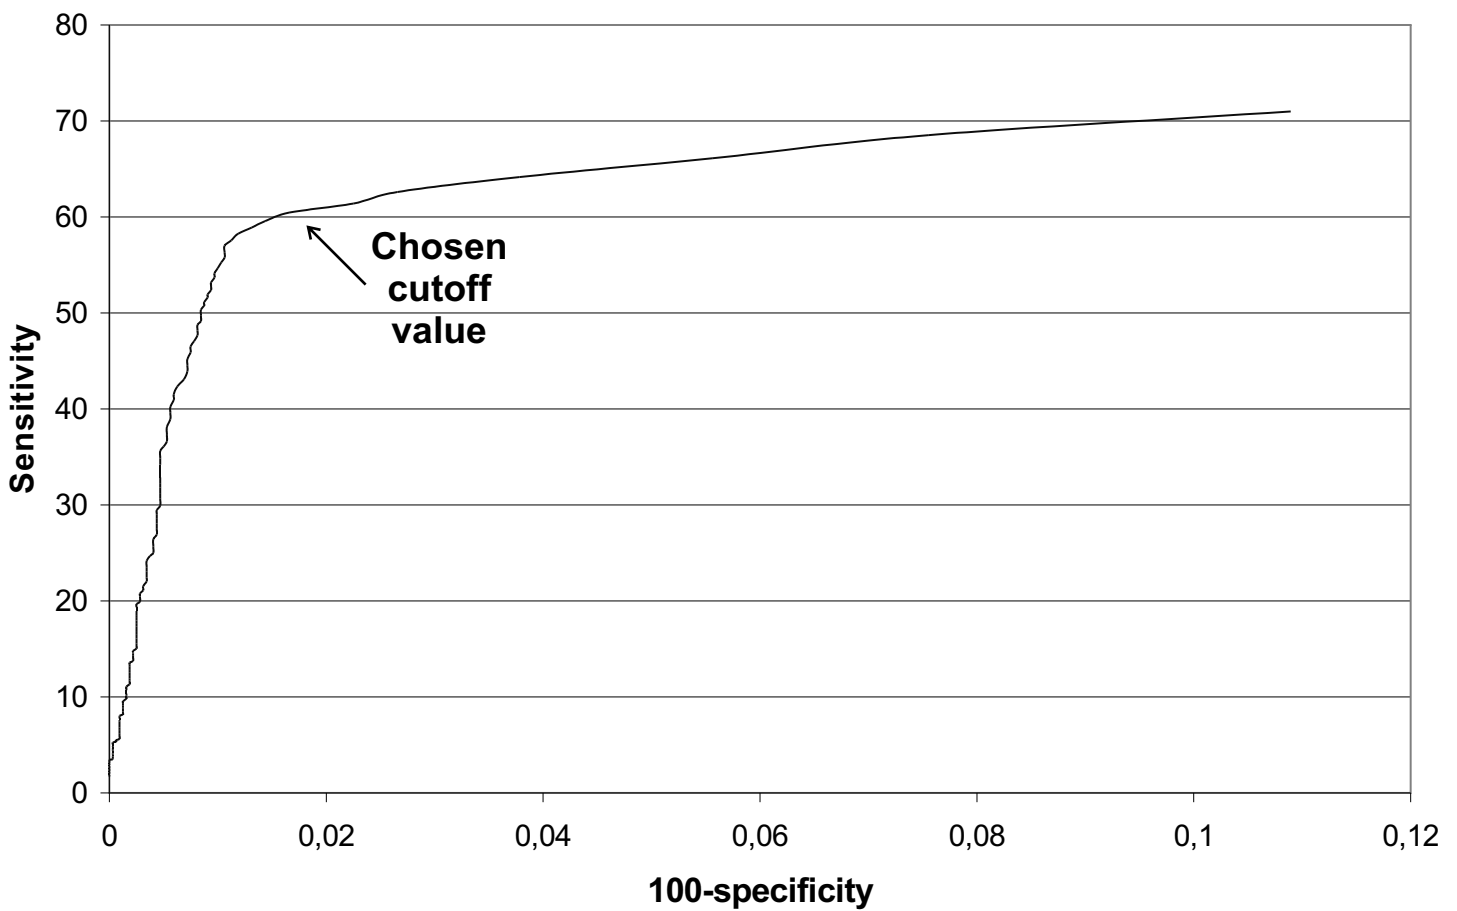

## **Description of some proviral chains missed in older or recent versions of RM.**

In this section, only elements with a ReTe score above 500 are considered.

*homo sapiens*: The proviruses HERVFc1 (chr Xq21.33 ) and HERVFRD (chr 6p24.2) were missing in hg15. In later (hg18) versions, HERVFc1 is entirely covered by HERVFH21 RM repeats. HERVFRD is partially covered by MER93 and MER50 repeats in hg18.

*canis familiaris*: A group of 7 HERVFc like repeats was not covered by RM in canFam1. In canFam2, they are all covered by repeats named CFERVF1.

*gallus gallus*: Several betaretroviruslike elements are still not covered in galGal3. One of them is shown in S17.

The retroviral genome diagrams (S17) produced from a retroviral genomic SQL database by ReTe have these conventions:

ReTe delineated gag, pro, pol and env genes are shown in yellow, red, green and orange, respectively. Hatching denotes a gene with more than one stop and frameshift. An Env which was reconstructed by EnvTracer is shown below the base line. A black bar shows the longest open reading frame within a gene. Motif hits are shown below the base line as bars whose length is proportional to the hit score.

## Betaretroviruslike chain in galGal3, chromosome 2\_54464341

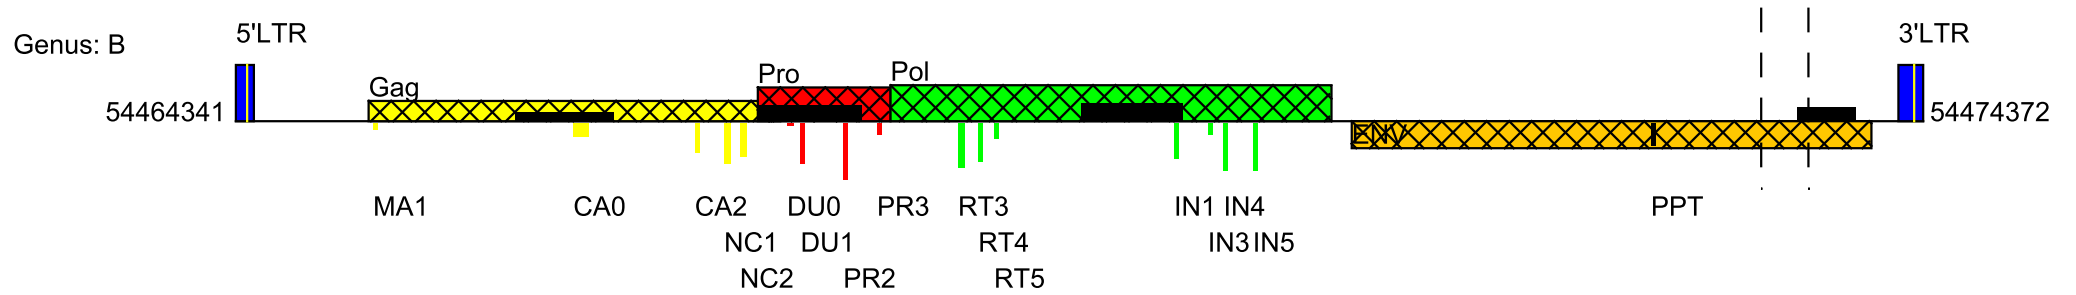

## Gammaretroviruslike chain in canFam2, chromosome 3\_85023462

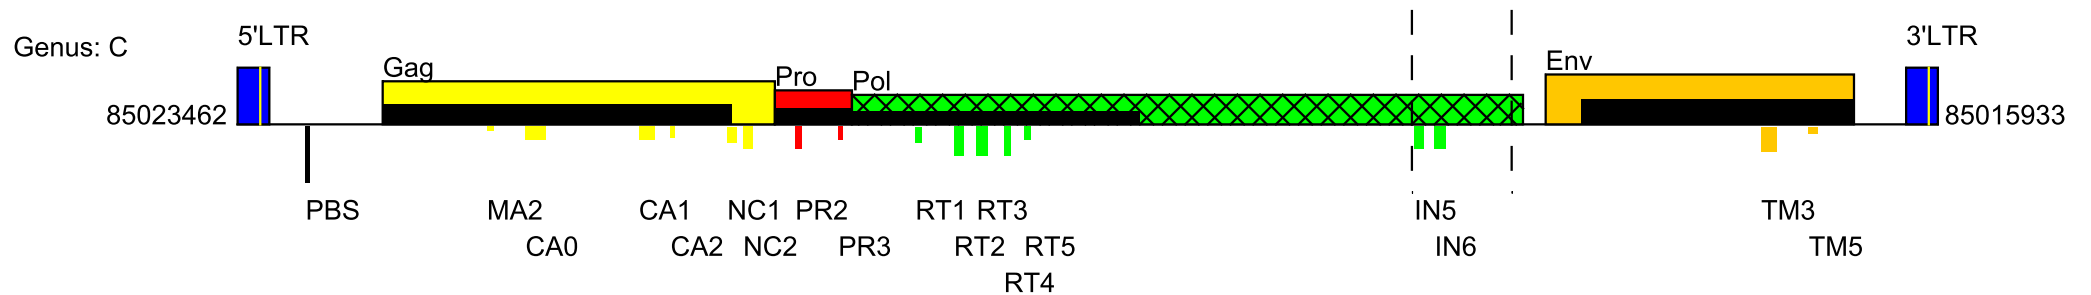

Supplement: nar_gkm515_1.pdf [file nar_gkm515_1.pdf]
